# Supplementary material for: Copper starvation induces antimicrobial isocyanide integrated into two distinct biosynthetic pathways in fungi
Source: PubMed Central journal article supplement (PMC9381783; doi:10.1038/s41467-022-32394-x), 2022-08-16
Supplement: 41467_2022_32394_MOESM1_ESM.pdf [file 41467_2022_32394_MOESM1_ESM.pdf]

# Copper starvation induces antimicrobial isocyanide integrated into two distinct biosynthetic pathways in fungi

## Supplementary Information

Tae Hyung Won<sup>1</sup>, Jin Woo Bok<sup>2</sup>, Nischala Nadig<sup>3</sup>, Nandhitha Venkatesh<sup>4</sup>, Grant Nickles<sup>5</sup>, Claudio Greco<sup>2,§</sup>, Fang Yun Lim<sup>2,§</sup>, Jennifer B. González<sup>6,§</sup>, B. Gillian Turgeon<sup>6</sup>, Nancy P. Keller<sup>2,3\*</sup>, Frank C. Schroeder<sup>1\*</sup>

<sup>1</sup>Boyce Thompson Institute and Department of Chemistry and Chemical Biology, Cornell University, Ithaca, NY, United States.

<sup>2</sup>Department of Medical Microbiology and Immunology, University of Wisconsin-Madison, Madison, WI, United States.

<sup>3</sup>Department of Bacteriology, University of Wisconsin-Madison, Madison, WI, United States.

<sup>4</sup>Department of Plant Pathology, University of Wisconsin-Madison, Madison, WI, United States.

<sup>5</sup>Department of Cellular and Molecular Biology, University of Wisconsin-Madison, Madison, WI, United States.

<sup>6</sup>Department of Plant Pathology and Plant-Microbe Biology, Cornell University, Ithaca, NY, United States.

\*Correspondence to [npkeller@wisc.edu](mailto:npkeller@wisc.edu) and [schroeder@cornell.edu](mailto:schroeder@cornell.edu)

§Current address:

Claudio Greco: Department of Molecular Microbiology, John Innes Centre, Norwich NR4 7UH, United Kingdom.

Fang Yun Lim: Department of Chemistry, University of Washington, Seattle, WA, United States.

Jennifer B. González: 104 Peckham Hall, Nazareth College, 4245 East Avenue, Rochester, NY, United States.

## Table of Contents

1. Supplementary Figures 1-8
2. Supplementary Tables 1-7
3. Supplementary Methods
4. NMR Spectroscopic Data and Spectra. Includes data for fumivaline A (**1**), fumicicolin A (**3**), *N*-formylvaline (**4**), (*S*)-2-isocyanoisovaleric acid (**5**), heterocicolins C (**12**), E (**14**), and F (**15**)
5. Supplementary References

# 1. Supplementary Figures

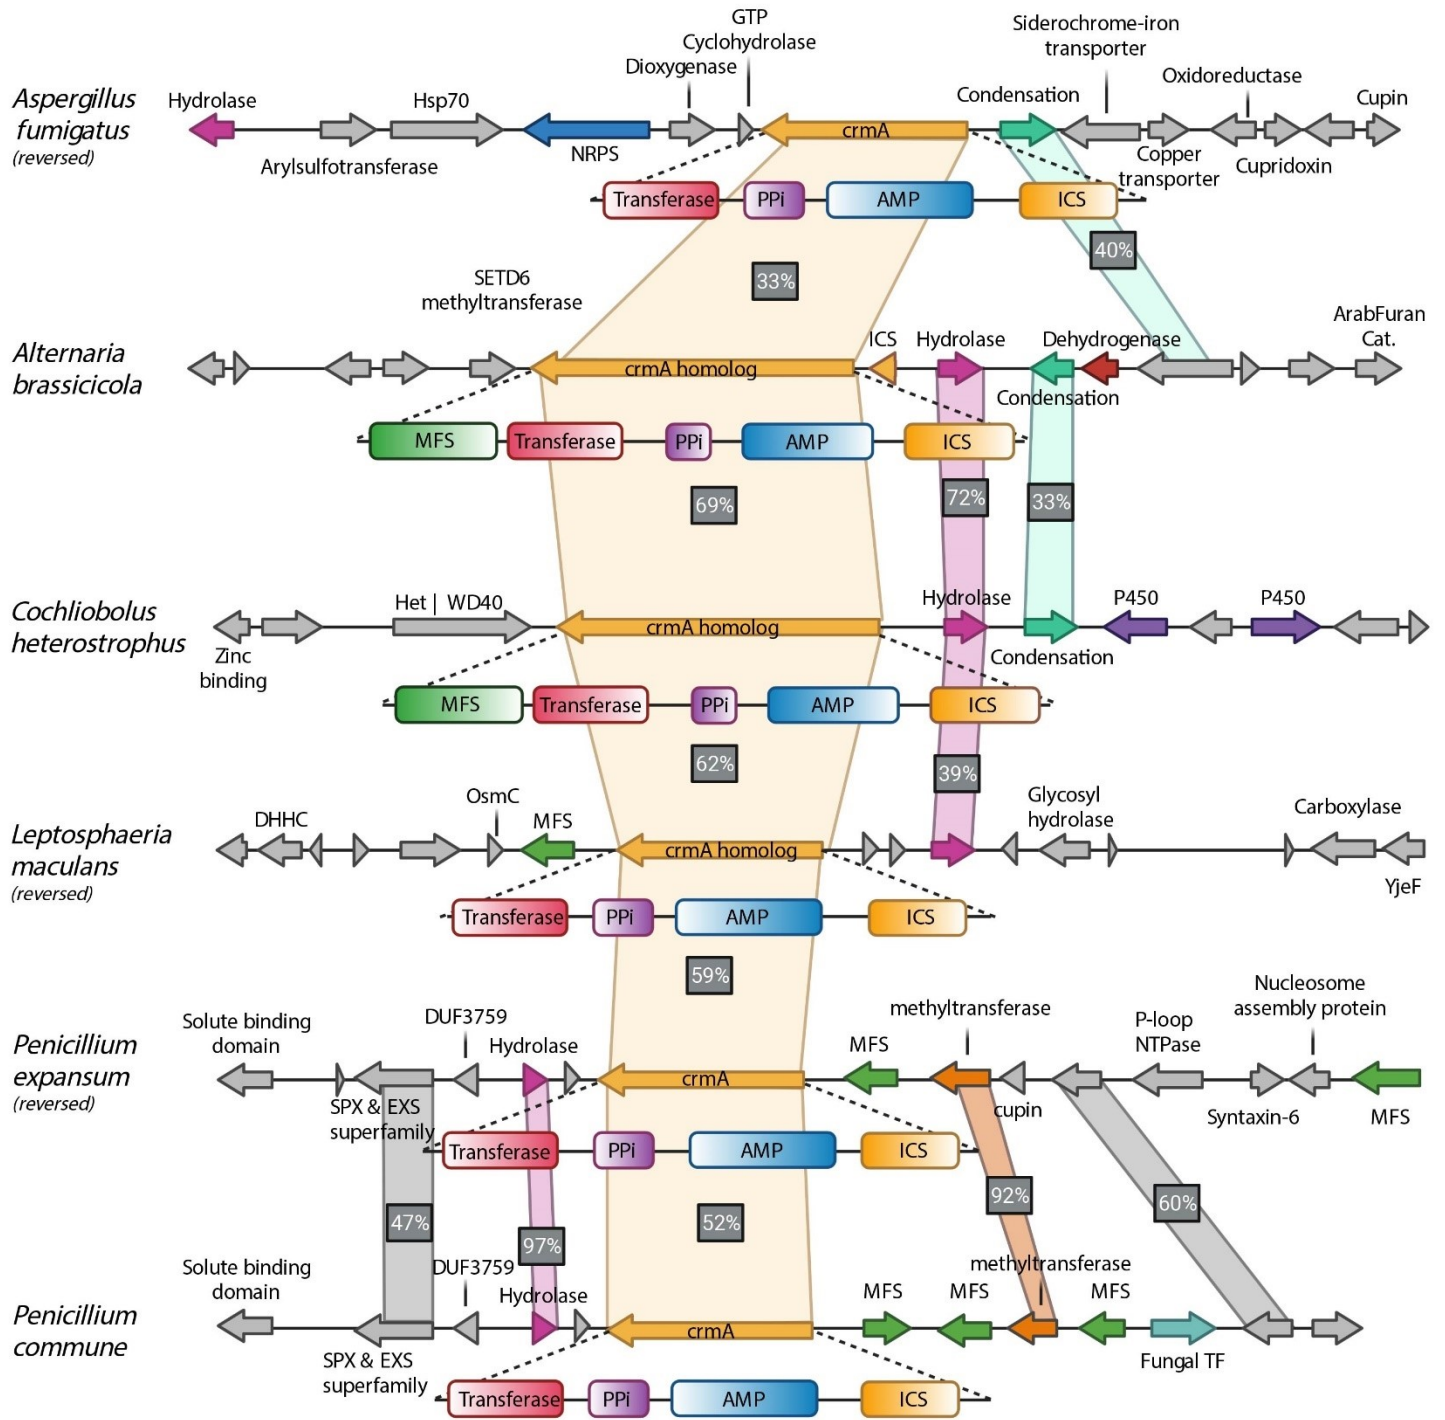

**Supplementary Figure 1.** Comparison of *crm* BGCs in various other fungi. Homologous genes are marked with colors based on their corresponding functions.

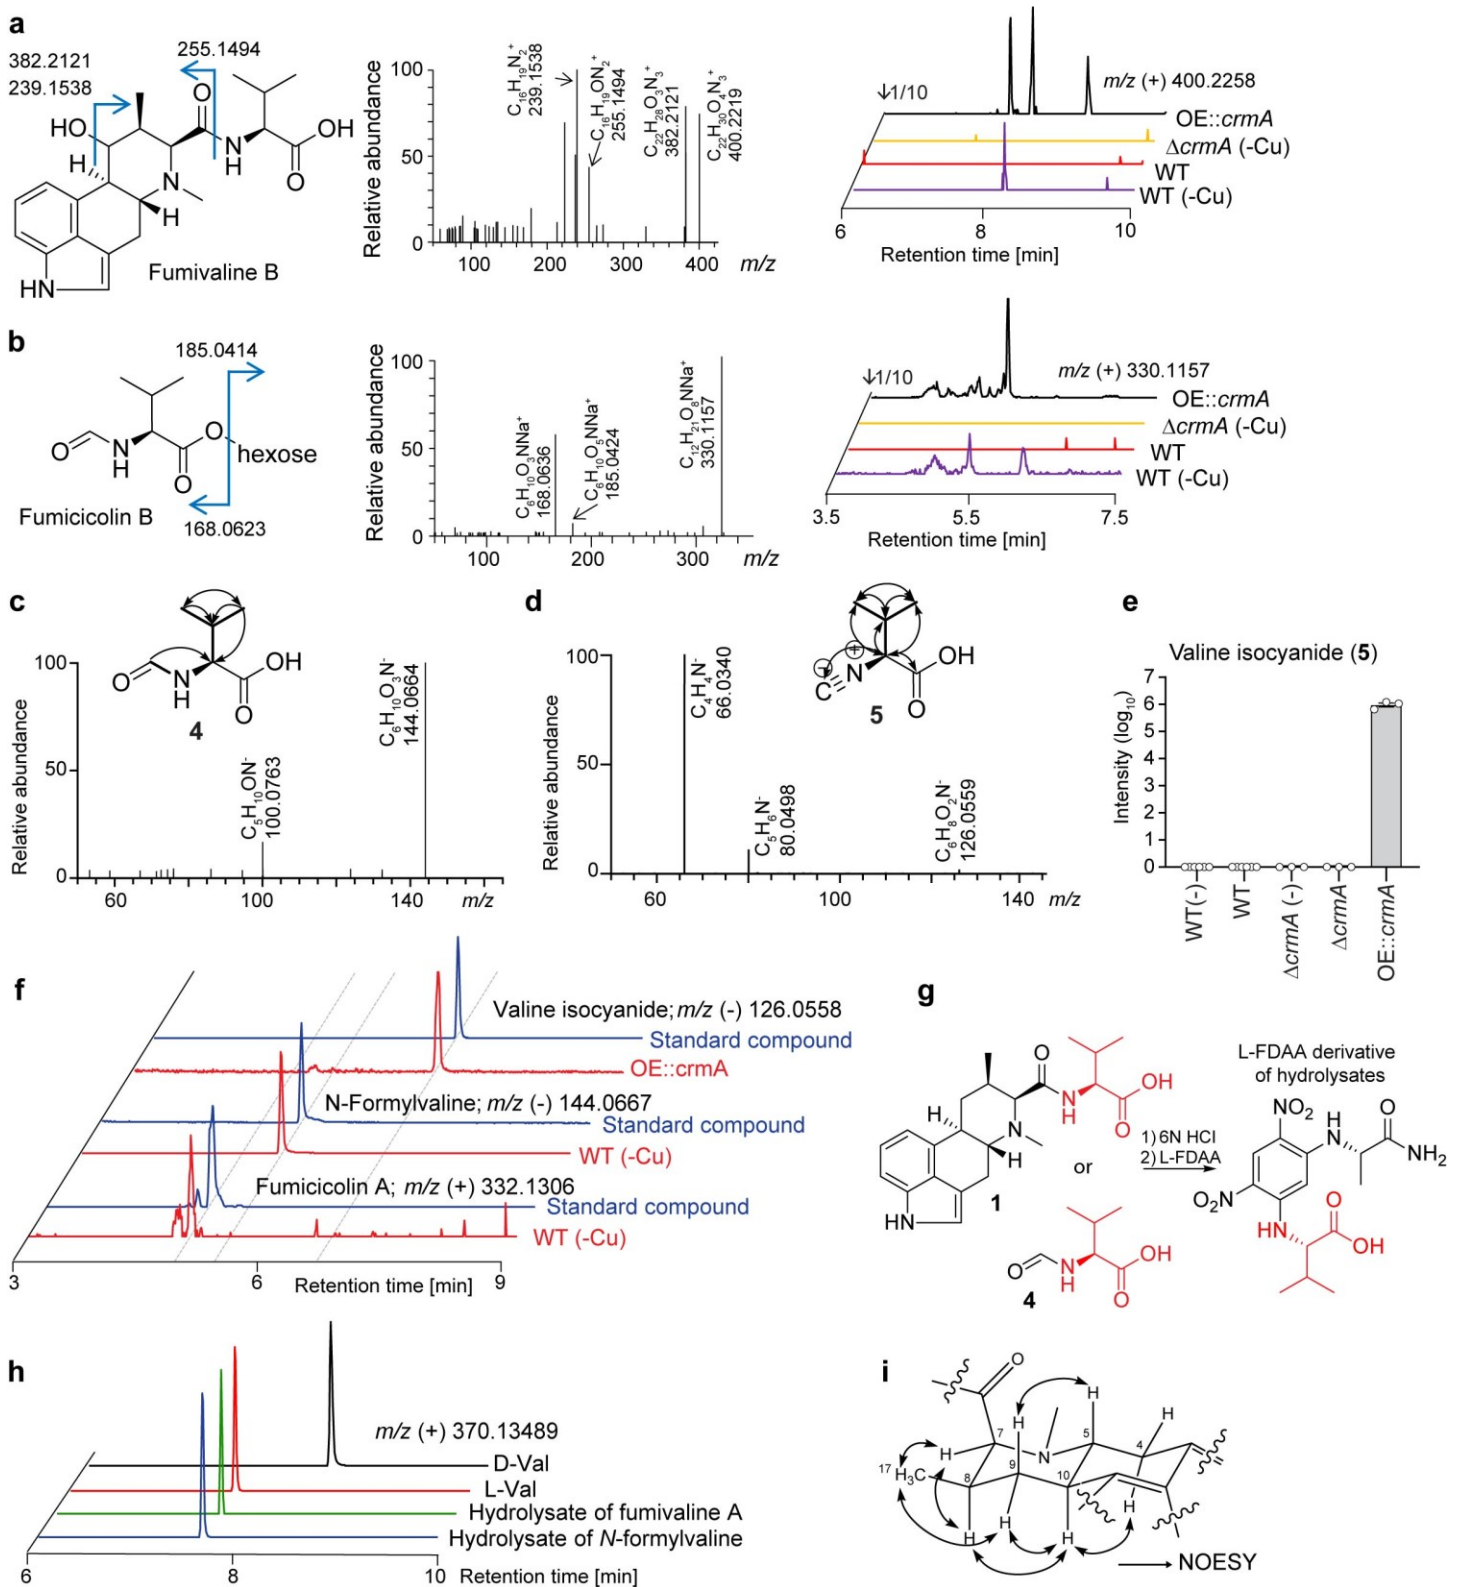

**Supplementary Figure 2.** Analysis of *crm*-dependent metabolites. **a,b**, Proposed structures, MS2 spectra, and ESI+ ion chromatograms of fumivaline B and *N*-formylvaline glycoside in *A. fumigatus*. **c,d**, COSY and HMBC correlations and MS2 spectra in ESI- mode of *N*-formylvaline (**4**) and (*S*)-2-isocyanoisovaleric acid (valine isocyanide, **5**). **e**, Relative abundance of valine isocyanide (**5**) in *A. fumigatus* (from extraction with non-deuterated solvents). **f**, Extracted ion chromatograms (EICs) of fumicolin A (**3**), *N*-formylvaline (**4**), and valine isocyanide (**5**) in *A. fumigatus* and comparison with synthetic standards. **g,h**, Determination of the absolute configuration of valine moieties in *N*-formylvaline (**4**) and fumivaline A (**1**) using Marfey's method. Reaction S4



schemes for acid hydrolysis and FDAA derivatization (**g**), and EICs for L-FDAA derivatives of L-Val (red), D-Val (black), hydrolysate of *N*-formylvaline (blue), and fumivaline A (green) (**h**). **i**, Determination of the relative configuration of fumivaline A (**1**) based on NOESY correlations. In **e**, bars represent mean  $\pm$  s.e.m. with six independent biological replicates for *A. fumigatus* wild type and three for the other strains. Source data are provided as a Source Data file.

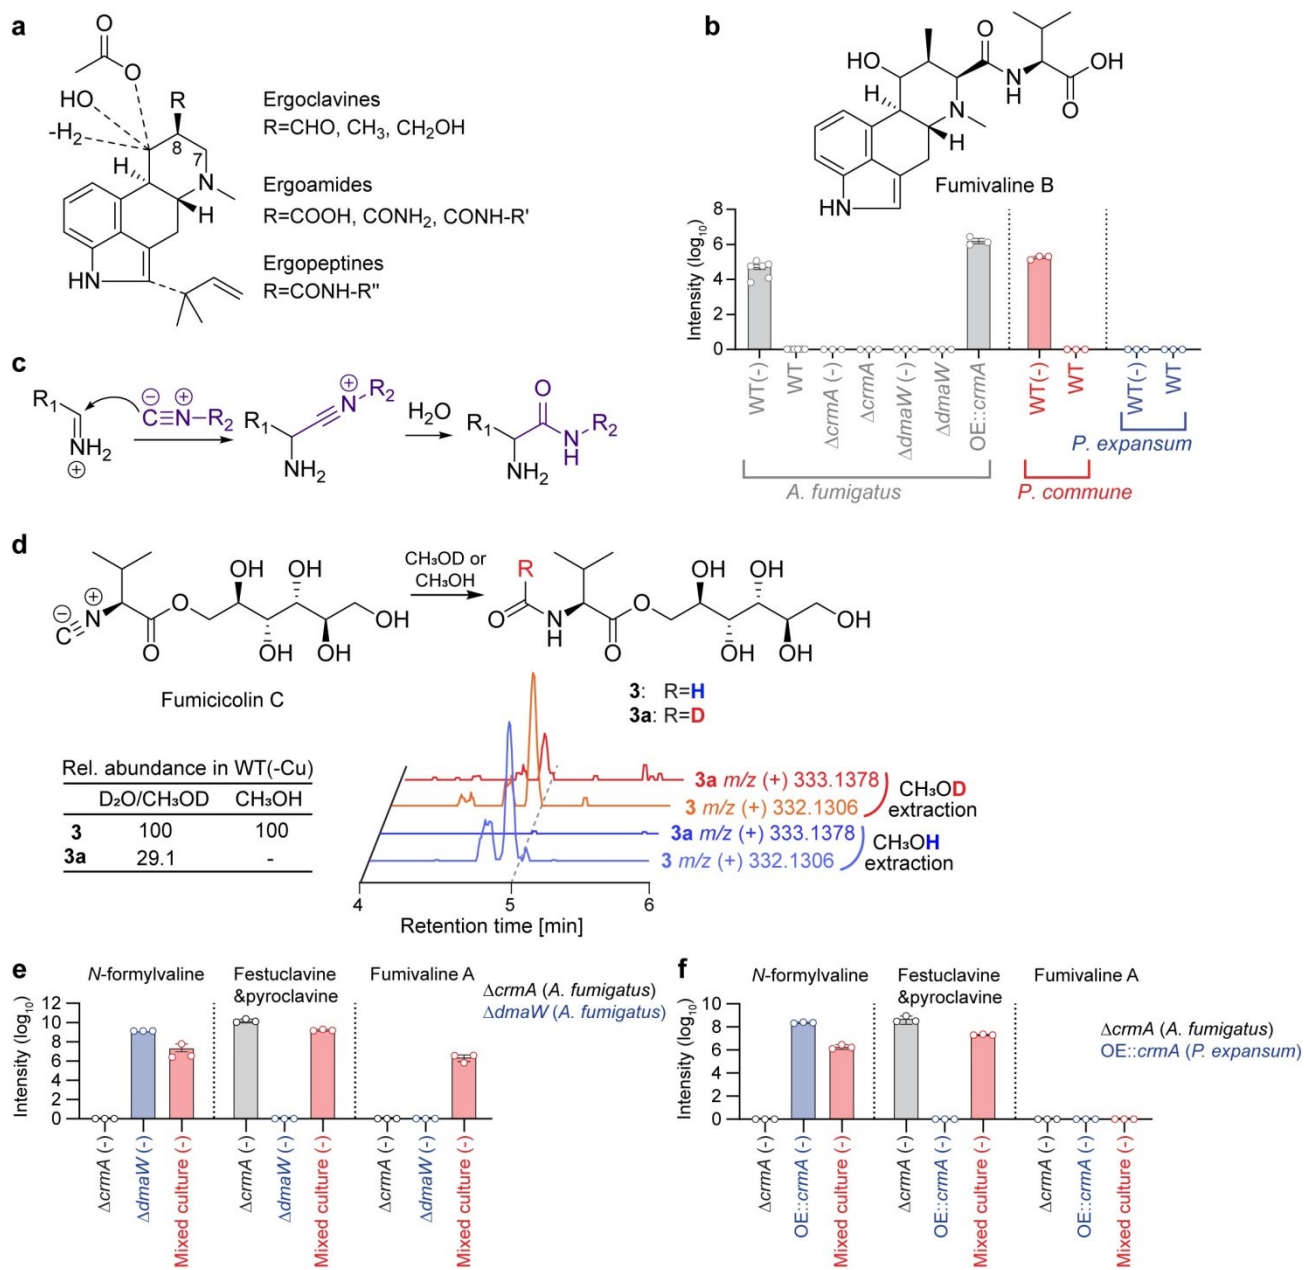

**Supplementary Figure 3.** Interaction of ergot alkaloid and *crmA* pathways. **a**, Comparison of the structures of the different ergot alkaloid families, ergoclavines, ergoamides, and ergopeptines. **b**, Relative abundance of fumivaline B in *A. fumigatus*, *P. commune*, and *P. expansum* (grey, red, and blue, respectively). **c**, Strecker amino acid synthesis. **d**, Relative abundances of fumicicolin A (**3**) and [7-<sup>2</sup>H]-fumicicolin A (**3a**) derived from fumicicolin C, an ester of valine isocyanide and D-mannitol, in extracts of wild type *A. fumigatus* (grown without copper) extracted with deuterated or non-deuterated solvents. **e, f**, Relative abundances of *N*-formylvaline (**4**), festuclavine (**2**), pyroclavine, and fumivaline A (**1**) in pure and mixed cultures of Δ*crmA* and Δ*dmaW* of *A. fumigatus* (**e**) or Δ*crmA* of *A. fumigatus* and OE::*crmA* of *P. expansum* (**f**) under copper starvation conditions. In **b**, **e**, and **f**, bars represent mean ± s.e.m. with six independent biological replicates for *A. fumigatus* wild type and three for the other strains. Source data are provided as a Source Data file.

# Fumicolin A and heterocicolins

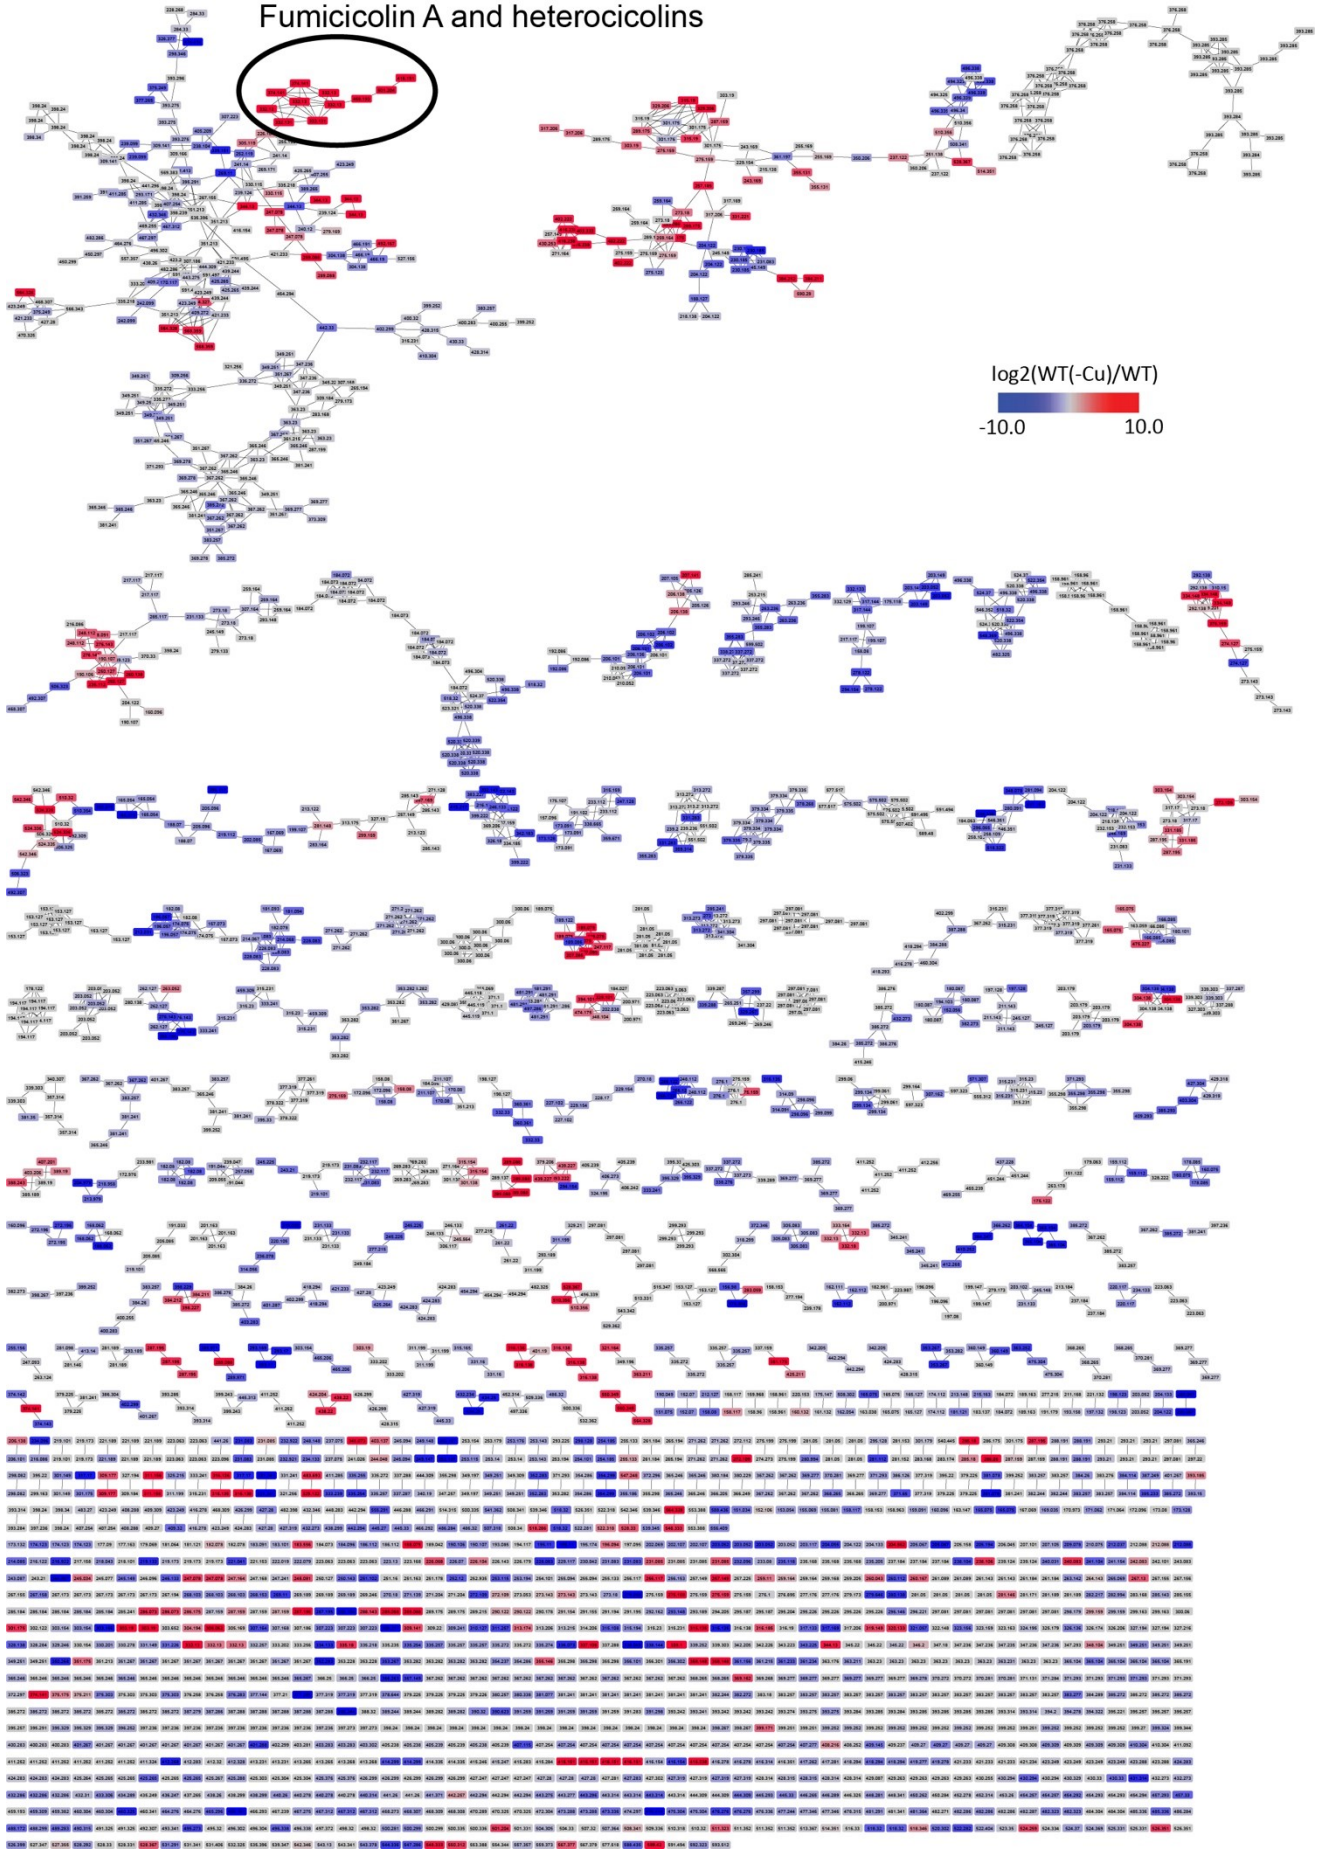

**Supplementary Figure 4.** MS2 network of copper-dependent differential features in WT of *C. heterostrophus* in ESI+. Blue and red represent downregulated and upregulated features, respectively, in WT grown without copper relative to WT *C. heterostrophus* grown with copper. Black circles highlight the subnetworks for the most abundant differential MS features related to fumicicolin A (**3**) and the heterocicolins (**10-15**).

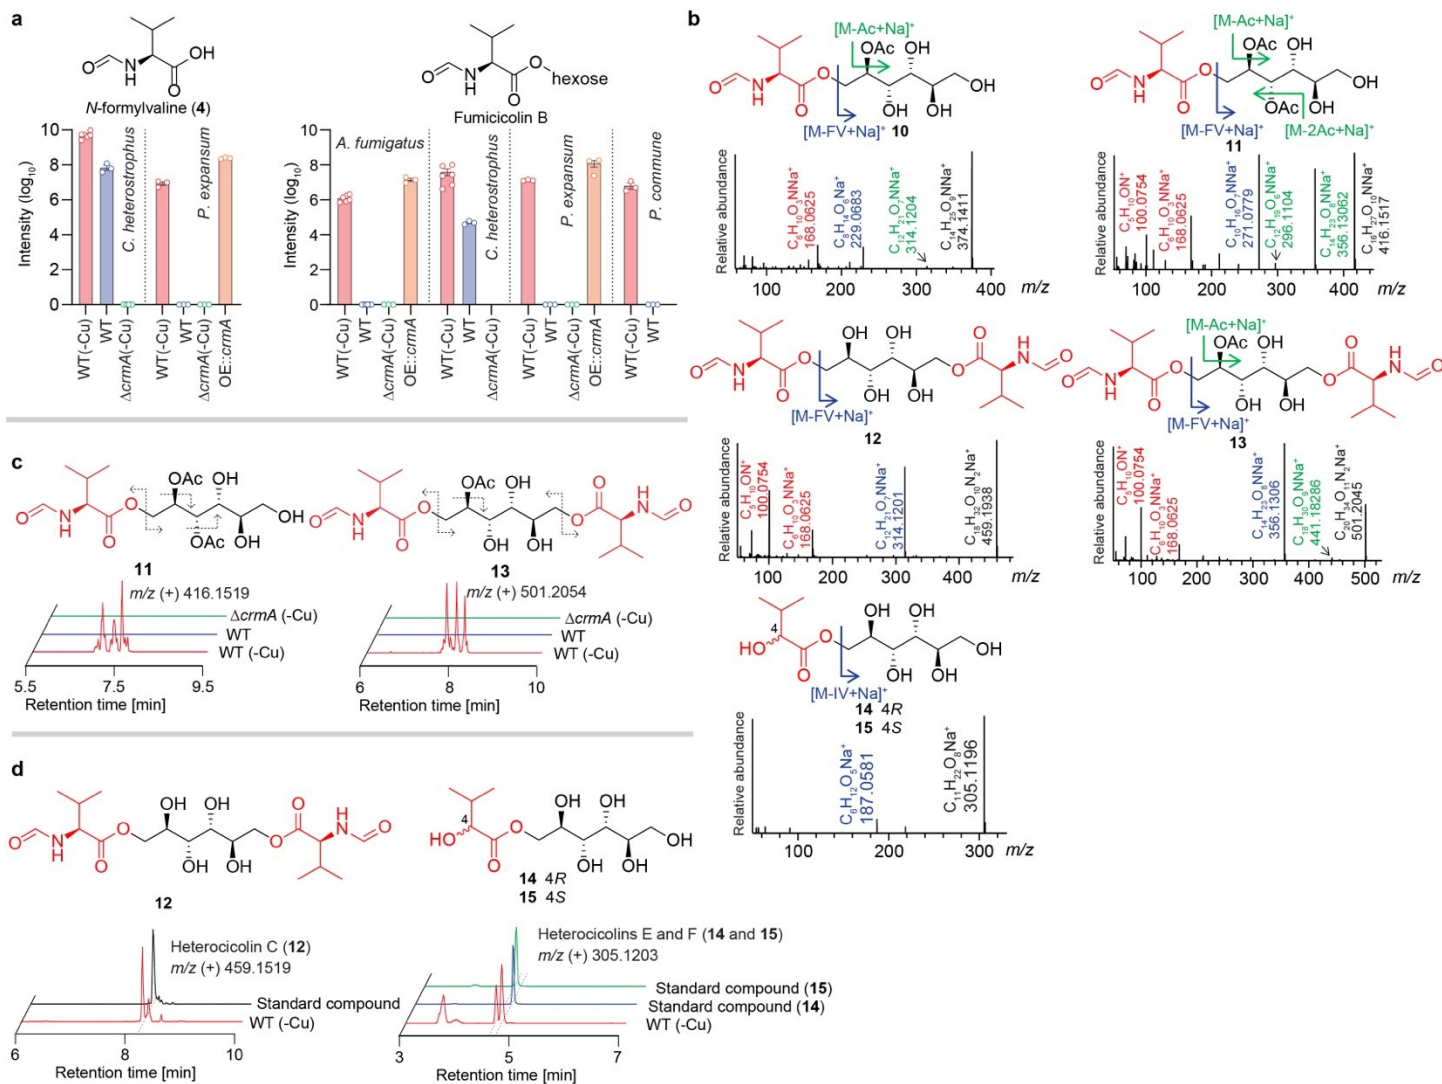

**Supplementary Figure 5.** Analysis of fumicicolin-like metabolites in different fungi. **a**, Relative abundances of *N*-formylvaline (**4**) in *C. heterostrophus* and *P. expansum*, and fumicicolin B in *A. fumigatus*, *C. heterostrophus*, and *Penicillium* spp. **b**, MS2 spectra of heterocicolins A-F (**10-15**). Red represents fragments derived from the *N*-formylvaline groups (FV, *N*-formylvaline and IV, 2-hydroxyisovaleric acid), blue represents fragments that include a D-mannitol moiety, and green represents fragments derived from loss of acetic acid (Ac). **c**, EICs of heterocicolins B (**11**) and D (**13**) in *C. heterostrophus*. WT was grown under both copper-limited (red) and copper-replete (blue) conditions, and the  $\Delta crmA$  mutant was grown under copper-limited condition (green). Dashed arrows indicate fragmentation in MS2 spectra. **d**, EICs of heterocicolins C (**12**), E (**14**), and F (**15**) in *C. heterostrophus* and comparison with synthetic standards. In **a**, bars represent mean  $\pm$  s.e.m. with six independent biological replicates for *A. fumigatus* and *C. heterostrophus* wild type under copper-limited conditions and three for the other strains, respectively. Source data are provided as a Source Data file.



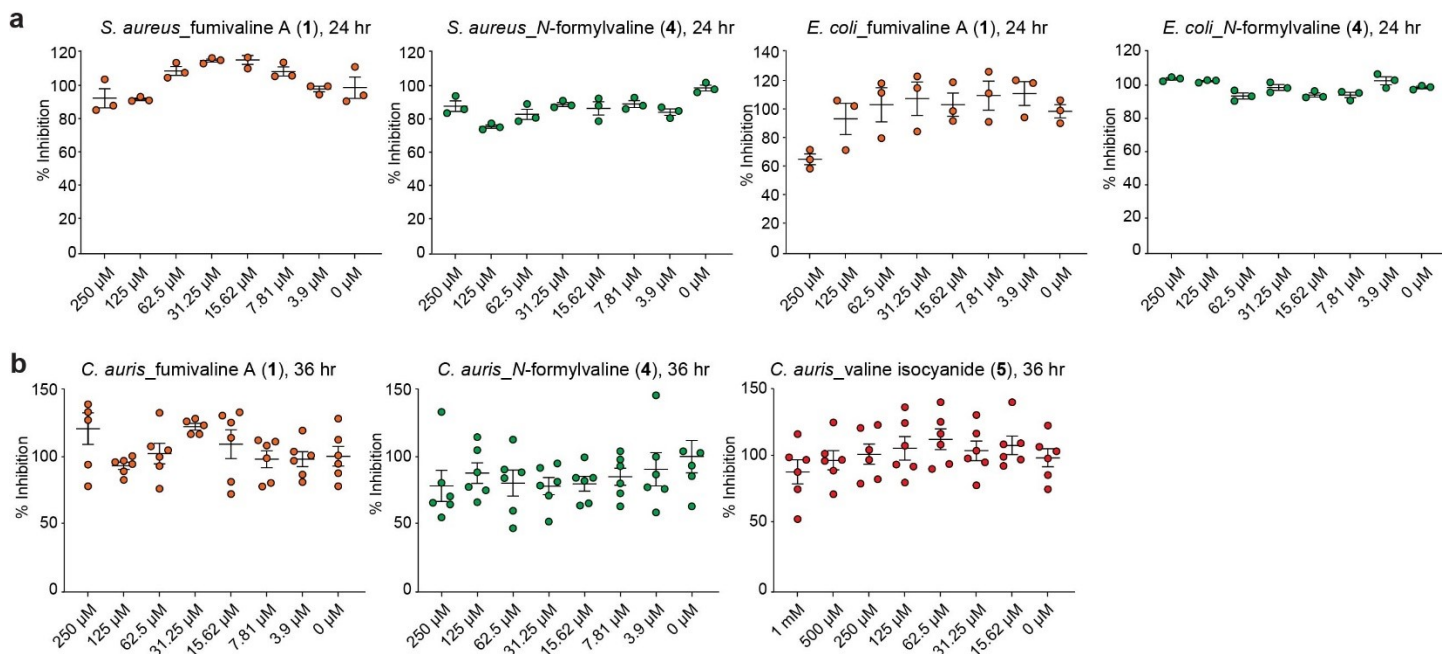

**Supplementary Figure 6.** **a**, Antimicrobial assays of fumivaline A (**1**) and *N*-formylvaline (**4**) against *E. coli* and *S. aureus*. **b**, Antimicrobial assays of fumivaline A (**1**), *N*-formylvaline (**4**), and valine isocyanide (**5**) against *C. auris*. In **a** and **b**, bars represent mean  $\pm$  s.e.m. with three independent biological replicates for *S. aureus* and *E. coli*, and six for *C. auris*. Source data are provided as a Source Data file.

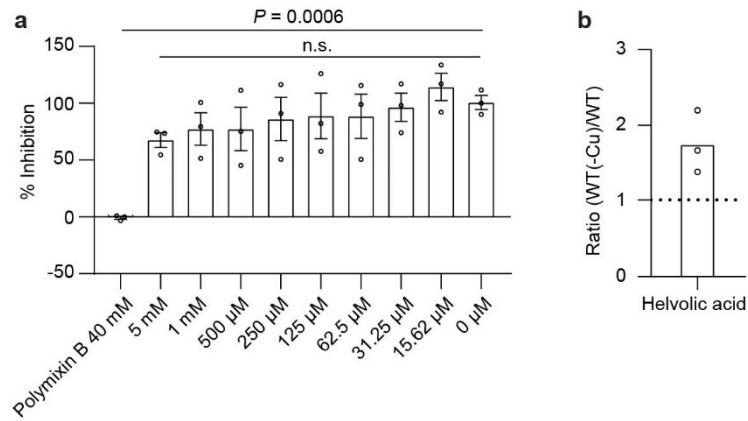

**Supplementary Figure 7.** Impact of valine isocyanide on *A. fumigatus*, and copper-dependency of helvolic acid production. **a**, Antimicrobial assays of valine isocyanide (**5**) against *A. fumigatus*. Valine isocyanide (**5**) showed no significant growth inhibition for *A. fumigatus* at all concentrations tested. Bars represent mean  $\pm$  s.e.m. with three independent biological replicates. One-way ANOVA with Dunnett's multiple comparisons test was performed to assess if the differences in survival at the range of concentrations were statistically significant (at  $p$ -value  $< 0.05$ ) from survival with solvent only (0  $\mu$ M). **b**, Copper-dependent production of helvolic acid. Abundance of helvolic acid in WT *A. fumigatus* grown under copper limited conditions relative to copper replete conditions. Bar represents mean of three independent biological replicates. Source data are provided as a Source Data file.



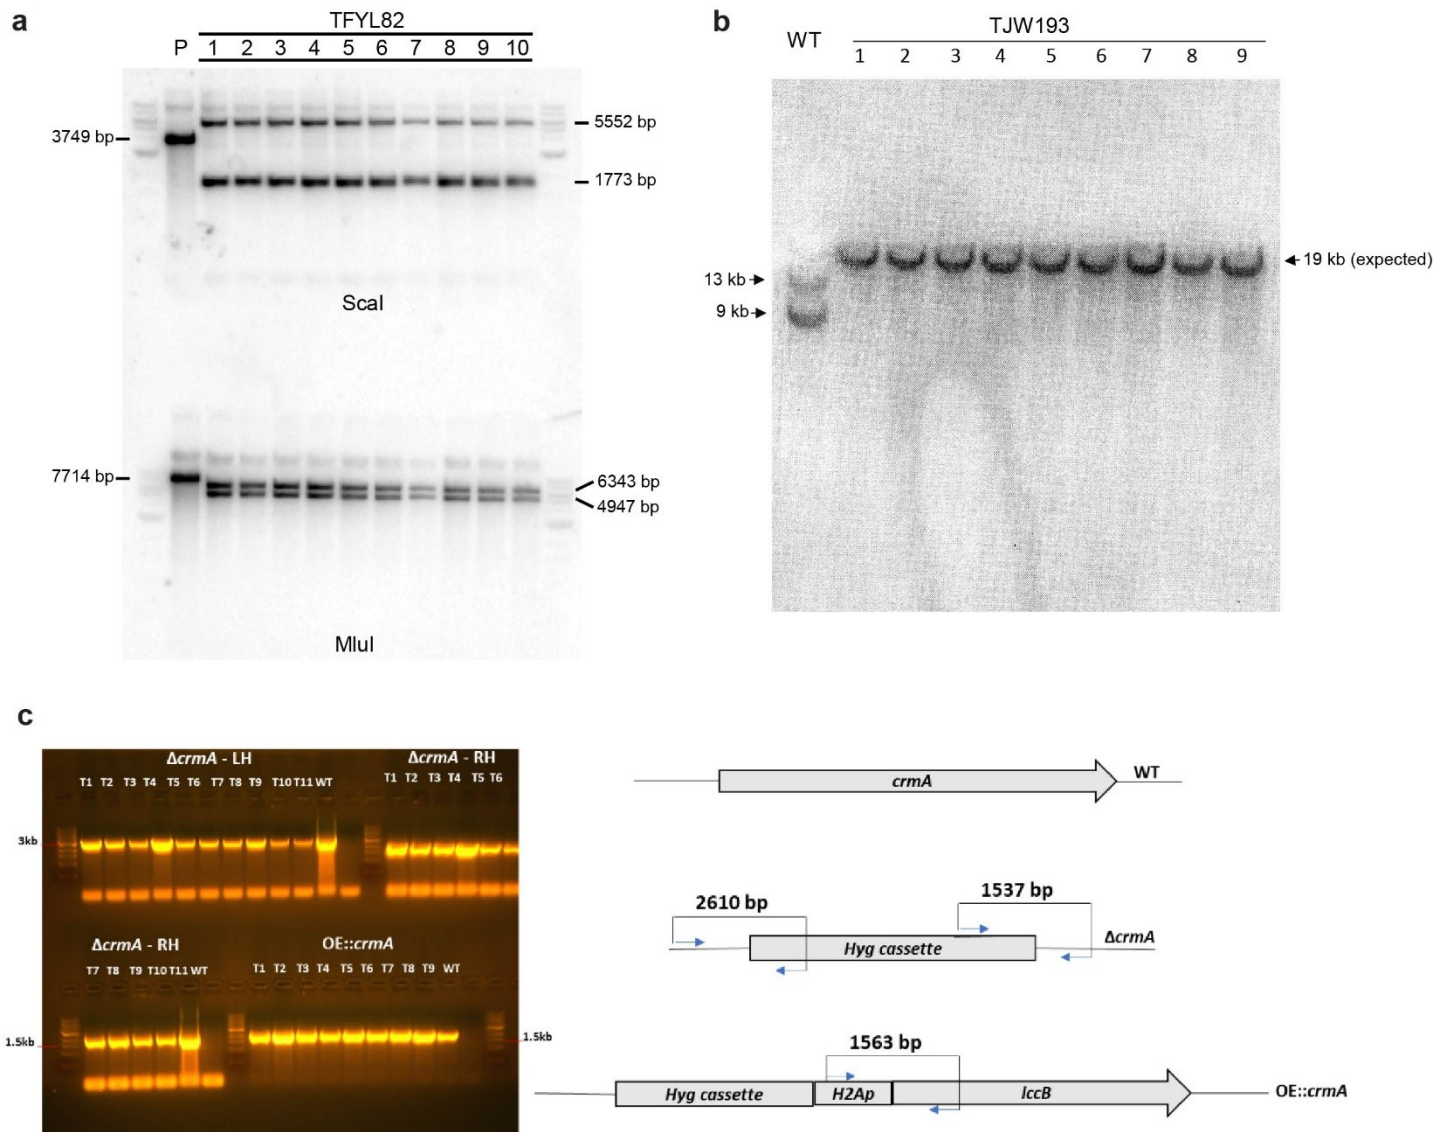

**Supplementary Figure 8.** Construction of overexpression and deletion mutants. **a**, Southern confirmation of *A. fumigatus* *crmA* overexpression (OE) mutants. Genomic DNA was digested by *Scal* and *MluI*. Parent (P, 3749 bp), and OE (5552 and 1773 bp) for *Scal* digestion; P (7714 bp), and OE (6343 and 4947 bp) for *MluI* digestion. TFYL82.2 was chosen for the subsequent experiments. **b**, Southern confirmation of *A. fumigatus* *crmBC* deletion mutants. Genomic DNA was digested by *NdeI*. WT (19 kb), and  $\Delta crmBC$  (13 and 9 kb). TJW193.3 was chosen for the subsequent experiments. **c**, PCR confirmation of *P. expansum* *crmA* mutants. Expected PCR products; for  $\Delta crmA$  LH (2610 bp) and RH (1537 bp); for OE::*crmA* (1563 bp). For all transformations, DNA was extracted from each transformant and PCR primers were used to determine if the correct genetic manipulation was achieved. PCR results were confirmed for each transformed strain with Southern blots.

## 2. Supplementary Tables

**Supplementary Table 1.** HPLC-HRMS data for compounds 1-15

| Compound      | HRESI(+/-) observed (m/z) | Ion                 | Calculated ion formula                                                         | Calculated m/z | Retention time (min)  | Yield of compound (per L culture) <sup>a</sup> |
|---------------|---------------------------|---------------------|--------------------------------------------------------------------------------|----------------|-----------------------|------------------------------------------------|
| 1             | 384.2278                  | [M+H] <sup>+</sup>  | C <sub>22</sub> H <sub>30</sub> O <sub>3</sub> N <sub>3</sub> <sup>+</sup>     | 384.2282       | 7.8                   | ~ 0.2-0.3 mg                                   |
| 2             | 241.1696                  | [M+H] <sup>+</sup>  | C <sub>16</sub> H <sub>21</sub> N <sub>2</sub> <sup>+</sup>                    | 241.1699       | 7.8, 8.1 <sup>b</sup> |                                                |
| 3             | 332.1306                  | [M+Na] <sup>+</sup> | C <sub>12</sub> H <sub>23</sub> O <sub>8</sub> NNa <sup>+</sup>                | 332.1316       | 5.0                   |                                                |
| 4             | 144.0667                  | [M-H] <sup>-</sup>  | C <sub>6</sub> H <sub>10</sub> O <sub>3</sub> N <sup>-</sup>                   | 144.0666       | 5.5                   | ~0.1mg                                         |
| 5             | 126.0558                  | [M-H] <sup>-</sup>  | C <sub>6</sub> H <sub>8</sub> O <sub>2</sub> N <sup>-</sup>                    | 126.0561       | 6.9                   |                                                |
| 10            | 374.1411                  | [M+Na] <sup>+</sup> | C <sub>14</sub> H <sub>25</sub> O <sub>9</sub> NNa <sup>+</sup>                | 374.1422       | 5.9                   |                                                |
| 11            | 416.1519                  | [M+Na] <sup>+</sup> | C <sub>16</sub> H <sub>27</sub> O <sub>10</sub> NNa <sup>+</sup>               | 416.1527       | 7.0-7.7               |                                                |
| 12            | 459.1944                  | [M+Na] <sup>+</sup> | C <sub>18</sub> H <sub>32</sub> O <sub>10</sub> N <sub>2</sub> Na <sup>+</sup> | 459.1949       | 7.2                   |                                                |
| 13            | 501.2054                  | [M+Na] <sup>+</sup> | C <sub>20</sub> H <sub>34</sub> O <sub>11</sub> N <sub>2</sub> Na <sup>+</sup> | 501.2055       | 8.0-8.6               |                                                |
| 14            | 305.1203                  | [M+Na] <sup>+</sup> | C <sub>11</sub> H <sub>22</sub> O <sub>8</sub> Na <sup>+</sup>                 | 305.1207       | 3.5                   |                                                |
| 15            | 305.1203                  | [M+Na] <sup>+</sup> | C <sub>11</sub> H <sub>22</sub> O <sub>8</sub> Na <sup>+</sup>                 | 305.1207       | 3.5                   |                                                |
| Fumivaline B  | 400.2228                  | [M+H] <sup>+</sup>  | C <sub>22</sub> H <sub>30</sub> O <sub>4</sub> N <sub>3</sub> <sup>+</sup>     | 400.2231       | 5.2                   |                                                |
| Fumicicolin B | 330.1157                  | [M+Na] <sup>+</sup> | C <sub>12</sub> H <sub>21</sub> O <sub>8</sub> NNa <sup>+</sup>                | 330.1159       | 5.0-5.5               |                                                |

<sup>a</sup>Numbers indicate estimated production of each compound based on peak areas for the molecular ions in fresh extracts compared to synthetic or isolated samples.

<sup>b</sup>Numbers indicate retention times for festuclavine and pyroclavine.

**Supplementary Table 2.** Calculation of relative abundances of hydrogen isotopes in extracts from the deuterium labeling experiment

| Solvent                                      | Molecular weight [g/mol] | Volume used [mL] | Density [g/mL] | Amount [mol]           | Contribution to corresponding hydrogen isotope abundance in the extracts* |
|----------------------------------------------|--------------------------|------------------|----------------|------------------------|---------------------------------------------------------------------------|
| Water (H <sub>2</sub> O)                     | 18.0                     | 5.0              | 0.997          | 5 x 0.997/18 = 0.277   | 0.277 x 2 = 0.554 (H)                                                     |
| Deuterium oxide (D <sub>2</sub> O)           | 20.0                     | 1.5              | 1.110          | 1.5 x 1.110/20 = 0.083 | 0.083 x 2 = 0.166 (D)                                                     |
| Methanol-d <sub>1</sub> (CH <sub>3</sub> OD) | 33.0                     | 3.5              | 0.813          | 3.5 x 0.813/33 = 0.086 | 0.086 x 1 = 0.086 (D)                                                     |

\*As a result, the ratio of protium to deuterium in the extract solvent is 0.554/(0.166+0.086) = 2.2, corresponding to a deuteration level of (0.166+0.086)/(0.166+0.086+0.554) = 31.3%.

**Supplementary Table 3.** Accession number, putative functions, and sequence identity with the ThiJ/Pfpl family protein in *Pseudomonas putida*, of homologous proteins in *A. fumigatus*

| E value | Identity (%) | Accession number in <i>A. fumigatus</i> | Putative function                   |
|---------|--------------|-----------------------------------------|-------------------------------------|
| 6e-24   | 32.86%       | XP_753233.1                             | ThiJ/Pfpl family protein            |
| 3e-15   | 31.53%       | XP_746317.2                             | ThiJ/Pfpl family protein            |
| 2e-14   | 35.94%       | XP_748565.1                             | ThiJ/Pfpl transcriptional regulator |
| 4e-11   | 32.30%       | XP_754934.1                             | ThiJ/Pfpl family protein            |
| 2e-09   | 26.03%       | XP_748075.1                             | ThiJ/Pfpl family protein            |

**Supplementary Table 4.** Accession numbers and sequence identity of the CrmA and the ergot alkaloid synthases in *A. fumigatus* with homologous proteins in *P. commune*

| Gene name in <i>A. fumigatus</i> | Gene name in <i>Claviceps purpurea</i> | <i>A. fumigatus</i> | <i>P. commune</i><br>( <i>P. commune</i> 162_3FA) <sup>1</sup> |
|----------------------------------|----------------------------------------|---------------------|----------------------------------------------------------------|
| <i>crmA</i>                      | <i>crmA</i>                            | Q4WYN6.2            | Pc.00g057360 (60%)                                             |
| <i>fgaOx3</i>                    | <i>easA</i>                            | XP_756133.1         | AFM84626.1 (64%)                                               |
| <i>fgaFS</i>                     | <i>easG</i>                            | XP_756134.1         | AFM84625.1 (61%)                                               |
| <i>fgaDH</i>                     | <i>easD</i>                            | XP_756137.1         | Pc.00g221860 (73%)                                             |
| <i>fgaCat</i>                    | <i>easC</i>                            | XP_756140.1         | Pc.00g221830 (64%)                                             |
| <i>fgaPT2</i>                    | <i>dmaW</i>                            | XP_756141.1         | Pc.00g221850 (63%)                                             |
| <i>fagOX1</i>                    | <i>easE</i>                            | XP_756142.1         | Pc.00g221840.1 (49%)                                           |
| <i>gaMT</i>                      | <i>easF</i>                            | XP_756143.1         | Pc.00g221840.2 (61%)                                           |

**Supplementary Table 5.** Antimicrobial susceptibility of various bacteria and yeast against extracts from different *A. fumigatus* strains grown in normal copper and copper devoid media.

| Microorganism          | <i>A.fumigatus</i> strain | Copper condition | Zone of inhibition (in cm, 3 replicates) |
|------------------------|---------------------------|------------------|------------------------------------------|
| <i>C. auris</i>        | Wildtype                  | -Cu              | nd*, 1.1, 1.8                            |
|                        | $\Delta crmA$             |                  | nd, nd, nd                               |
|                        | OE:: <i>crmA</i>          |                  | 1.7, 1.8, 1.9                            |
|                        | Wildtype                  | +Cu              | nd, nd, nd                               |
|                        | $\Delta crmA$             |                  | nd, nd, nd                               |
|                        | OE:: <i>crmA</i>          |                  | nd, nd, nd                               |
| <i>C. albicans</i>     | Wildtype                  | -Cu              | nd, nd, 1.7                              |
|                        | $\Delta crmA$             |                  | nd, nd, nd                               |
|                        | OE:: <i>crmA</i>          |                  | 1.7, 1.8, 1.7                            |
|                        | Wildtype                  | +Cu              | nd, nd, nd                               |
|                        | $\Delta crmA$             |                  | nd, nd, nd                               |
|                        | OE:: <i>crmA</i>          |                  | nd, nd, nd                               |
| <i>S. aureus</i>       | Wildtype                  | -Cu              | nd, 1.3, 1.6                             |
|                        | $\Delta crmA$             |                  | nd, nd, nd                               |
|                        | OE:: <i>crmA</i>          |                  | nd, 1.6, 1.5                             |
|                        | Wildtype                  | +Cu              | nd, nd, nd                               |
|                        | $\Delta crmA$             |                  | nd, nd, nd                               |
|                        | OE:: <i>crmA</i>          |                  | nd, nd, nd                               |
| <i>P. aeruginosa</i>   | Wildtype                  | -Cu              | nd, nd, nd                               |
|                        | $\Delta crmA$             |                  | nd, nd, nd                               |
|                        | OE:: <i>crmA</i>          |                  | nd, nd, nd                               |
|                        | Wildtype                  | +Cu              | nd, nd, nd                               |
|                        | $\Delta crmA$             |                  | nd, nd, nd                               |
|                        | OE:: <i>crmA</i>          |                  | nd, nd, nd                               |
| <i>A.brassicicola</i>  | Wildtype                  | -Cu              | nd, 1.1, 2.4                             |
|                        | $\Delta crmA$             |                  | nd, nd, nd                               |
|                        | OE:: <i>crmA</i>          |                  | 2.1, 2.5, 2.7                            |
|                        | Wildtype                  | +Cu              | nd, nd, nd                               |
|                        | $\Delta crmA$             |                  | nd, nd, nd                               |
|                        | OE:: <i>crmA</i>          |                  | nd, nd, nd                               |
| <i>P.expansum</i>      | Wildtype                  | -Cu              | nd, 0.9, 1.1                             |
|                        | $\Delta crmA$             |                  | nd, nd, nd                               |
|                        | OE:: <i>crmA</i>          |                  | 1.1, 1.4, 1.2                            |
|                        | Wildtype                  | +Cu              | nd, nd, nd                               |
|                        | $\Delta crmA$             |                  | nd, nd, nd                               |
|                        | OE:: <i>crmA</i>          |                  | nd, nd, nd                               |
| <i>E.coli</i>          | Wildtype                  | -Cu              | nd, 1.0, 1.4                             |
|                        | $\Delta crmA$             |                  | nd, nd, nd                               |
|                        | OE:: <i>crmA</i>          |                  | 1.4, 1.7, 1.5                            |
|                        | Wildtype                  | +Cu              | nd, nd, nd                               |
|                        | $\Delta crmA$             |                  | nd, nd, nd                               |
|                        | OE:: <i>crmA</i>          |                  | nd, nd, nd                               |
| <i>L.monocytogenes</i> | Wildtype                  | -Cu              | nd, 2.1, 2.2                             |
|                        | $\Delta crmA$             |                  | nd, nd, nd                               |
|                        | OE:: <i>crmA</i>          |                  | 2.4, 2.6, 2.4                            |
|                        | Wildtype                  | +Cu              | nd, nd, nd                               |
|                        | $\Delta crmA$             |                  | nd, nd, nd                               |
|                        | OE:: <i>crmA</i>          |                  | nd, nd, nd                               |

\*Not detected.

**Supplementary Table 6.** Fungal and bacterial strains used in this study

| Name                                        | Genotype                                                                                       | Reference                                |
|---------------------------------------------|------------------------------------------------------------------------------------------------|------------------------------------------|
| <u><i>A. fumigatus</i></u>                  |                                                                                                |                                          |
| TFYL45                                      | $\Delta nkuA::mluc$ ; <i>pyrG1</i> ; <i>argB1</i>                                              | Ref <sup>2</sup>                         |
| TFYL81                                      | <i>fumipyrG</i> ; <i>fumiargB</i> ; $\Delta nkuA::mluc$ ; <i>pyrG1</i> ; <i>argB1</i>          | Ref <sup>2</sup>                         |
| TFYL80.1                                    | <i>fumiargB</i> ; $\Delta nkuA::mluc$ ; <i>pyrG1</i> ; <i>argB1</i>                            | Ref <sup>2</sup>                         |
| TFYL93                                      | $\Delta crmA::fumiargB$ ; <i>fumipyrG</i> ; $\Delta nkuA::mluc$ ; <i>pyrG1</i> ; <i>argB1</i>  | Ref <sup>2</sup>                         |
| TFYL89.1                                    | $\Delta crmCD::fumiargB$ ; $\Delta nkuA::mluc$ ; <i>fumipyrG</i> ; <i>pyrG1</i> ; <i>argB1</i> | Ref <sup>2</sup>                         |
| TFYL82.2                                    | <i>parapyrG::gpdA(p)::crmA</i> ; <i>pyrG1</i> ; <i>argB1</i>                                   | This study                               |
| TJW193.3                                    | $\Delta crmBC::parapyrG$ ; <i>fumiargB</i> ; $\Delta nkuA::mluc$ ; <i>pyrG1</i> ; <i>argB1</i> | This study                               |
| TTC32.1                                     | $\Delta dmaW::parapyrG$ ; <i>fumiargB</i> ; $\Delta nkuA$ ; <i>pyrG1</i> ; <i>argB1</i>        | Ref <sup>3</sup>                         |
| <u><i>Penicillium expansum</i></u>          |                                                                                                |                                          |
| TJT14.1                                     | $\Delta ku$                                                                                    | Ref <sup>4</sup>                         |
| TCG7                                        | $\Delta ku$ ; <i>H2A(p)::062980::hygB</i>                                                      | This study                               |
| TCG8                                        | $\Delta ku$ ; $\Delta 062980::hygB$                                                            | This study                               |
| Other fungi                                 |                                                                                                |                                          |
| <i>P. commune</i>                           | WT                                                                                             | Ref <sup>1</sup>                         |
| <i>Cochliobolus heterostrophus</i>          | WT race O strain C5                                                                            | Ref <sup>5</sup>                         |
| <i>C. heterostrophus</i>                    | $\Delta crmA$                                                                                  | This study                               |
| <i>Alternaria brassicicola</i> ATCC96836    | WT                                                                                             | Strain from Dr.Mehdi Kabbage, UW-Madison |
| <i>Candida albicans</i> SC5314              | WT                                                                                             | Strain from Dr.David Andes, UW-Madison   |
| <i>Candida auris</i> B11804                 | WT                                                                                             | Strain from Dr.David Andes, UW-Madison   |
| Bacteria                                    |                                                                                                |                                          |
| <i>Listeria monocytogenes</i> 10403S        | mCherry::ChIR (chromosomal integration)                                                        | Ref <sup>6</sup>                         |
| <i>Escherichia coli</i> UT189               | GFP (pGEN-GFP LVA)::AmpR                                                                       | Ref <sup>7</sup>                         |
| <i>Staphylococcus aureus</i> (MRSA) FPR3757 | dsRed::chIR<br>( $\beta$ -lactamase deactivated)                                               | Strain from Dr. J D Sauer,<br>UW-Madison |
| <i>Pseudomonas aeruginosa</i> PaO1          | GFP (pSMC2)::CarbenicillinR                                                                    | Ref <sup>8</sup>                         |

**Supplementary Table 7.** PCR primers for this study

| Name                                    | Sequence (5'-3')                                                | Use              |
|-----------------------------------------|-----------------------------------------------------------------|------------------|
| <i>Aspergillus fumigatus</i> work       |                                                                 |                  |
| crmDkoBCF                               | CTGGGTTGGTTATGTGTTGACGG                                         | ΔcrmBC           |
| crmDkoBCR                               | CGATATCAAGCTATCGATACCTCGACTCAT<br>GCACCACAACGACCACAGCAACGGGATGC | ΔcrmBC<br>ΔcrmBC |
| ParapyrGF                               | GAGTCGAGGTATCGATAGCTTG                                          | ΔcrmBC           |
| ParapyrGR                               | ATTCGACAATCGGAGAGGCTGC                                          | ΔcrmBC           |
| crmAkoBCF                               | GTCGCTGCAGCCTCTCCGATTGTCGAATA<br>TGCATCACTCCGACAGAATGTTTCACAAGG | ΔcrmBC<br>ΔcrmBC |
| crmAkoBCR                               | AGCCAGTCTTGGTGTTCAGCAGGG                                        | ΔcrmBC           |
| OE3G13690 5'F FOR                       | GTCTTGCTCTTCGGCCGC                                              | CrmA OE          |
| OE3G13690 5'F REV                       | ATTCGCCCTATAGTGAGTCGTATTAC<br>GGTACTGCACTGTGATGGGGCC            | CrmA OE          |
| OE3G13690 3'F FOR                       | CAGTACCCCGCTTGAGCAGACATCAC<br>CATGCATCACTCCGACAGAATGTTTC        | CrmA OE          |
| OE3G13690 3'F REV                       | GATGAGGAGGTGGAAGCAGCAC                                          | CrmA OE          |
| OE3G13690 nest FOR                      | GGCGAAGTGAGGATTCGGAG                                            | CrmA OE          |
| OE3G13690 nest REV                      | GATGAGGAGGTGGAAGCAGCAC                                          | CrmA OE          |
| Extended T7 FOR                         | CGTAATACGACTCACTATAGGG                                          | CrmA OE          |
| gpdA(p) fusion REV                      | GGTGATGTCTGCTCAAG                                               | CrmA OE          |
| fumargBF                                | AGCCGAACGTGGCAATAGAACG                                          | Complementation  |
| fumargBR                                | TCTGGGACTGACAGACCTTAGC                                          | Complementation  |
| <i>Penicillium expansum</i> work        |                                                                 |                  |
| PEX2_062980-LH-F                        | TAATGCCAACTTTGTACAAAAAAGCAG<br>GCTCCAACCCACCAACCTTGGAA          | Deletion/OE      |
| PEX2_062980-LH-F-int                    | CCTTGGGAATGGGCTGAGTTTTAG                                        | Deletion/OE      |
| PEX2_062980-LH-R                        | TATTGACCTATAGGACCTGAGTGAT<br>GCGGACTATATCTGGCCGGTAGG            | Deletion/OE      |
| PEX2_062980OE_ORF_F                     | TACAACATTTTAACCACTTAATCA<br>GACAAAATGGCTTCGCTGGACCC             | OE               |
| PEX2_062980-ORF-Rin                     | GCTGTCTTGGCTGAACTCG                                             | OE               |
| PEX2_062980-ORF-R                       | AATGCCAACTTTGTACAAGAAAGCT<br>GGGTCGATACGGTGCAGCCTTTCTT          | OE               |
| PEX2_062980-KO-RH-F                     | GTTGAGCATAATATGGTCCATCTAGT<br>GCCGTTAGACGGCGAACTCCA             | Deletion         |
| PEX2_062980-KO-RH-Rin                   | CGCCACGAAGATCATCGAC                                             | Deletion         |
| PEX2_062980-KO-RH-R                     | AATGCCAACTTTGTACAAGAAAGCTGGG<br>TCGAGGTCATCGATTCCGGACAG         | Deletion         |
| PEX2_062980-checkLH-F                   | CCGCAAGATCACATCAACCC                                            | Confirmation     |
| PEX2_062980-checkLH-R                   | GCAGTTGGTTCTTCGAGTCTGA                                          | Confirmation     |
| PEX2_062980-checkRH-F                   | GCCGATGCAAAGTGCCGATA                                            | Confirmation     |
| PEX2_062980-checkRH-R                   | GGTTCATGATCAACAAGCCCGGGA                                        | Confirmation     |
| PEX2_062980-check-OE-R                  | GACATAAGCATTGACATCAATG                                          | Confirmation     |
| PEX2_062980-check-OE-F                  | GGAGCACTGGACCATGATCT                                            | Confirmation     |
| <i>Cochliobolus heterostrophus</i> work |                                                                 |                  |

|                               |                                                        |              |
|-------------------------------|--------------------------------------------------------|--------------|
| <i>ChC5_1220253-UpF</i>       | GACGCCATGCCTACTAATCC                                   | Confirmation |
| <i>ChC5_1220253-DownR</i>     | GTCCACGCCATGGTAGTAGC                                   | Confirmation |
| <i>ChC5_1220253-intF</i>      | GGCAGTGCTAGAGGCAACTC                                   | Confirmation |
| <i>ChC5_1220253-intR</i>      | TGCGCAGATAAACTTTGACG                                   | Confirmation |
| <i>ChC5_1220253-FP1</i>       | CGATCGTCTCACTGTGCTTG                                   | Deletion     |
| <i>ChC5_1220253-RP1(M13R)</i> | tcctgtgtgaaattgttatccgct<br>AGTATGTGCCAGGCTTCTG        | Deletion     |
| <i>ChC5_1220253-FP2(M13F)</i> | gtcgtgactgggaaaaccctggcg<br>TCAACTTCCATTTTCCAGACAGTTTC | Deletion     |
| <i>ChC5_1220253-RP2</i>       | CGACTGTTCCGAACTGACAAC                                  | Deletion     |
| M13R                          | AGCGGATAACAATTTTCCAGGACAGGA                            | Deletion     |
| M13F                          | CGCCAGGGTTTTCCAGTCACGAC                                | Deletion     |
| NLC37                         | GGATGCCTCCGCTCGAAGTA                                   | Deletion     |
| NLC38                         | CGTTGCAAGACCTGCCTGAA                                   | Deletion     |

---



### 3. Supplementary Methods

#### Synthesis of fumicicolin A (**3**) and heterocicolin C (**12**)

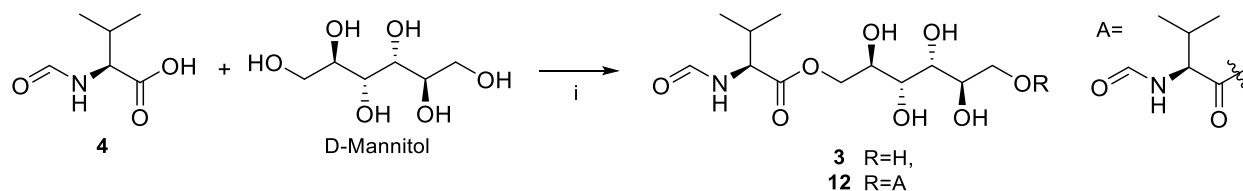

(i) To a stirred solution of *N*-formylvaline (TCI America, 145 mg, 1 mmol), 4-dimethylaminopyridine (488 mg, 4 mmol, 4.0 equiv.), and 1-ethyl-3-(3-dimethylaminopropyl) carbodiimide hydrochloride (383 mg, 2 mmol, 2.0 equiv.) in 2 mL of *N,N*-dimethylformamide was added D-mannitol (Sigma, 200 mg, 1.1 mmol, 1.1 equiv.). The reaction mixture was stirred at room temperature for 2 hr. The resulting mixture was concentrated *in vacuo*. Purification by flash chromatography on a reverse-phase column (C18) using a gradient of 0-50 % acetonitrile in 0.1 % acetic acid afforded fumicicolin A (**3**, 150 mg, 45 %) and heterocicolin C (**12**, 150 mg, 45 %).

Fumicicolin A (**3**): HRMS (ESI)  $m/z$ :  $[M+Na]^+$  calcd for  $C_{12}H_{23}NO_8Na^+$  332.1316; found 332.1311.

Heterocicolin C (**12**): HRMS (ESI)  $m/z$ :  $[M+Na]^+$  calcd for  $C_{18}H_{32}N_2O_{10}Na^+$  459.1949; found 459.1944. See next section for NMR spectroscopic data and spectra.

#### Synthesis of (*S*)-2-isocyanoisovaleric acid (**5**)

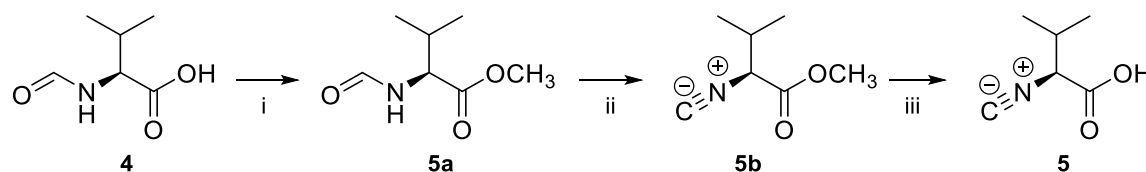

(i) To a stirred solution of *N*-formylvaline (TCI America, 145 mg, 1 mmol) in 1 mL of methanol was added (trimethylsilyl)diazomethane (*ca.* 0.6 mol/L solution in hexane, 2 mL, 1.2 mmol, 1.2 equiv.). The reaction mixture was stirred at room temperature for 24 hr, then quenched with the dropwise addition of acetic acid until the yellow color of the reaction mixture disappeared and bubbling ceased. The resulting mixture was concentrated *in vacuo*. Purification by flash column chromatography on silica using a gradient of 0-10% methanol in dichloromethane afforded *N*-formylvaline methyl ester (**5a**, 155 mg, 97 %). HRMS (ESI)  $m/z$ :  $[M-H]^-$  calcd for  $C_7H_{12}NO_3^-$  158.0823; found 158.0822.  $^1H$  NMR, 600 MHz, chloroform-*d*:  $\delta$  (ppm) Major rotamer: 8.24 (s, 1H), 6.30 (m, 1H) 4.64 (dd,  $J = 9.0, 4.8$  Hz, 1H), 3.74 (s, 3H), 2.18 (m, 1H), 0.95 (d,  $J = 6.7$  Hz, 3H), 0.90 (d,  $J = 6.6$  Hz, 3H). Minor rotamer: 7.98 (d,  $J = 11.8$  Hz, 1H), 6.30 (m, 1H), 4.51 (dd,  $J = 10.2, 5.2$  Hz, 1H), 3.76 (s, 3H), 2.32 (m, 1H), 0.97 (d,  $J = 6.6$  Hz, 3H), 0.89 (m, 3H).

(ii) To a stirred solution of *N*-formylvaline methyl ester (**5a**, 143 mg, 0.9 mmol) in 9 mL dichloromethane was added triethylamine (626  $\mu$ L, 4.5 mmol, 5 equiv.), followed by the dropwise addition of phosphoryl chloride (103  $\mu$ L, 1.1 mmol, 1.2 eq) at  $-20$   $^\circ$ C. The reaction mixture was stirred for 4 hr, then quenched with the dropwise addition of water (0.9 mL) at  $-20$   $^\circ$ C. The organics were extracted three times with dichloromethane. Combined organics were washed with brine, dried with sodium sulfate, filtered, and concentrated *in vacuo*. Purification by

flash column chromatography on silica using a gradient of 0-10% methanol in dichloromethane afforded (*S*)-2-isocyanoisovaleric acid methyl ester (**5b**, 95 mg, 67 %).

HRMS (ESI)  $m/z$ :  $[M-H]^-$  calcd for  $C_7H_{10}NO_2^-$  140.0717; found 140.0716.

$^1H$  NMR, 600 MHz, methanol- $d_4$ :  $\delta$  (ppm) 4.51 (d,  $J = 4.0$  Hz, 1H), 3.79 (s, 3H), 2.32 (m, 1H), 1.08 (d,  $J = 6.7$  Hz, 3H), 0.95 (d,  $J = 6.7$  Hz, 3H).

(iii) To a stirred solution of (*S*)-2-isocyanoisovaleric acid methyl ester (**5b**, 13 mg, 0.092 mmol) in 1 mL of 1,4-dioxane was added lithium hydroxide (2.4 mg, 0.1 mmol, 1.1 eq), followed by the addition of 1 mL of water. The reaction mixture was stirred at room temperature for 1 hr, and the organics were extracted with ethyl acetate (3x). The resulting solution was concentrated *in vacuo* to afford (*S*)-2-isocyanoisovaleric acid (**5**, 11 mg, 0.086 mmol, 94 %).

HRMS (ESI)  $m/z$ :  $[M-H]^-$  calcd for  $C_6H_8NO_2^-$  126.0561; found 126.0558. See next section for NMR spectroscopic data and spectra.

### Synthesis of heterocicolins E and F (**14** and **15**)

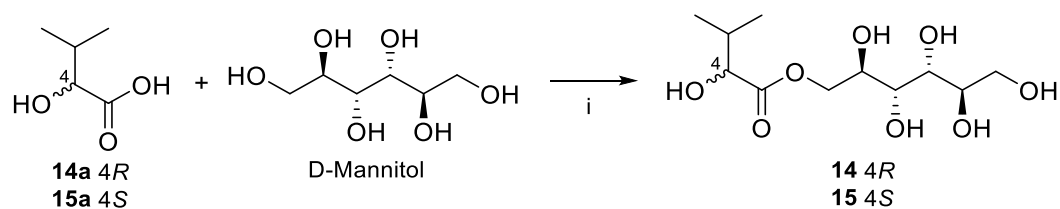

(i) To a stirred solution of (*R*)-(-)-2-hydroxyisovaleric acid (**14a**, VWR, 118 mg, 1 mmol), 4-dimethylaminopyridine (488 mg, 4 mmol, 4.0 equiv.), and 1-ethyl-3-(3-dimethylaminopropyl) carbodiimide hydrochloride (383 mg, 2 mmol, 2.0 equiv.) in 2 mL of *N,N*-dimethylformamide was added D-mannitol (Sigma, 200 mg, 1.1 mmol, 1.1 equiv.). The reaction mixture was stirred at room temperature for 2 hr. The resulting mixture was concentrated *in vacuo*. Purification by flash chromatography on a reverse phase column (C18) using a gradient of 0-5 % acetonitrile in 0.1 % acetic acid afforded heterocicolin E (**14**, 65 mg, 23 %). The same procedure was performed with (*S*)-(+)-2-hydroxyisovaleric acid (**15a**, VWR, 118 mg, 1 mmol) as an alternative to (*R*)-(-)-2-hydroxyisovaleric acid for synthesis of heterocicolin F (**15**, 65 mg, 23 %).

Heterocicolin E (**14**): HRMS (ESI)  $m/z$ :  $[M+Na]^+$  calcd for  $C_{11}H_{22}O_8Na^+$  305.1207; found 305.1203. See next section for NMR spectroscopic data and spectra.

Heterocicolin F (**15**): HRMS (ESI)  $m/z$ :  $[M+Na]^+$  calcd for  $C_{11}H_{22}O_8Na^+$  305.1207; found 305.1203. See next section for NMR spectroscopic data and spectra.

#### 4. NMR Spectroscopic Data and Spectra

##### <sup>1</sup>H (800 MHz) and <sup>13</sup>C (201 MHz) NMR spectroscopic data for fumivaline A (1) in methanol-*d*<sub>4</sub>

Chemical shifts were referenced to  $\delta(\text{CHD}_2\text{OD}) = 3.31$  and  $\delta(^{13}\text{C}\text{HD}_2\text{OD}) = 49.0$ . <sup>13</sup>C chemical shifts were determined via HMBC and HSQC spectra. One-bond (<sup>13</sup>C,<sup>1</sup>H)-*J*-coupling constants were determined from the acquired HSQC spectra. (<sup>1</sup>H,<sup>1</sup>H)-*J*-coupling constants were determined from the <sup>1</sup>H or dqfCOSY spectra. HMBC correlations are from the proton(s) stated to the indicated <sup>13</sup>C atom.

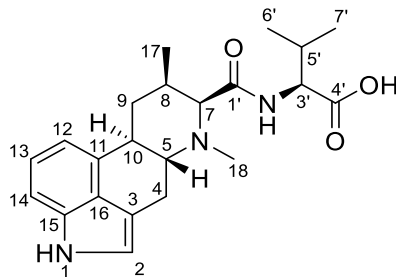

Fumivaline A (1)

| No. | $\delta_c$ | Proton                            | <sup>1</sup> <i>J</i> <sub>CH</sub> | $\delta H$ ( <i>J</i> <sub>HH</sub> [Hz])                                                                                                       | HMBC            | NOESY                      |
|-----|------------|-----------------------------------|-------------------------------------|-------------------------------------------------------------------------------------------------------------------------------------------------|-----------------|----------------------------|
| 2   | 117.9      | 2-H                               | 182.5                               | 6.90                                                                                                                                            | 4b              |                            |
| 3   | 109.9      |                                   |                                     |                                                                                                                                                 | 2, 4b           |                            |
| 4   | 26.6       | 4-H <sub>a</sub><br>(4 $\alpha$ ) | 126.4                               | 2.56 ( <i>J</i> <sub>4a,4b</sub> = 13.5 Hz, <i>J</i> <sub>4a,5</sub> = 11.0 Hz)                                                                 |                 | 10                         |
|     |            | 4-H <sub>b</sub><br>(4 $\beta$ )  |                                     | 3.42 ( <i>J</i> <sub>4b,4a</sub> = 13.5 Hz, <i>J</i> <sub>4b,5</sub> = 4.0 Hz)                                                                  |                 |                            |
| 5   | 60.3       | 5-H                               | 138.5                               | 3.72 ( <i>J</i> <sub>5,4a</sub> = 11.0 Hz, <i>J</i> <sub>5,4b</sub> = 4.0 Hz, <i>J</i> <sub>5,10</sub> = 11.0 Hz)                               | 4b, 9ab, 18     | 9 $\beta$                  |
| 7   | 69.1       | 7-H                               | 139.8                               | 3.73 ( <i>J</i> <sub>7,8</sub> = 5.5 Hz)                                                                                                        | 9ab, 17, 18     | 8, 17                      |
| 8   | 32.8       | 8-H                               | 124.6                               | 2.31 ( <i>J</i> <sub>8,7</sub> = 5.5 Hz, <i>J</i> <sub>8,9a</sub> = 3.0, <i>J</i> <sub>8,9b</sub> = 12.5 Hz, <i>J</i> <sub>8,17</sub> = 7.0 Hz) | 9ab, 17         | 7, 10                      |
| 9   | 30.3       | 9-H <sub>a</sub><br>(9 $\beta$ )  | 130.0                               | 1.93 ( <i>J</i> <sub>9a,9b</sub> = 12.5 Hz, <i>J</i> <sub>9a,8</sub> = 3.0 Hz, <i>J</i> <sub>9a,10</sub> = 4.0 Hz)                              | 17              | 5                          |
|     |            | 9-H <sub>b</sub><br>(9 $\alpha$ ) |                                     | 2.37 ( <i>J</i> <sub>9b,8</sub> = 12.5 Hz, <i>J</i> <sub>9b,9a</sub> = 12.5 Hz, <i>J</i> <sub>9b,10</sub> = 11.0 Hz)                            | 17              | 10                         |
| 10  | 40.9       | 10-H                              | 125.3                               | 2.94 ( <i>J</i> <sub>10,5</sub> = 11.0 Hz, <i>J</i> <sub>10,9b</sub> = 11.0 Hz, <i>J</i> <sub>10,9a</sub> = 4.0 Hz)                             | 4b, 9ab, 12, 14 | 4 $\alpha$ , 8, 9 $\alpha$ |
| 11  | 132.1      |                                   |                                     |                                                                                                                                                 | 13              |                            |
| 12  | 111.9      | 12-H                              | 156.1                               | 6.82 ( <i>J</i> <sub>12,13</sub> = 7.0 Hz)                                                                                                      | 14              |                            |
| 13  | 122.1      | 13-H                              | 150.6                               | 7.04 ( <i>J</i> <sub>13,12</sub> = 7.0 Hz, <i>J</i> <sub>13,14</sub> = 8.0 Hz)                                                                  |                 |                            |
| 14  | 108.3      | 14-H                              | 161.5                               | 7.12 ( <i>J</i> <sub>14,13</sub> = 8.0 Hz)                                                                                                      | 12              |                            |
| 15  | 133.8      |                                   |                                     |                                                                                                                                                 | 2, 13           |                            |
| 16  | 126.2      |                                   |                                     |                                                                                                                                                 | 2, 4b, 12, 14   |                            |

|    |       |      |       |                                                                          |            |               |
|----|-------|------|-------|--------------------------------------------------------------------------|------------|---------------|
| 17 | 17.4  | 17-H | 126.1 | 1.15 ( $J_{17,8} = 7.0$ Hz)                                              | 9a         | 7, 9 $\alpha$ |
| 18 | 39.2  | 18-H | 136.0 | 2.69                                                                     |            |               |
| 1' | 170.1 |      |       |                                                                          | 3'         |               |
| 3' | 58.7  | 3'-H | 140.4 | 4.24 ( $J_{3',5'} = 5.5$ Hz)                                             | 5', 6', 7' |               |
| 4' | 175.0 |      |       |                                                                          | 3'         |               |
| 5' | 30.9  | 5'-H | 130.4 | 2.15 ( $J_{5',3'} = 5.5$ Hz, $J_{5',6'} = 7.0$ Hz, $J_{5',7'} = 7.0$ Hz) | 3', 6', 7' |               |
| 6' | 18.8  | 6'-H | 125.5 | 0.96 ( $J_{6',5'} = 7.0$ Hz)                                             | 3', 5', 7' |               |
| 7' | 17.2  | 7'-H | 125.6 | 0.95 ( $J_{7',5'} = 7.0$ Hz)                                             | 3', 5', 6' |               |

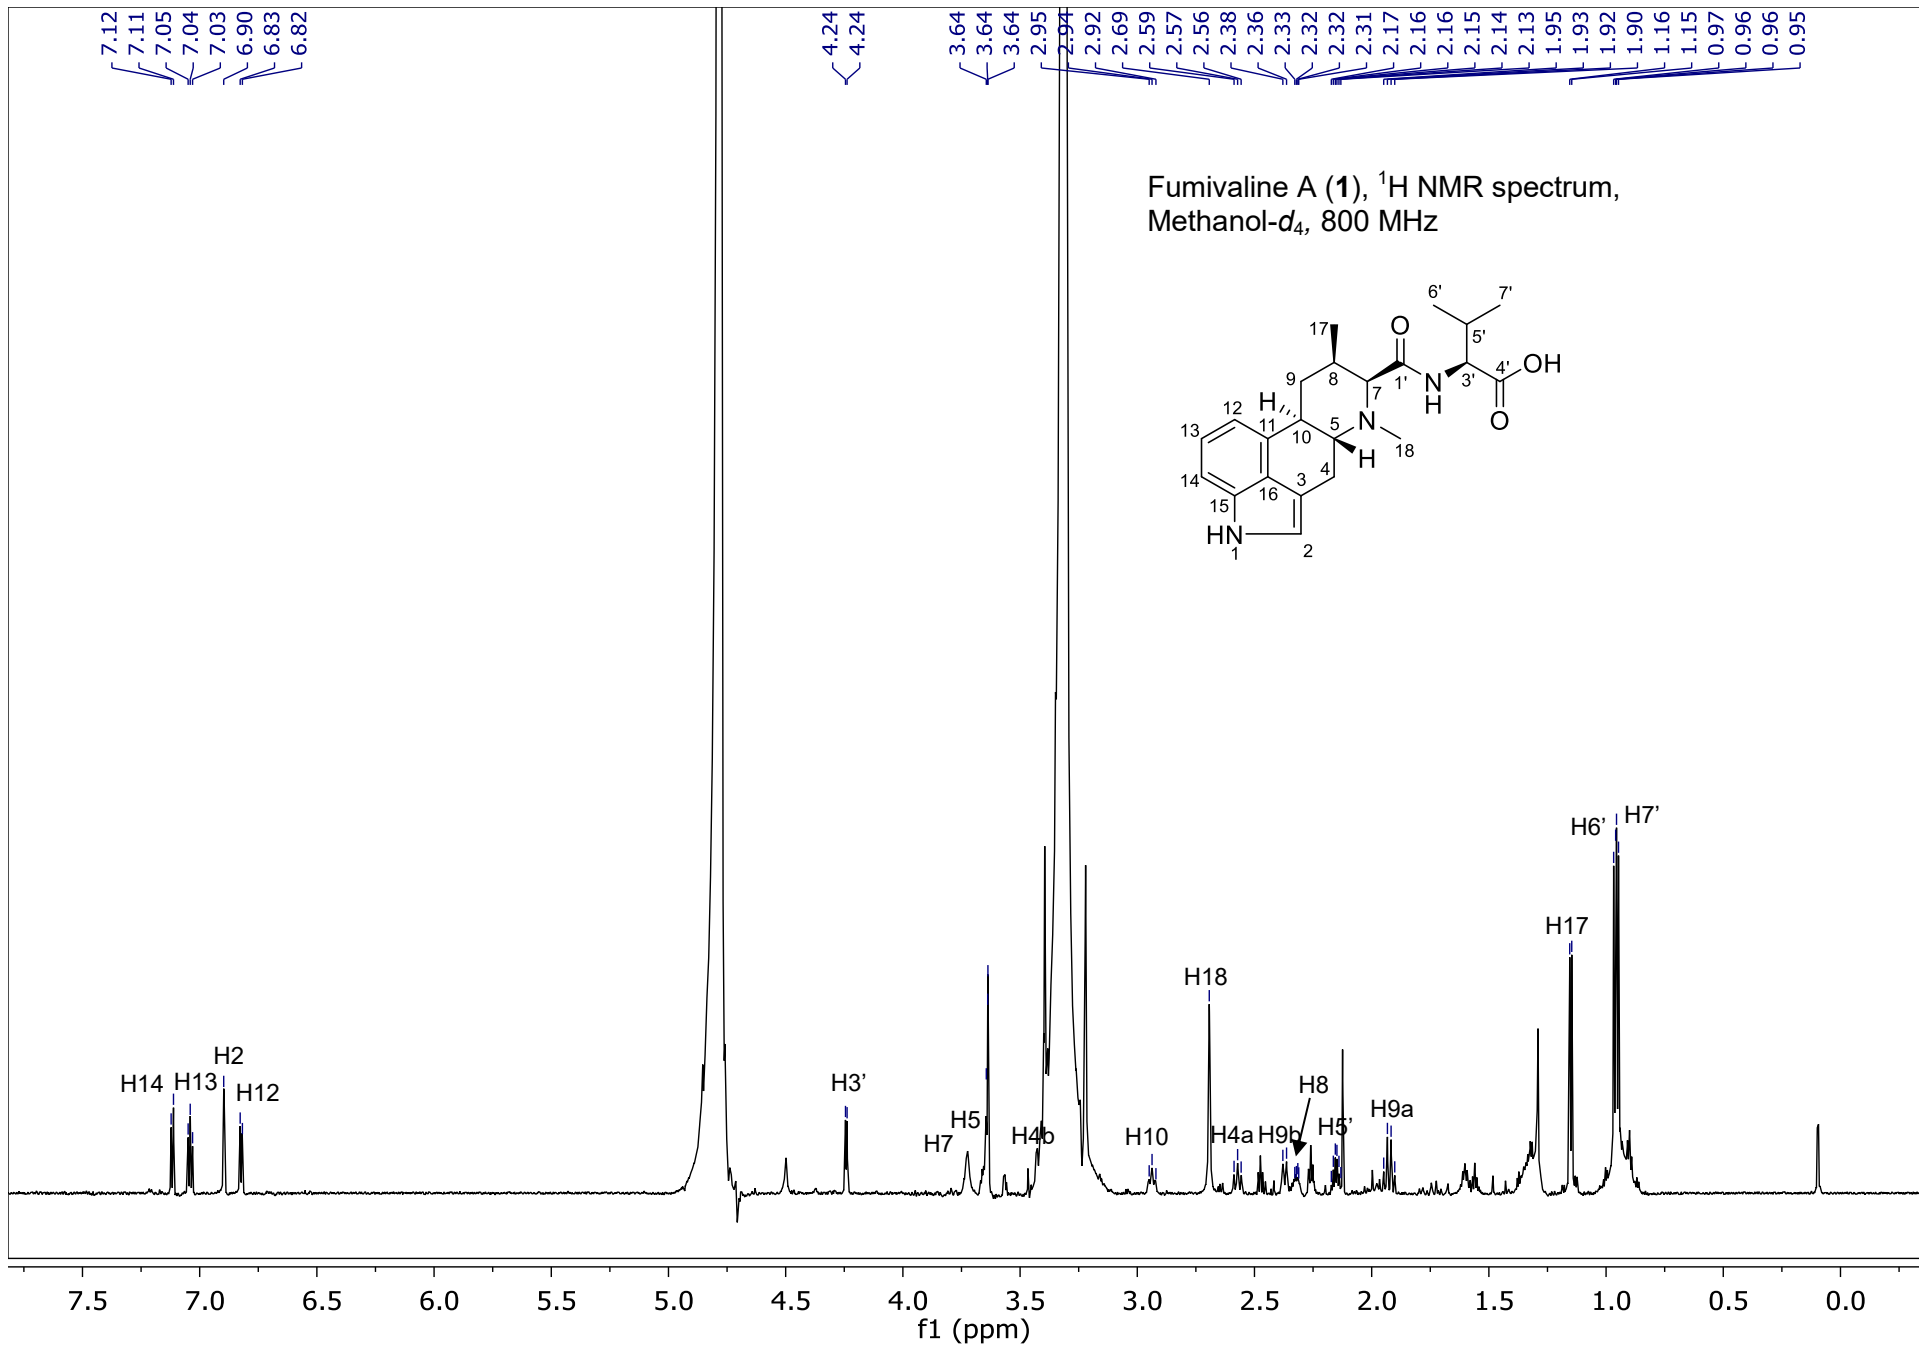

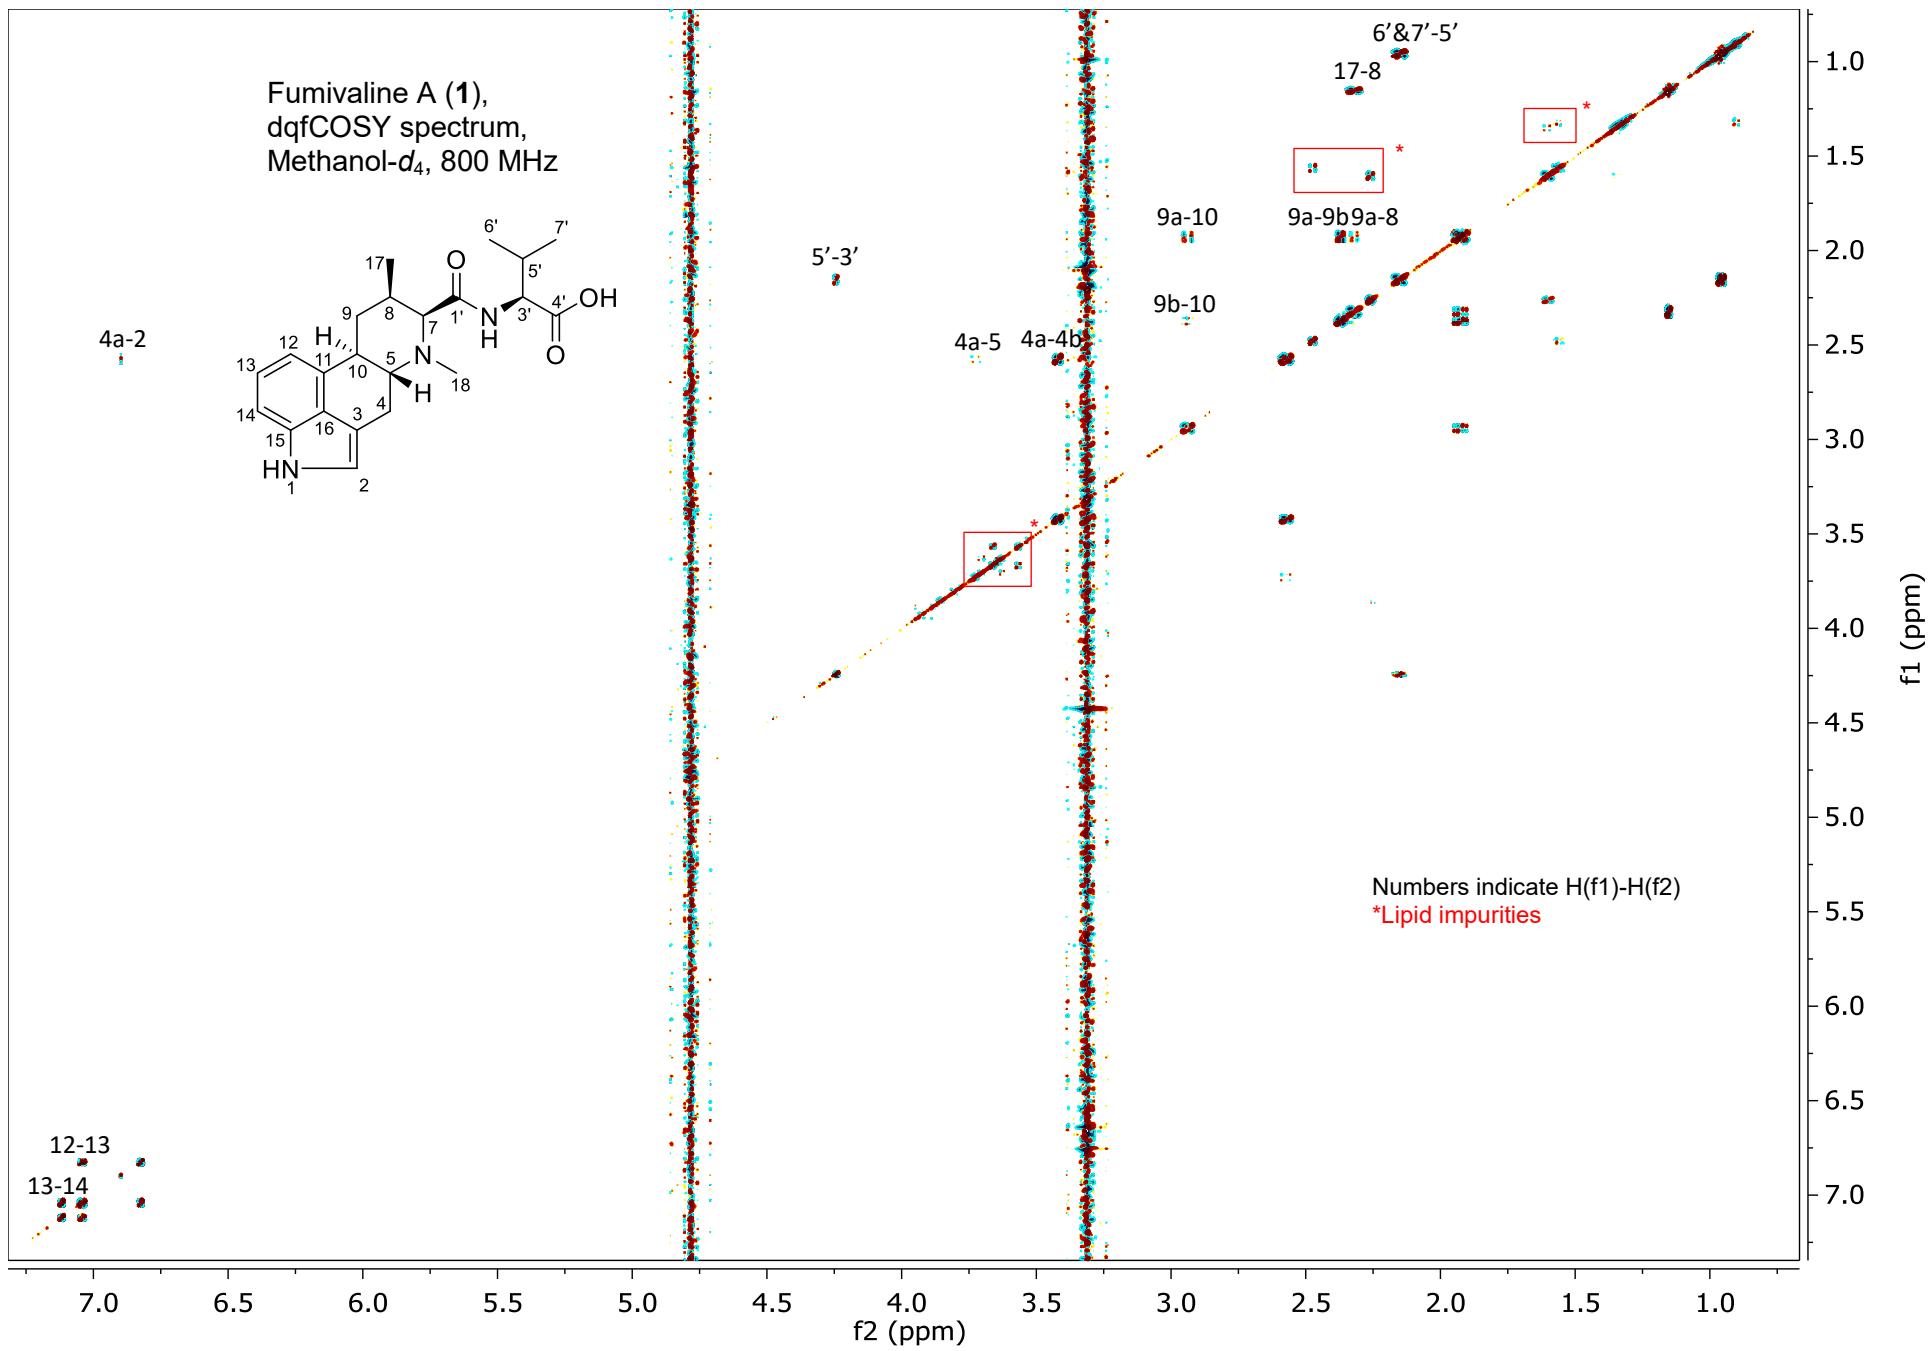

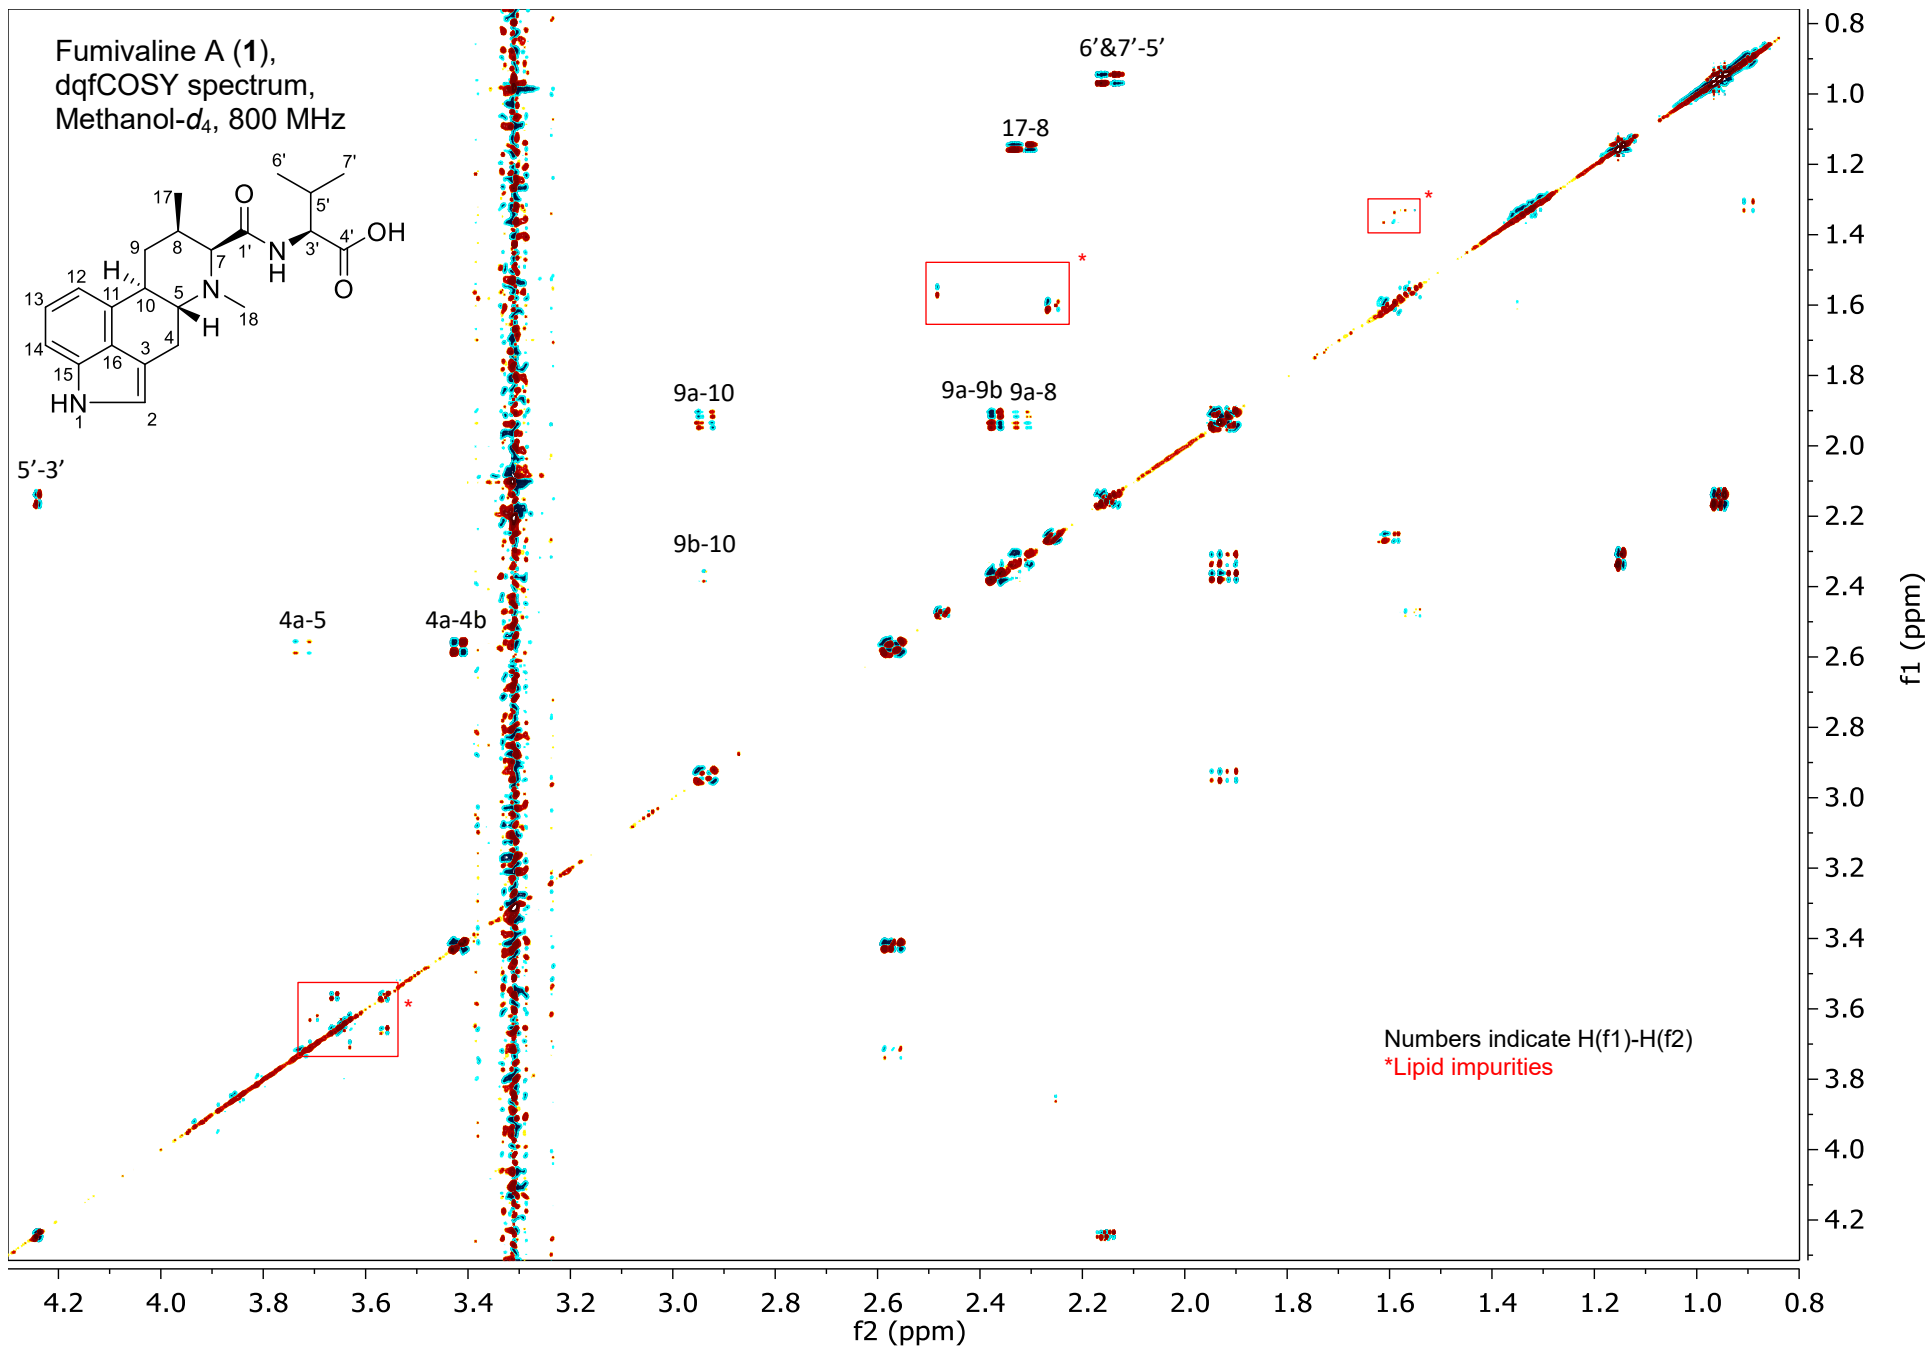



Fumivaline A (1), coupled HSQC spectrum,  
Methanol-*d*<sub>4</sub>, 800 MHz

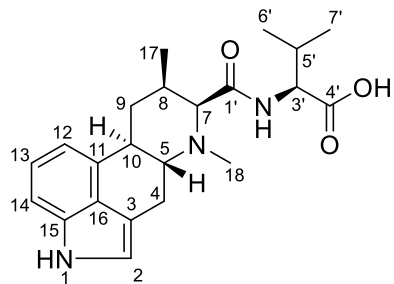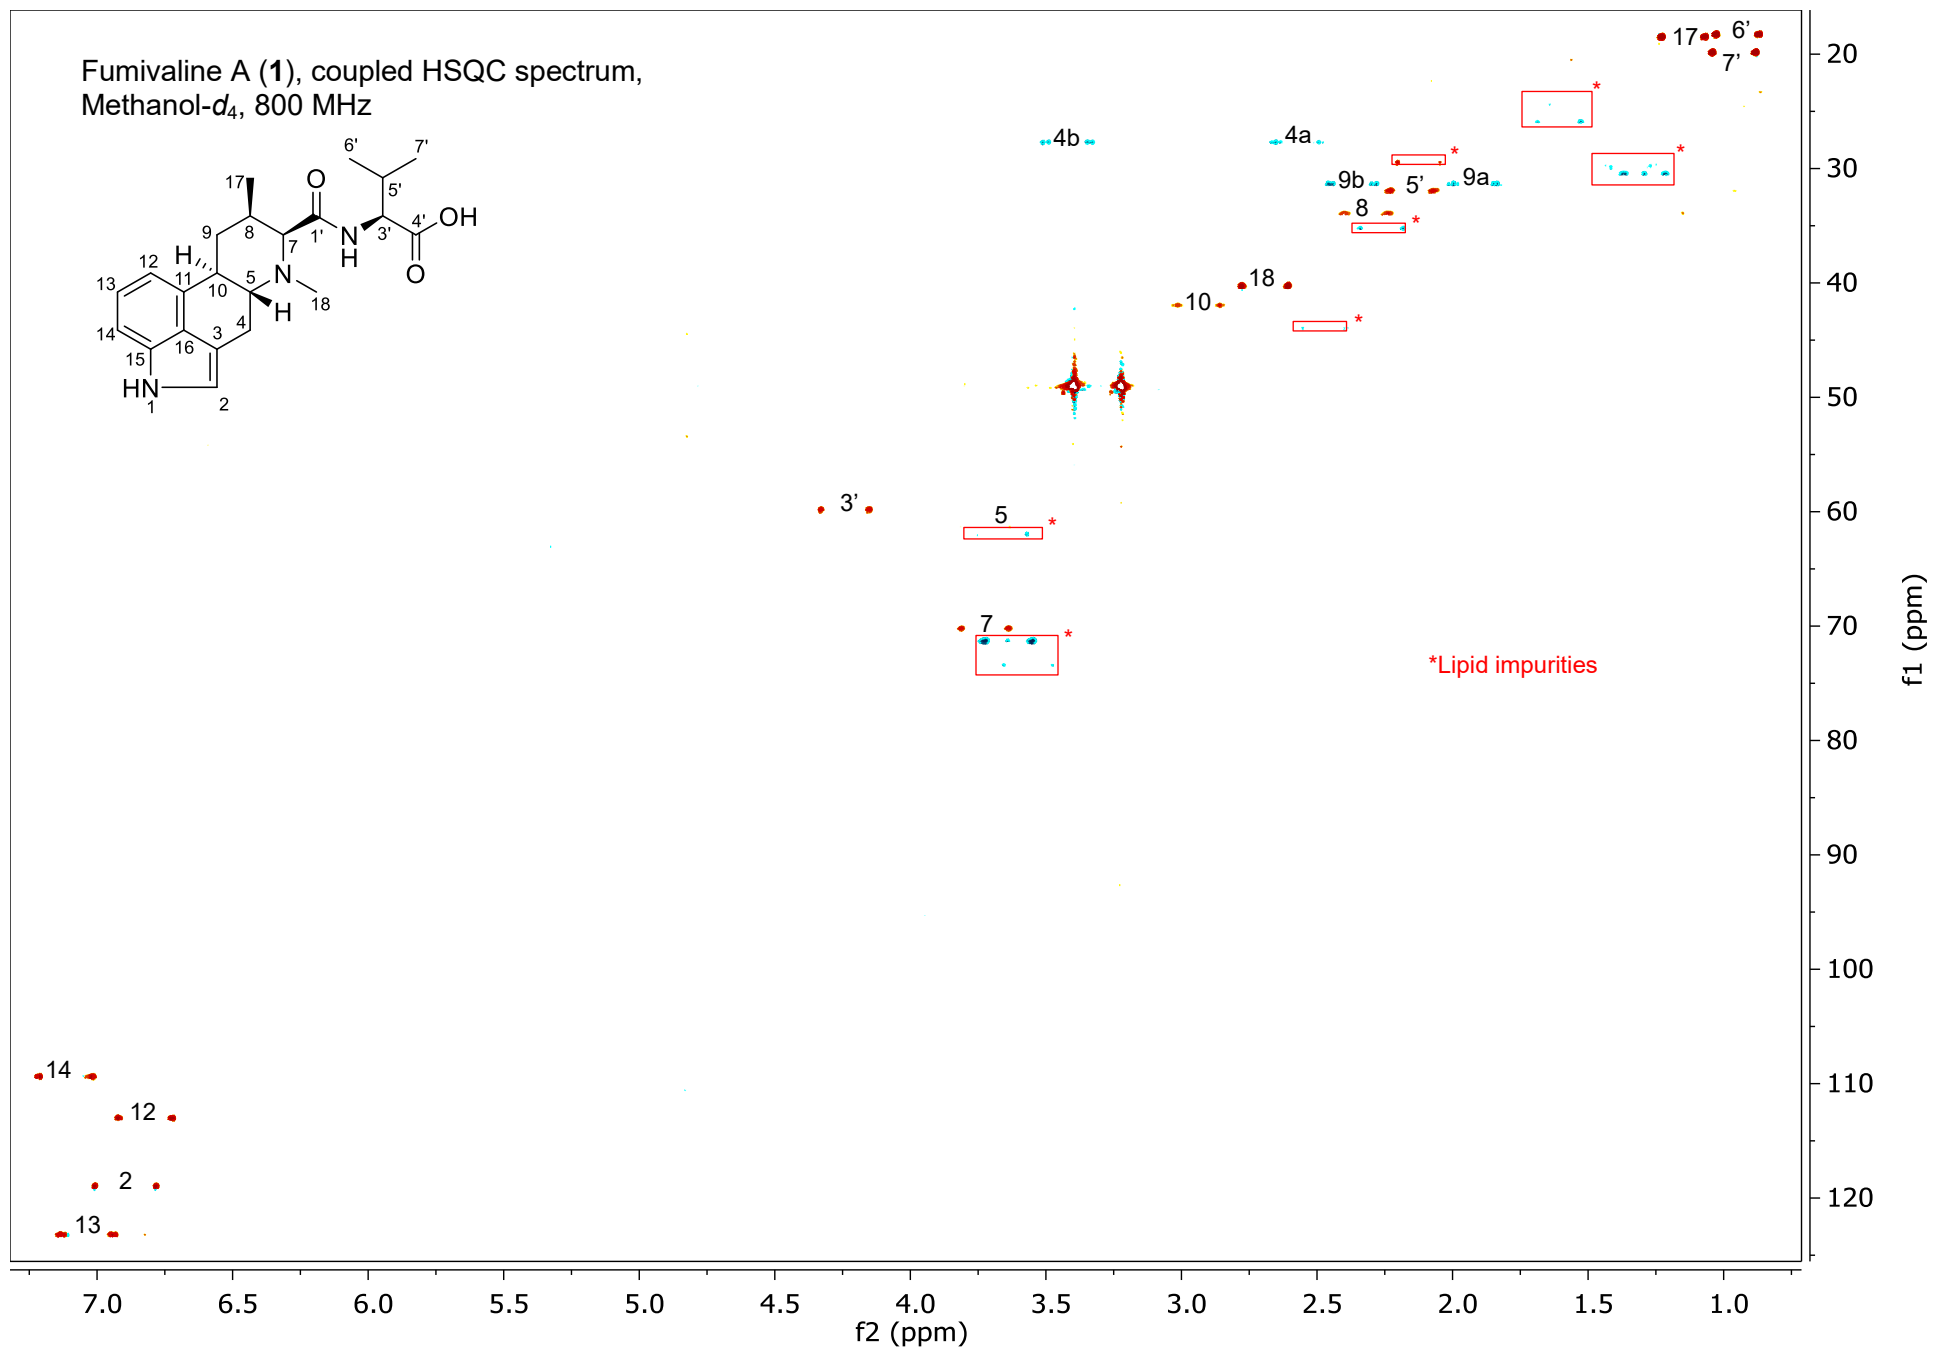

Fumivaline A (1), coupled HSQC spectrum,  
Methanol- $d_4$ , 800 MHz

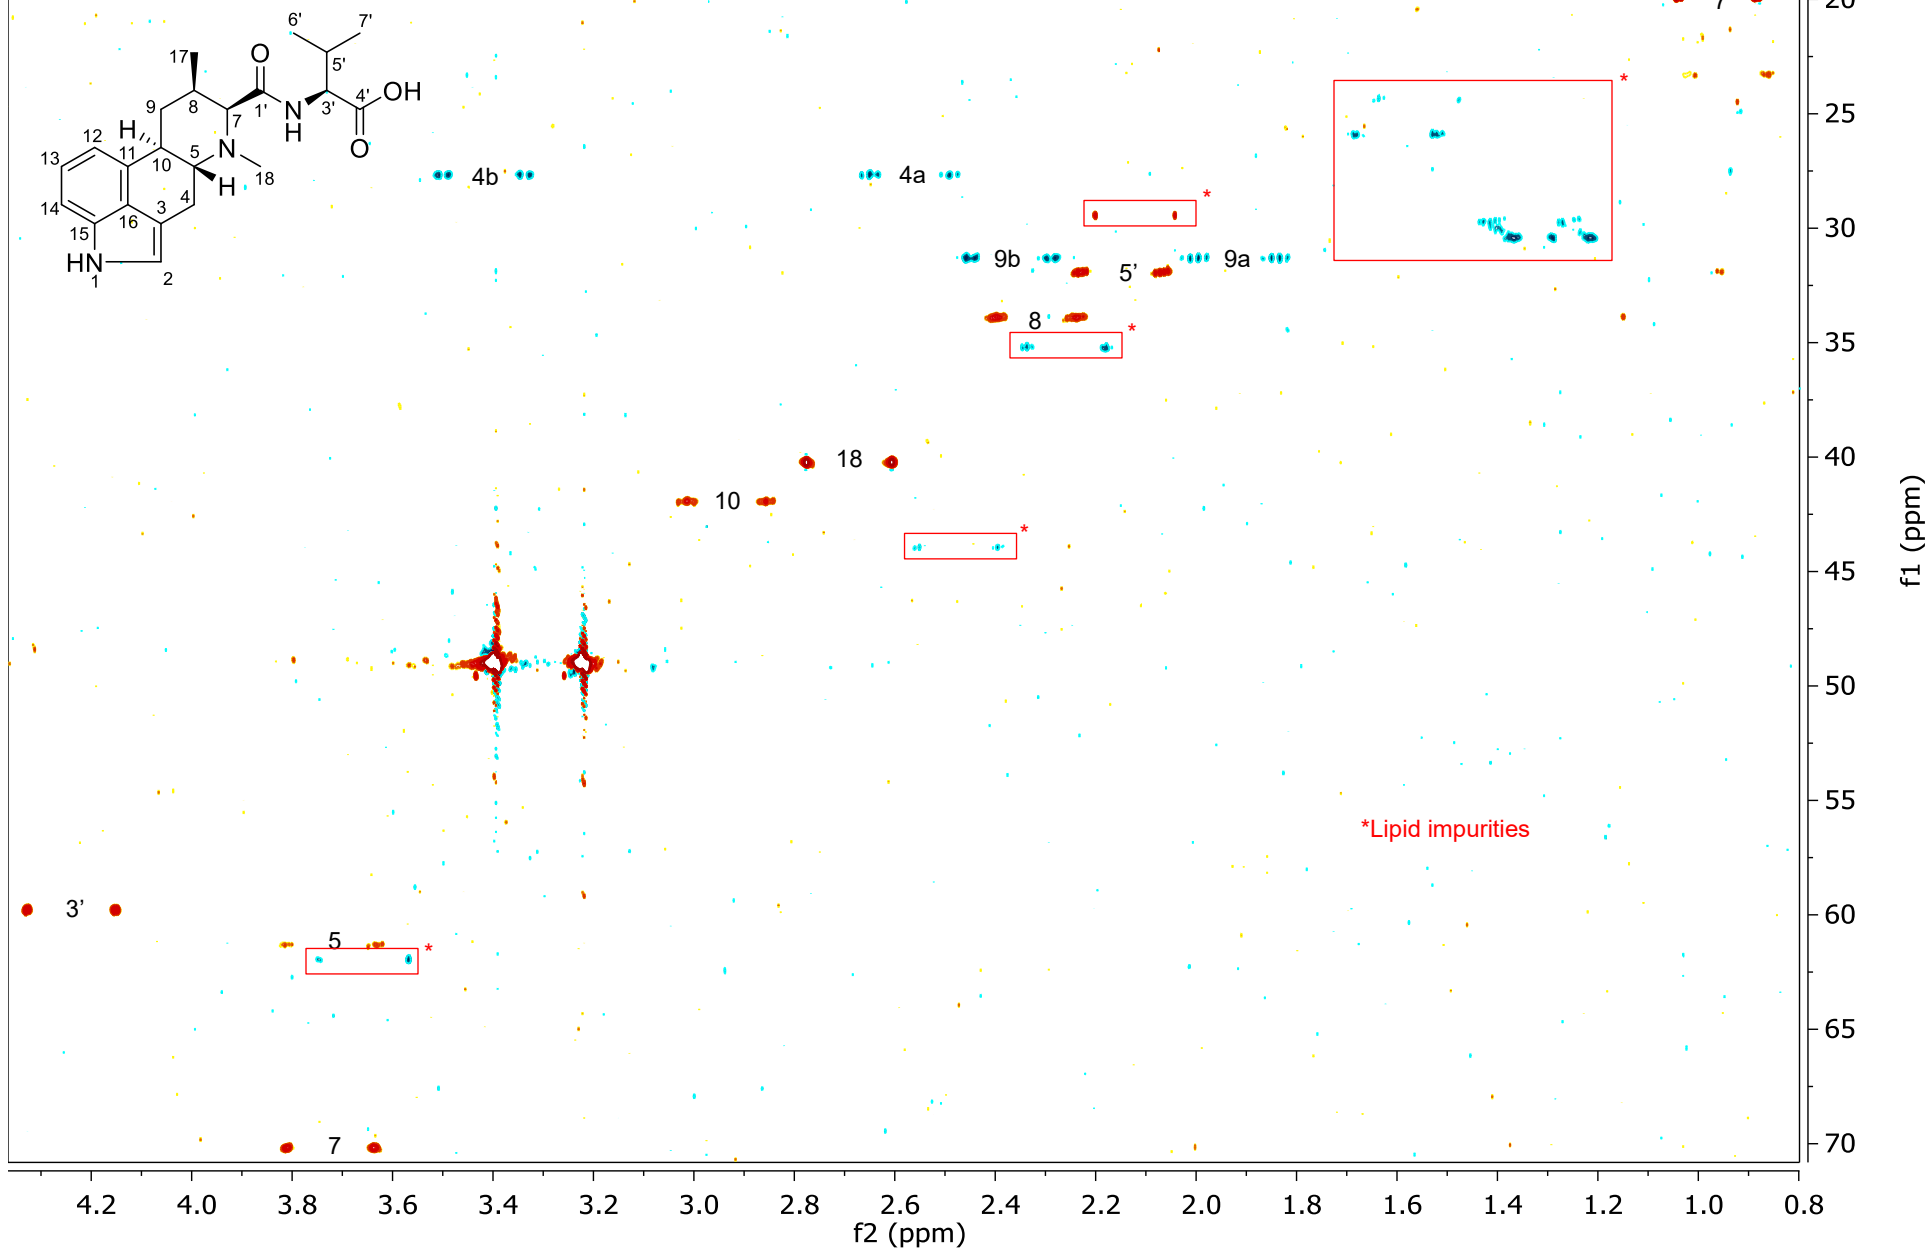

Fumivaline A (1), HMBC spectrum,  
Methanol-d<sub>4</sub>, 800 MHz

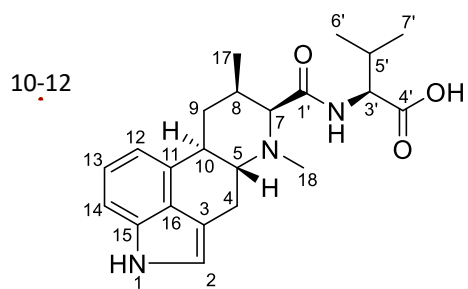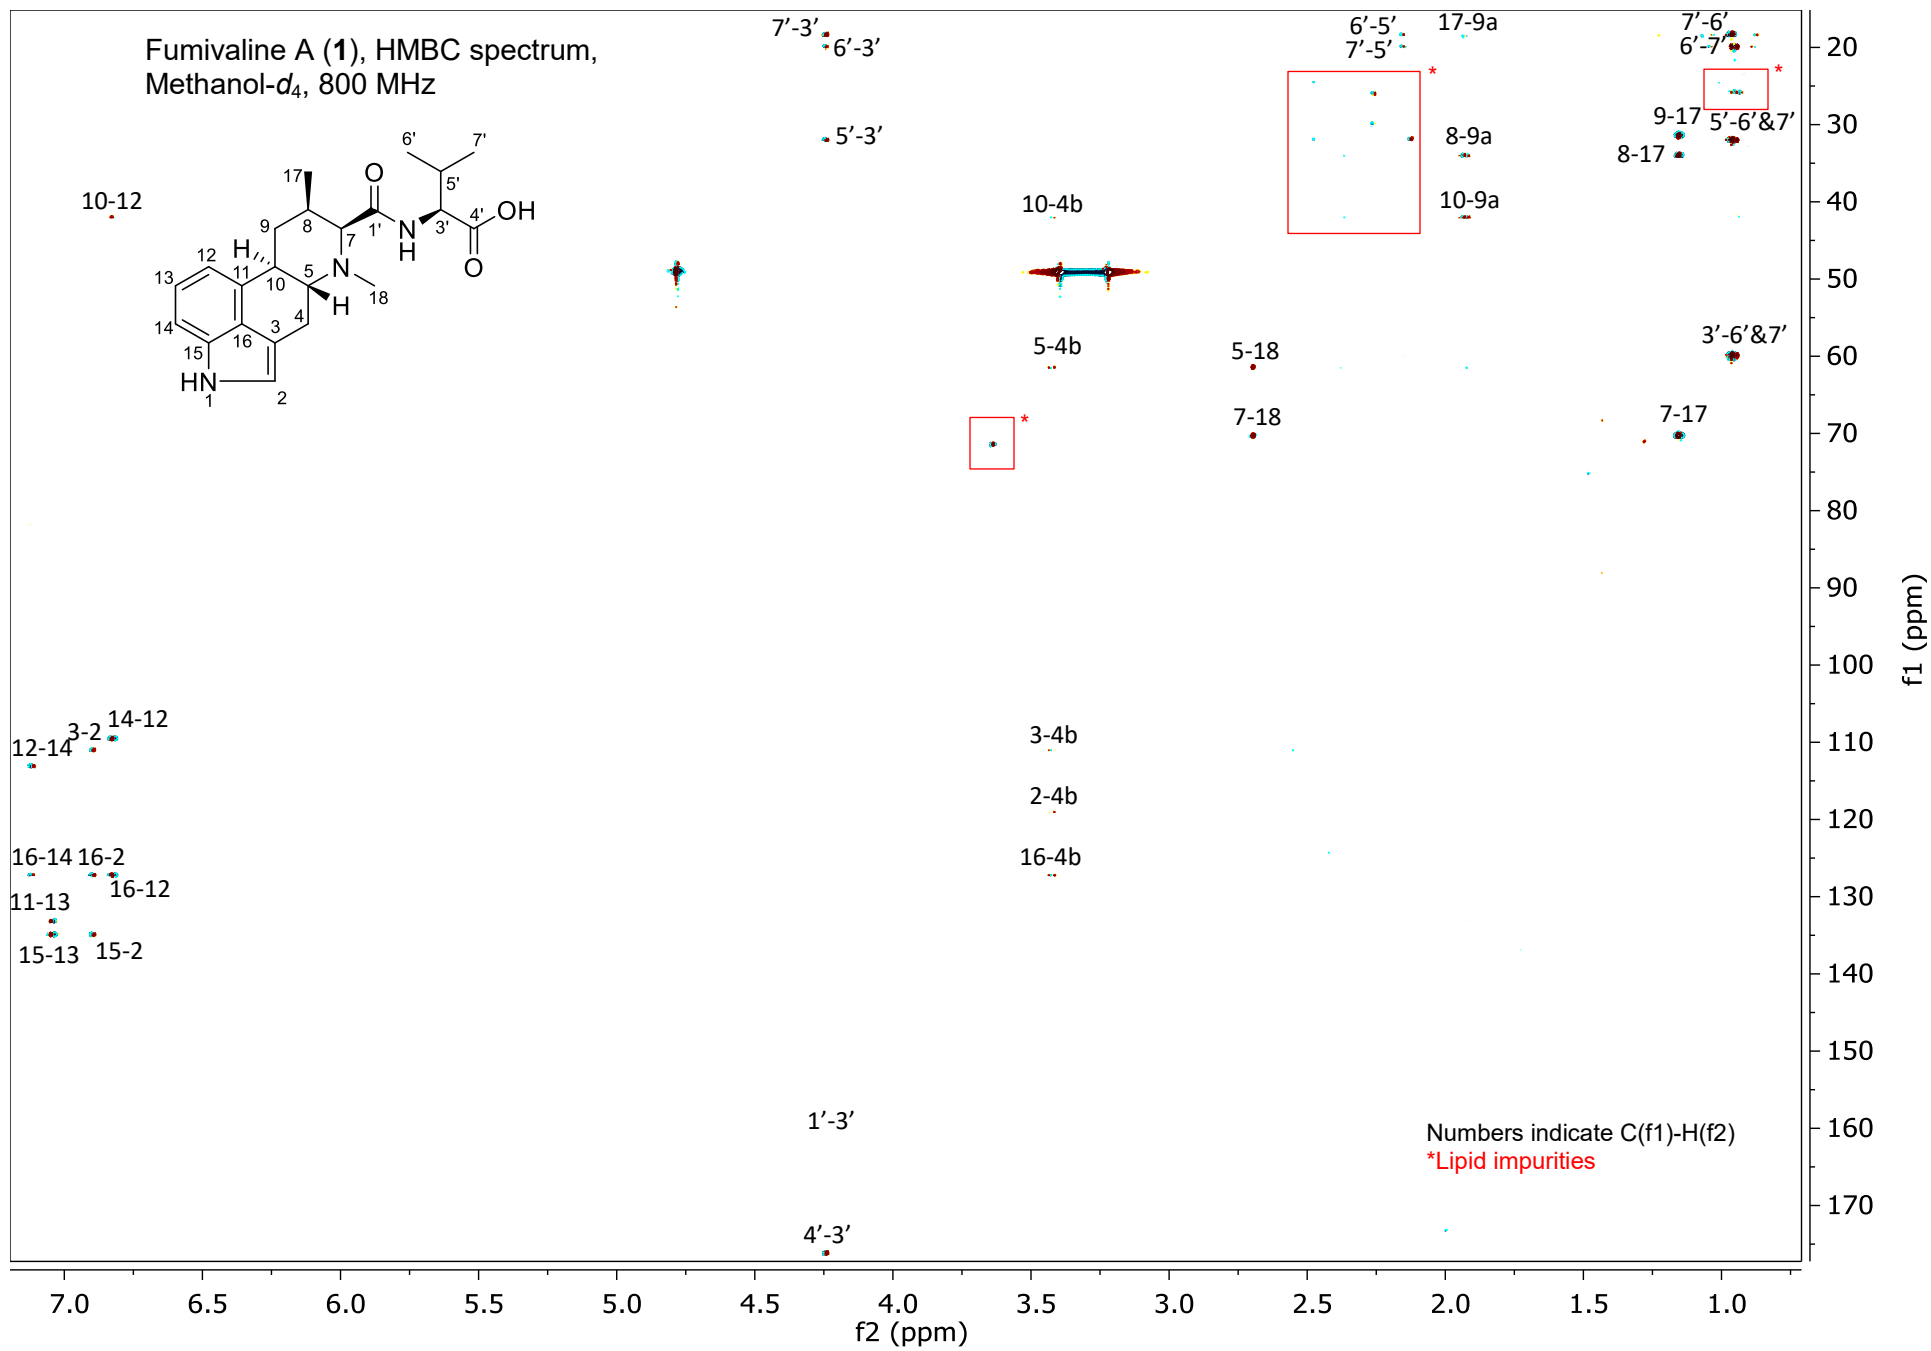

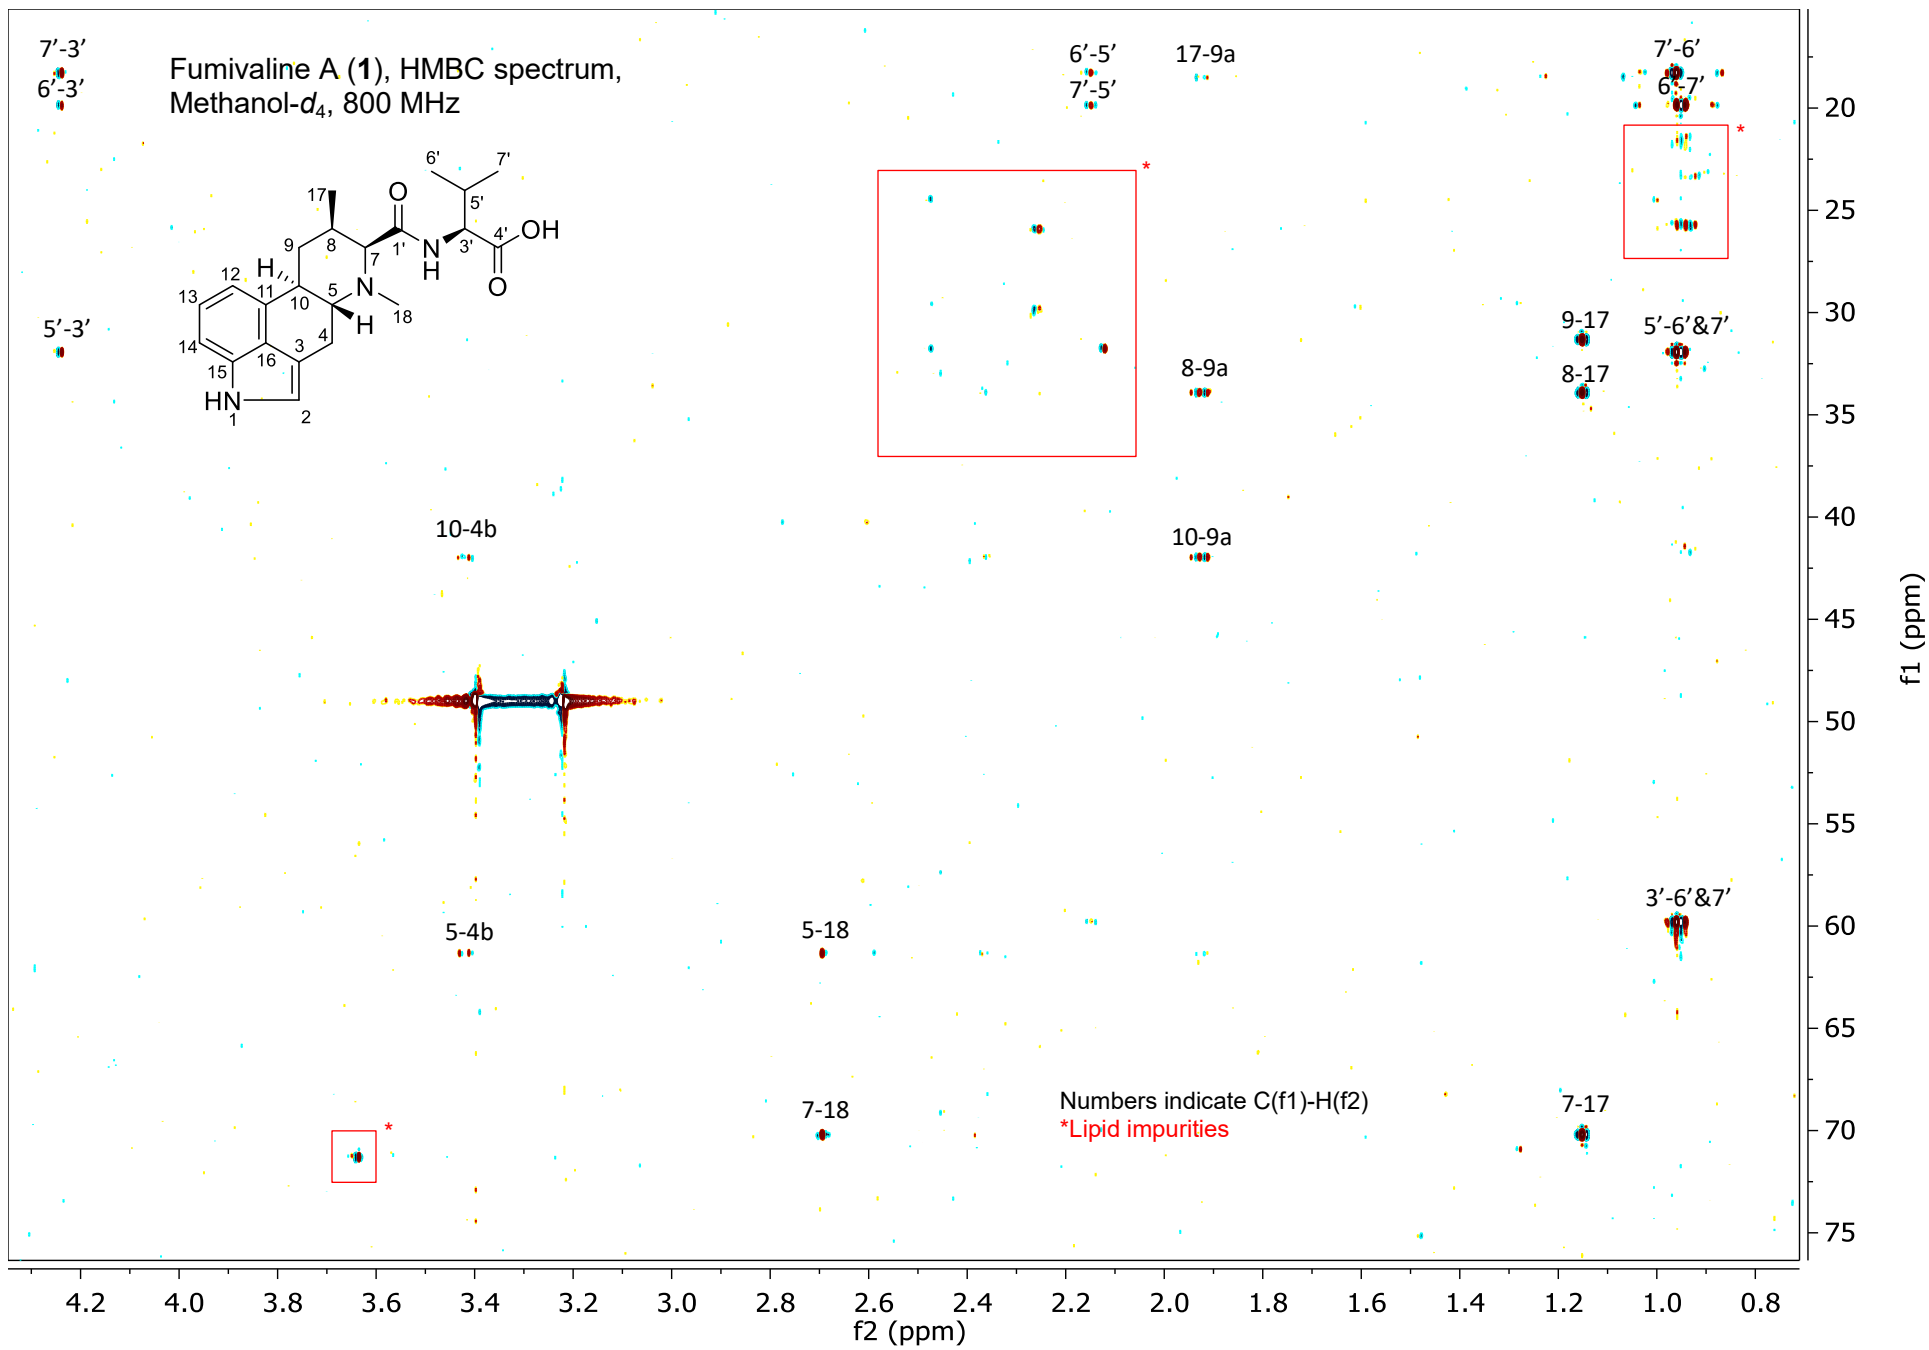

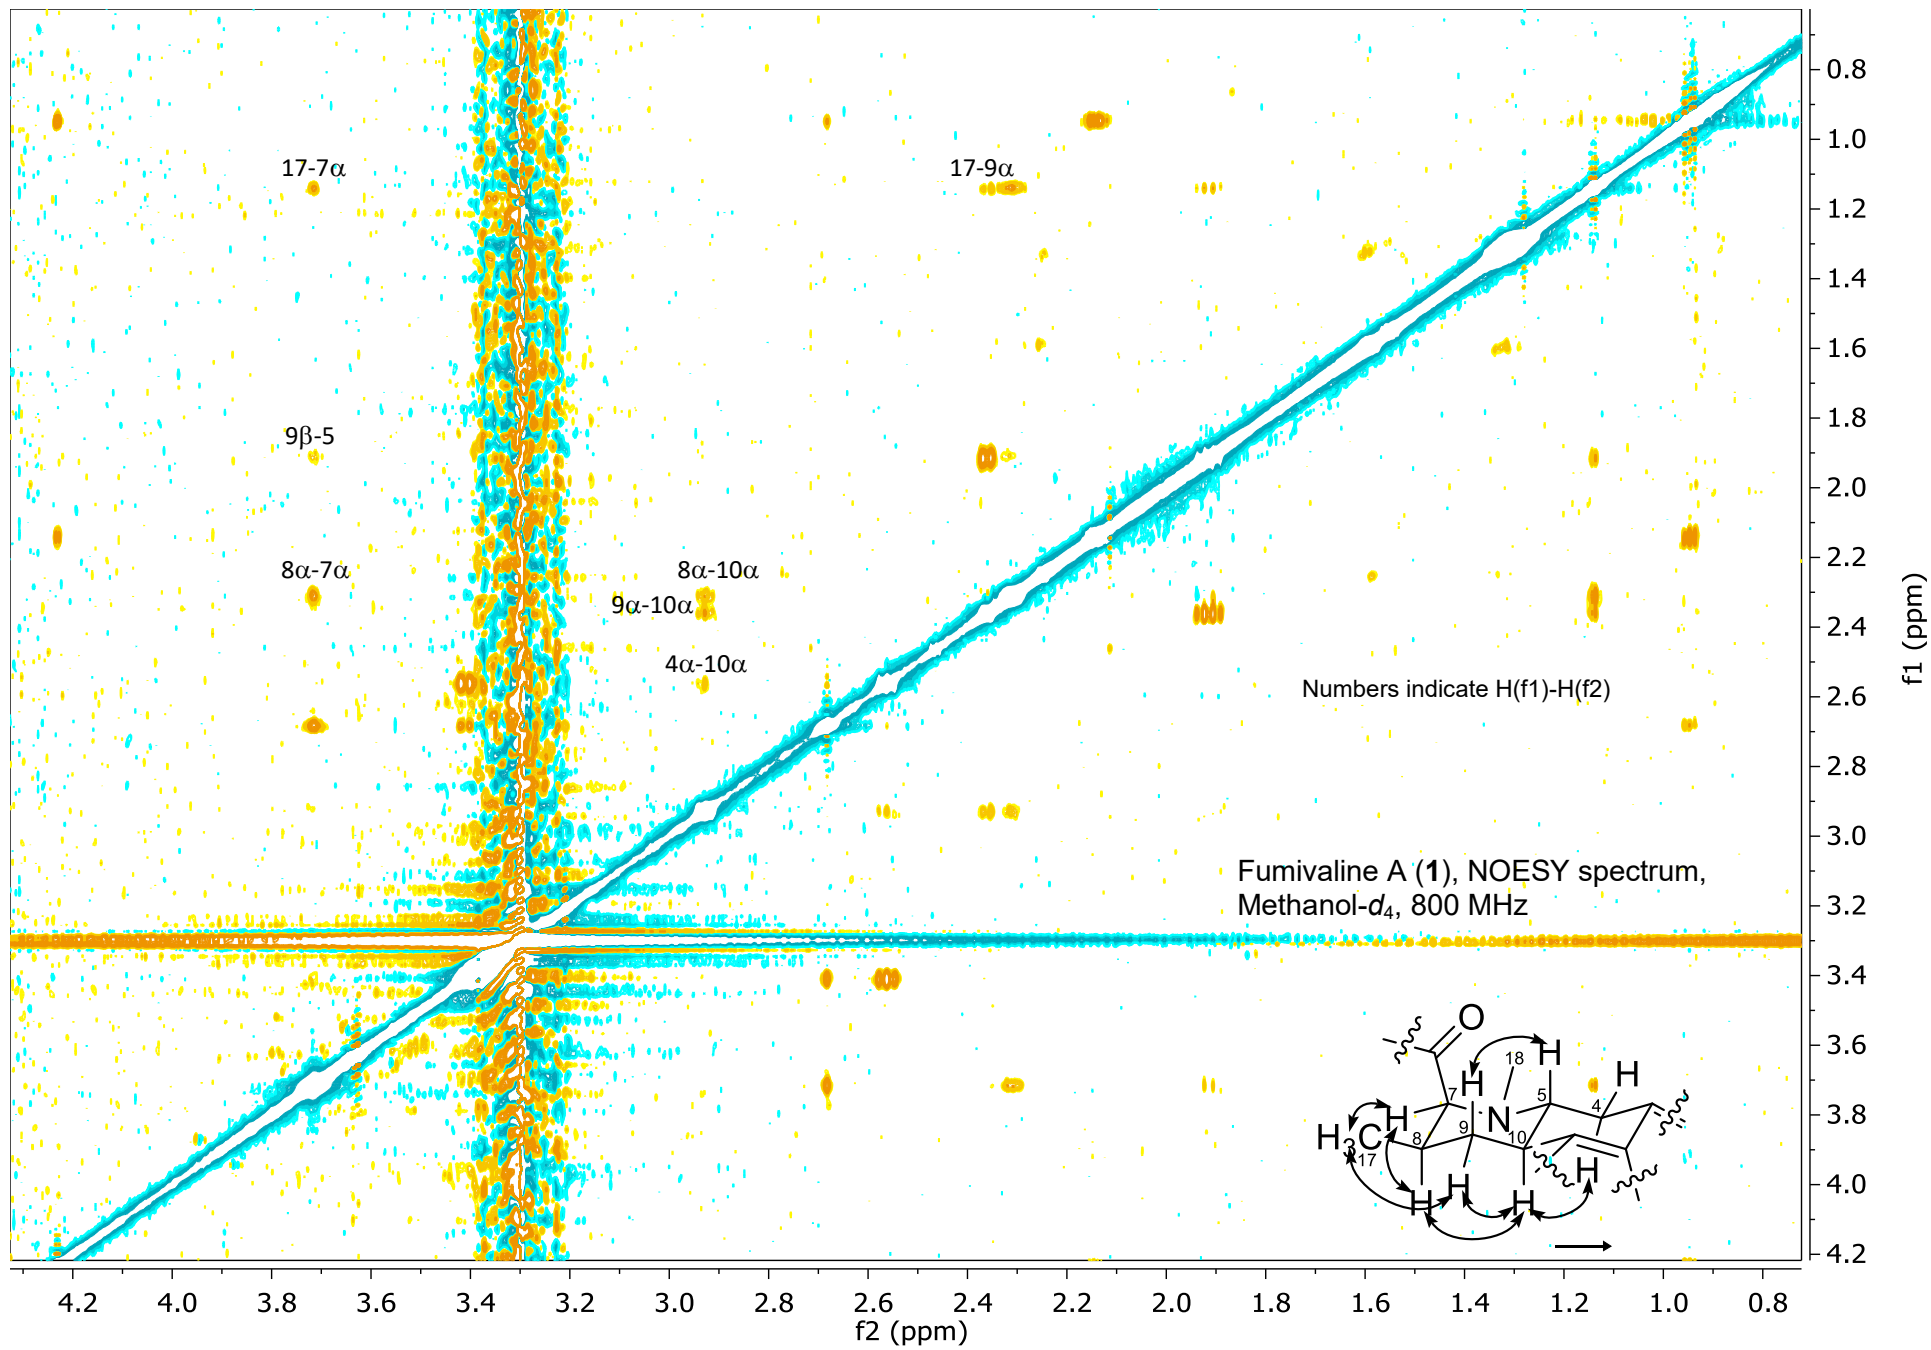

**<sup>1</sup>H (600 MHz) and <sup>13</sup>C (151 MHz) NMR spectroscopic data for fumicicolin A (3) in methanol-*d*<sub>4</sub>**

Chemical shifts were referenced to  $\delta(\text{CHD}_2\text{OD}) = 3.31$  and  $\delta(^{13}\text{C}\text{HD}_2\text{OD}) = 49.0$ . (<sup>1</sup>H,<sup>1</sup>H)-*J*-coupling constants were determined from the <sup>1</sup>H or dqfCOSY spectra. HMBC correlations are from the proton(s) stated to the indicated <sup>13</sup>C atom.

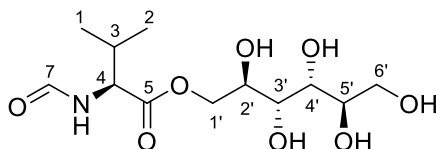

| No. | $\delta_c$ | Proton | $\delta_H$ ( $J_{HH}$ [Hz])                                                                                                          | HMBC        |
|-----|------------|--------|--------------------------------------------------------------------------------------------------------------------------------------|-------------|
| 1   | 18.0       | 1-H    | 0.96 ( $J_{1,3} = 6.8$ Hz)                                                                                                           | 2, 3, 4     |
| 2   | 19.5       | 2-H    | 0.99 ( $J_{2,3} = 6.8$ Hz)                                                                                                           | 1, 3, 4     |
| 3   | 31.9       | 3-H    | 2.25 ( $J_{3,1} = 6.8$ Hz, $J_{3,2} = 6.8$ Hz, $J_{3,4} = 5.5$ Hz)                                                                   | 1, 2, 4     |
| 4   | 57.7       | 4-H    | 4.51 ( $J_{4,3} = 5.7$ Hz)                                                                                                           | 1, 2, 3, 7  |
| 5   | 172.7      |        |                                                                                                                                      | 4, 1'       |
| 7   | 163.8      | 7-H    | 8.14 (s)                                                                                                                             | 4           |
| 1'  | 68.6       | 1'-Ha  | 4.45 ( $J_{1'a,1'b} = 11.5$ Hz, $J_{1'a,2'} = 3.5$ Hz)-rotamer 1<br>4.43 ( $J_{1'a,1'b} = 11.5$ Hz, $J_{1'a,2'} = 3.5$ Hz)-rotamer 2 | 3'          |
|     |            | 1'-Hb  | 4.25 ( $J_{1'b,1'a} = 11.5$ Hz, $J_{1'b,2'} = 6.5$ Hz)-rotamer 1<br>4.22 ( $J_{1'b,1'a} = 11.5$ Hz, $J_{1'b,2'} = 6.5$ Hz)-rotamer 2 |             |
| 2'  | 70.3       | 2'-H   | 3.90 ( $J_{2',1'a} = 3.5$ Hz, $J_{2',1'b} = 6.5$ Hz, $J_{2',3'} = 8.5$ Hz)                                                           | 1b', 3', 4' |
| 3'  | 71.0       | 3'-H   | 3.79 (m)                                                                                                                             | 1a', 2'     |
| 4'  | 70.9       | 4'-H   | 3.79 (m)                                                                                                                             | 5', 6'      |
| 5'  | 72.9       | 5'-H   | 3.69 ( $J_{5',4'} = 8.5$ Hz, $J_{5',6'a} = 4.0$ Hz, $J_{5',6'b} = 6.5$ Hz)                                                           | 3', 4', 6'  |
| 6'  | 65.1       | 6'-Ha  | 3.81 ( $J_{6'a,6'b} = 11.5$ Hz, $J_{6'a,5'} = 4.0$ Hz)                                                                               | 4', 5'      |
|     |            | 6'-Hb  | 3.64 ( $J_{6'b,6'a} = 11.5$ Hz, $J_{6,b} = 6.5$ Hz)                                                                                  |             |

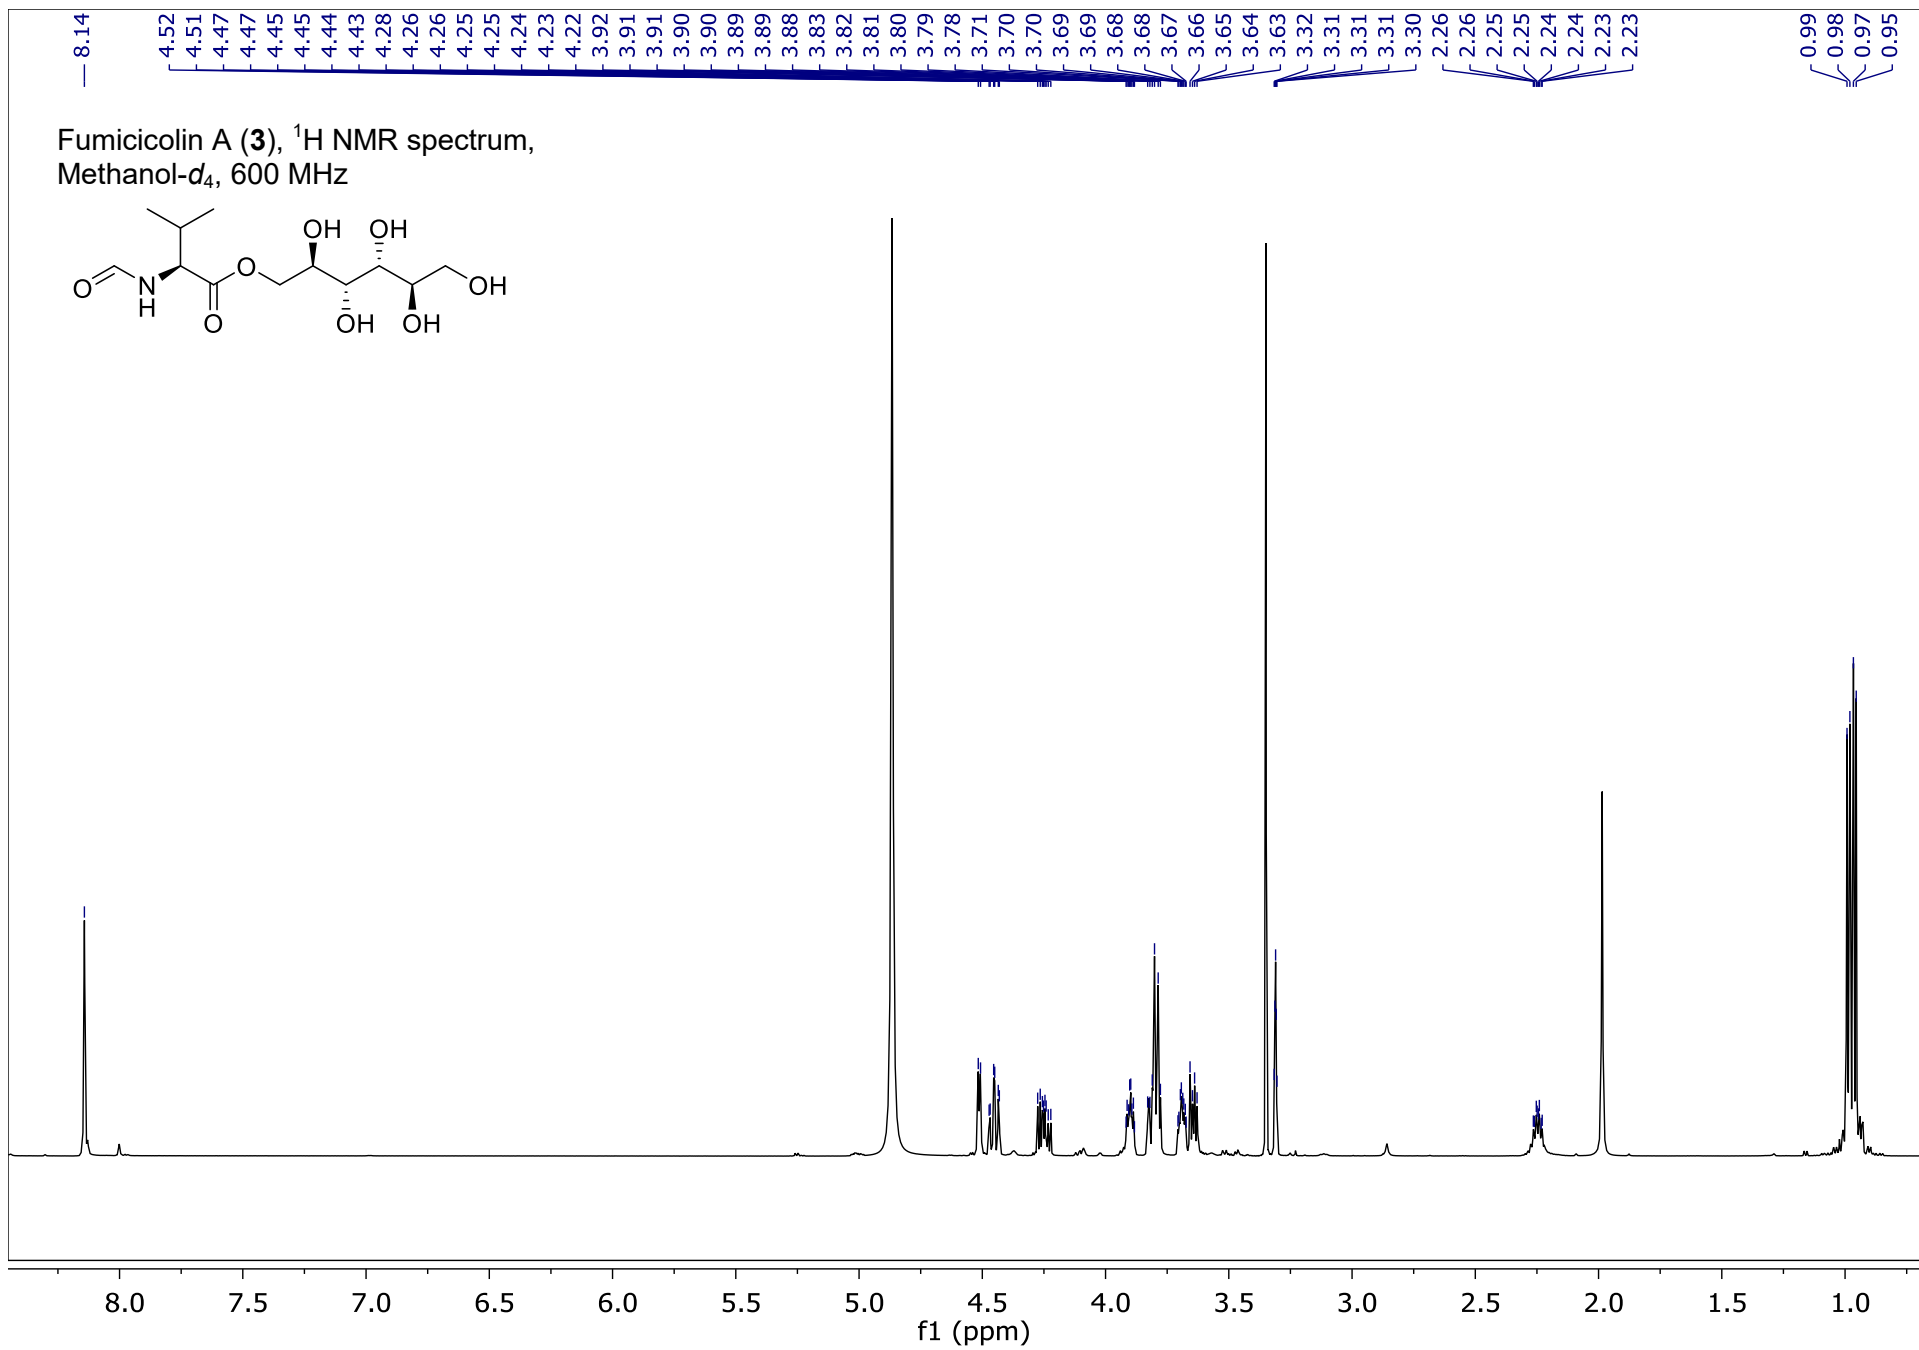



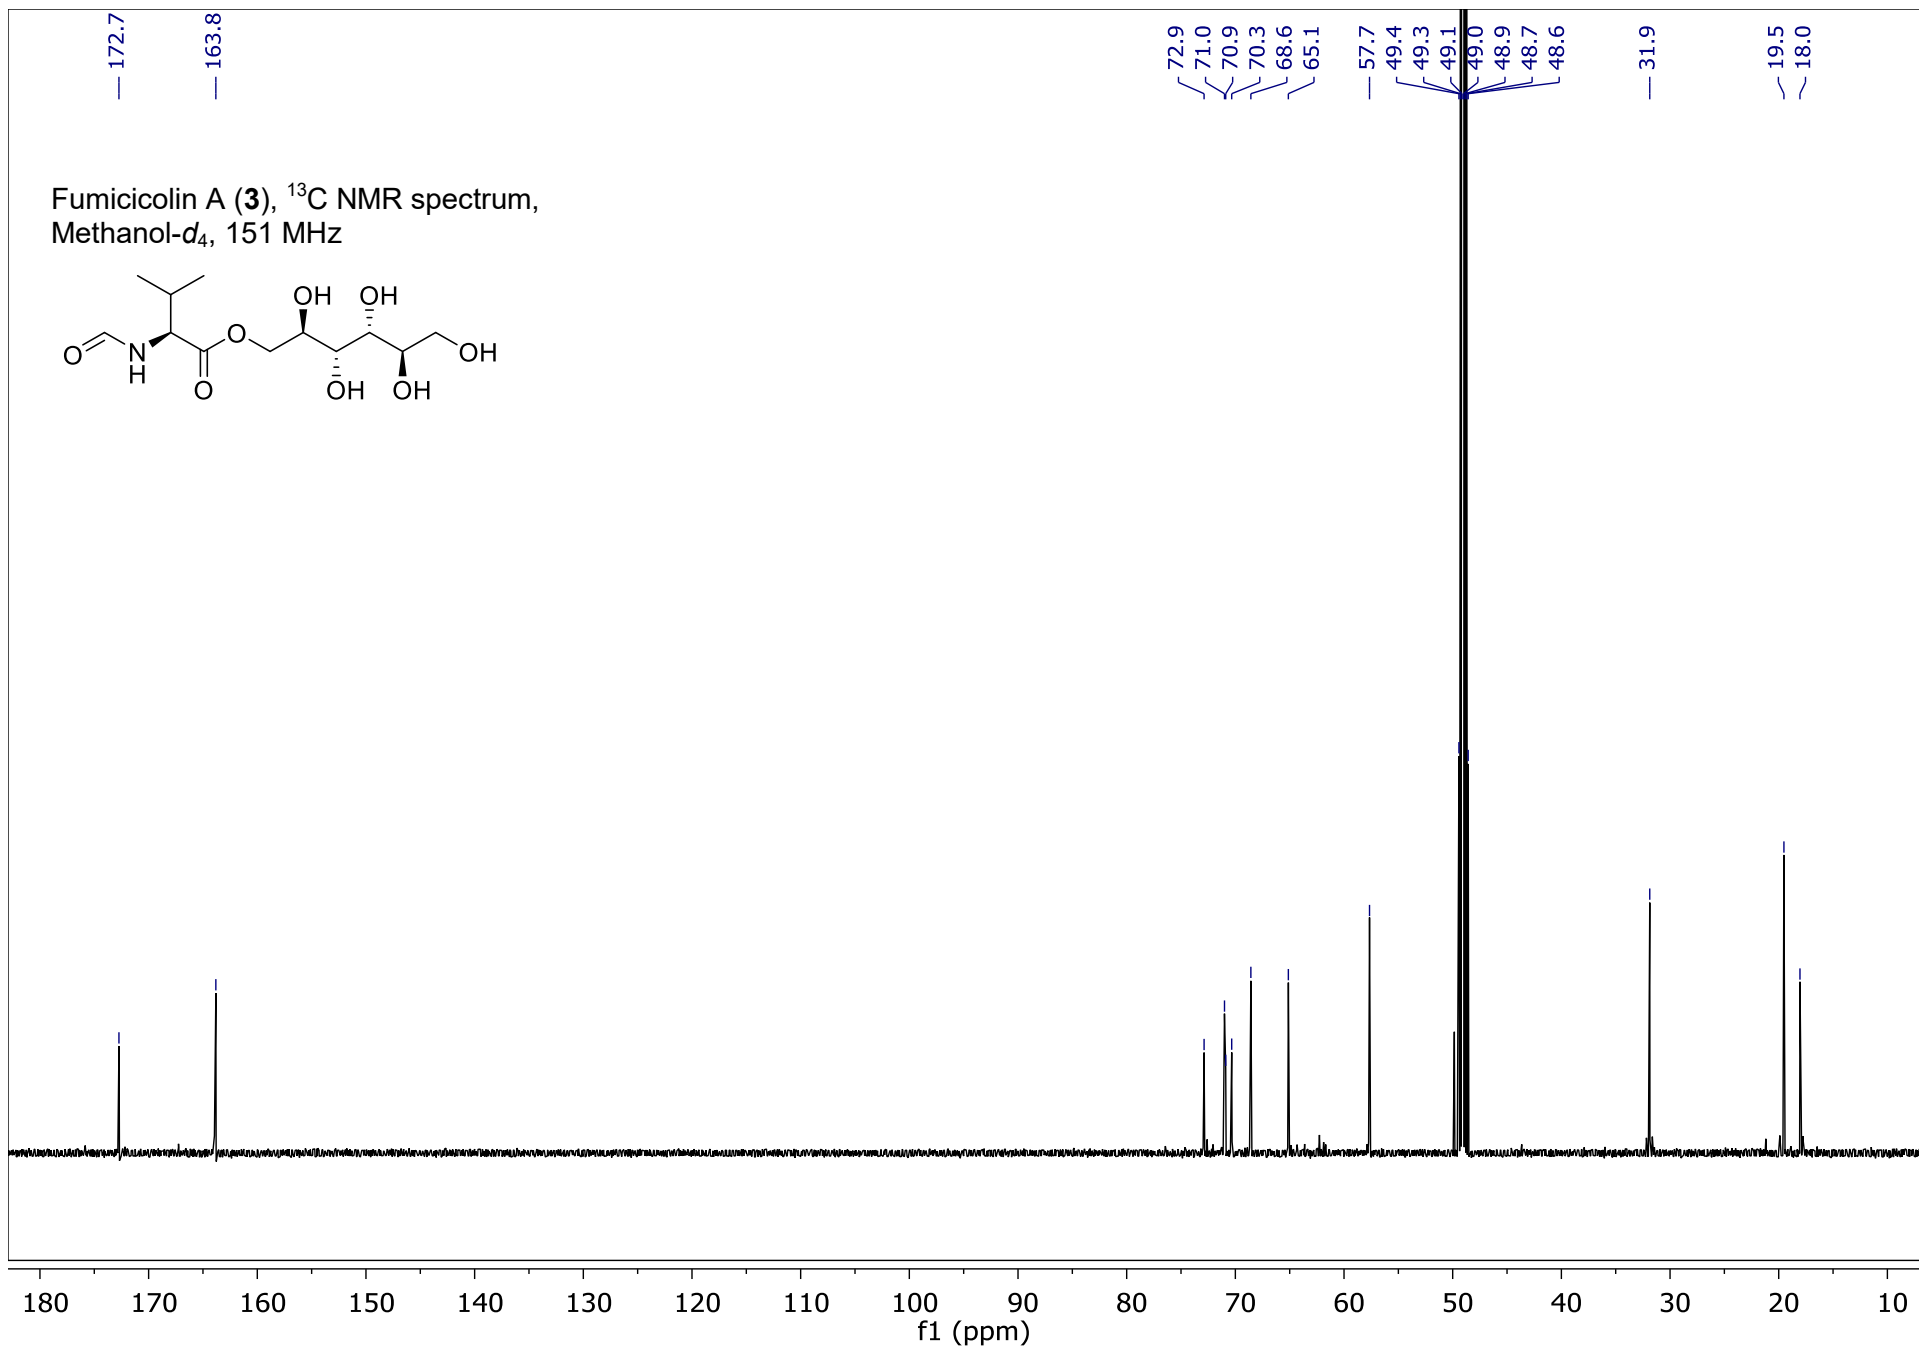

Fumicolin A (**3**), dqfCOSY spectrum,  
Methanol-*d*<sub>4</sub>, 600 MHz

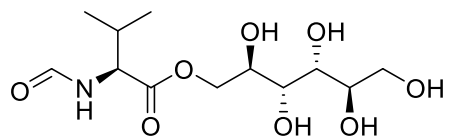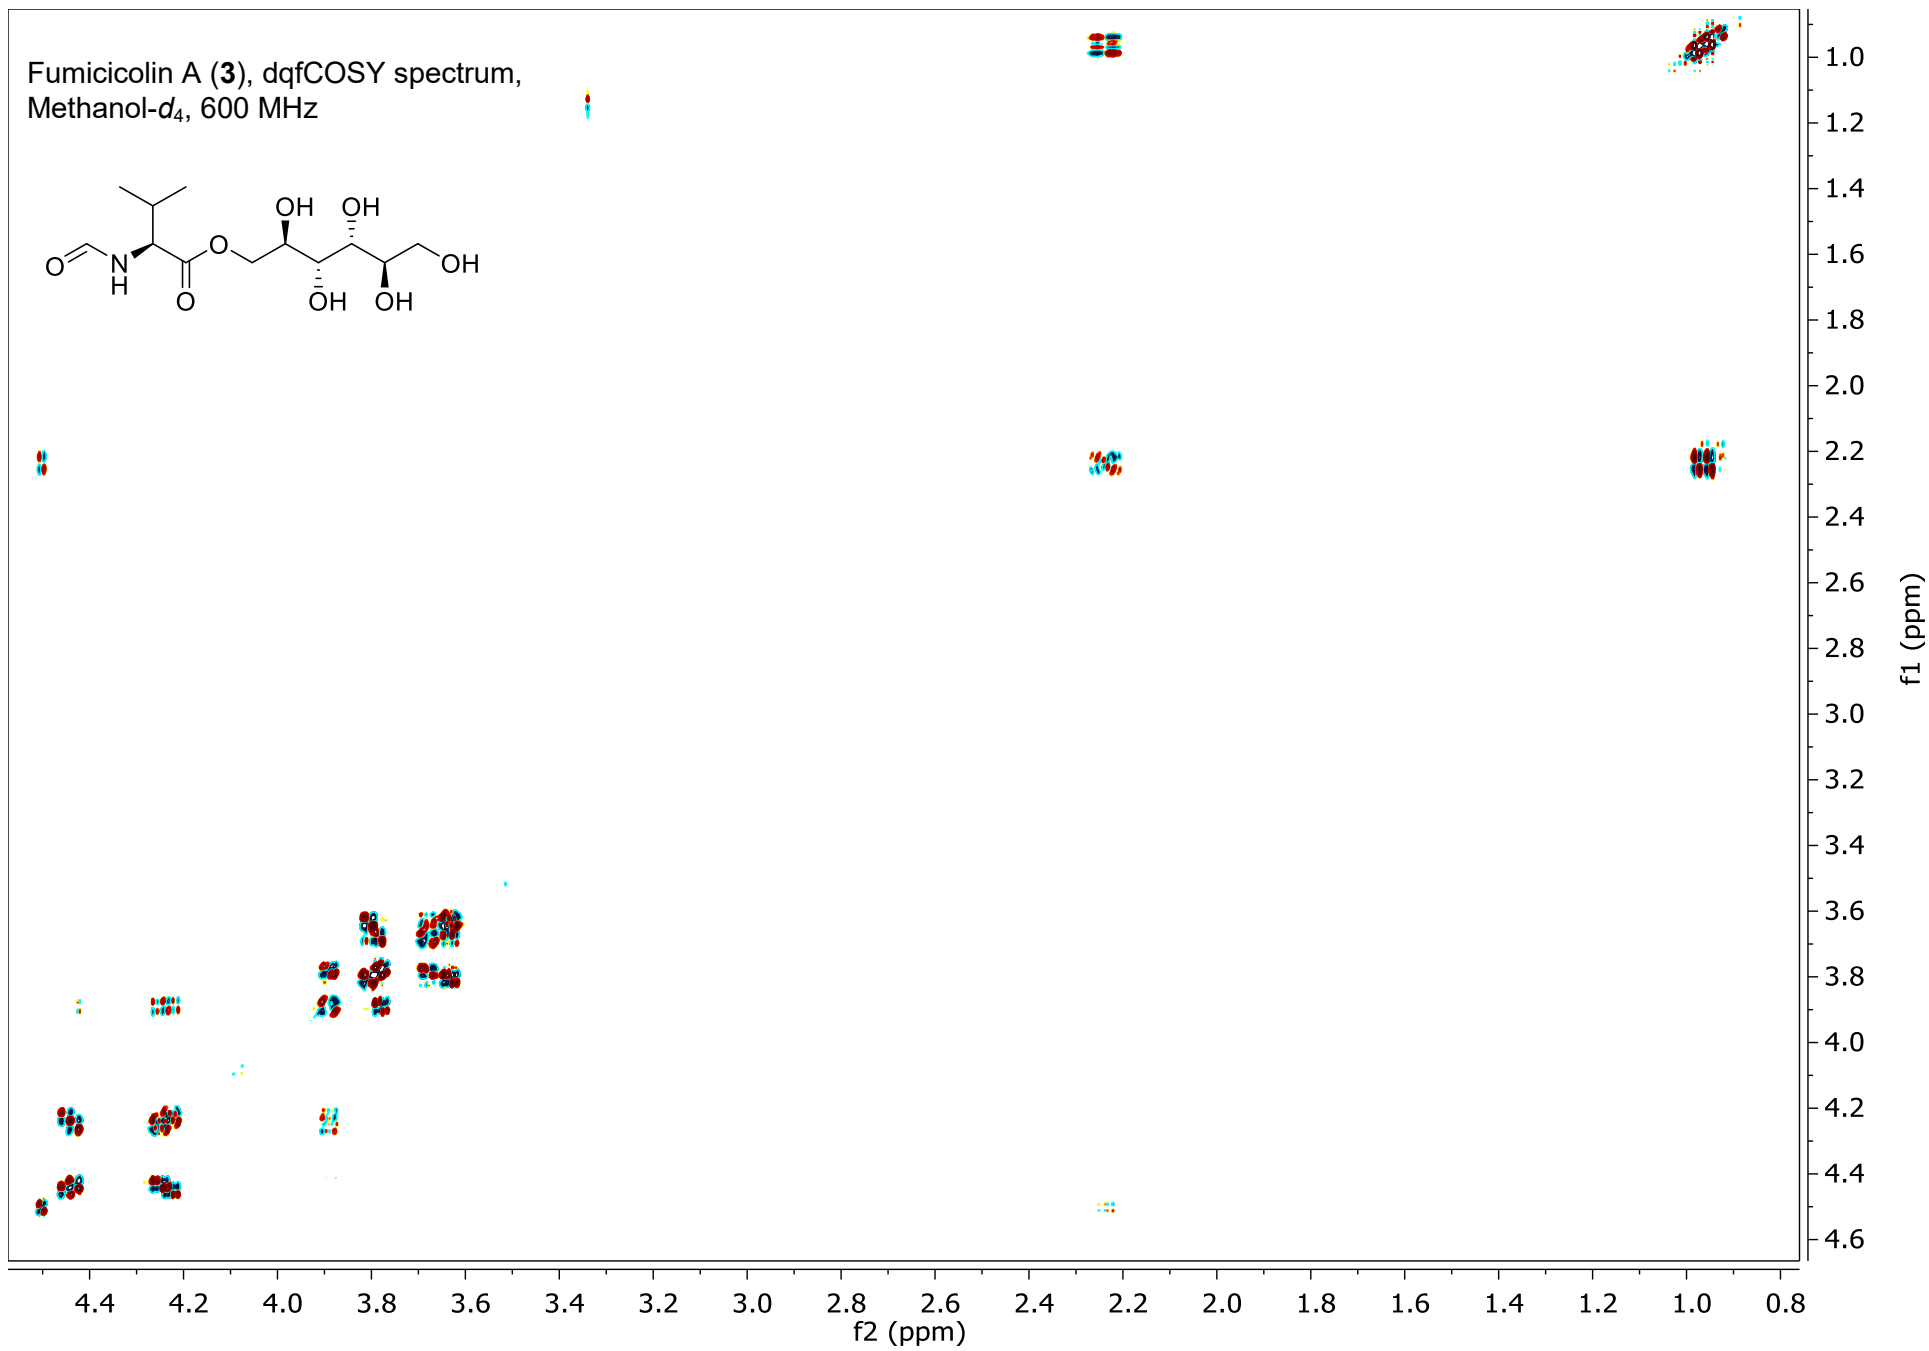

Fumicolin A (3), coupled HSQC spectrum,  
Methanol-*d*<sub>4</sub>, 600 MHz

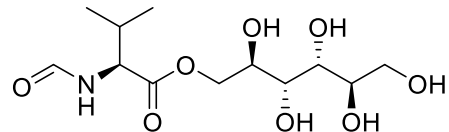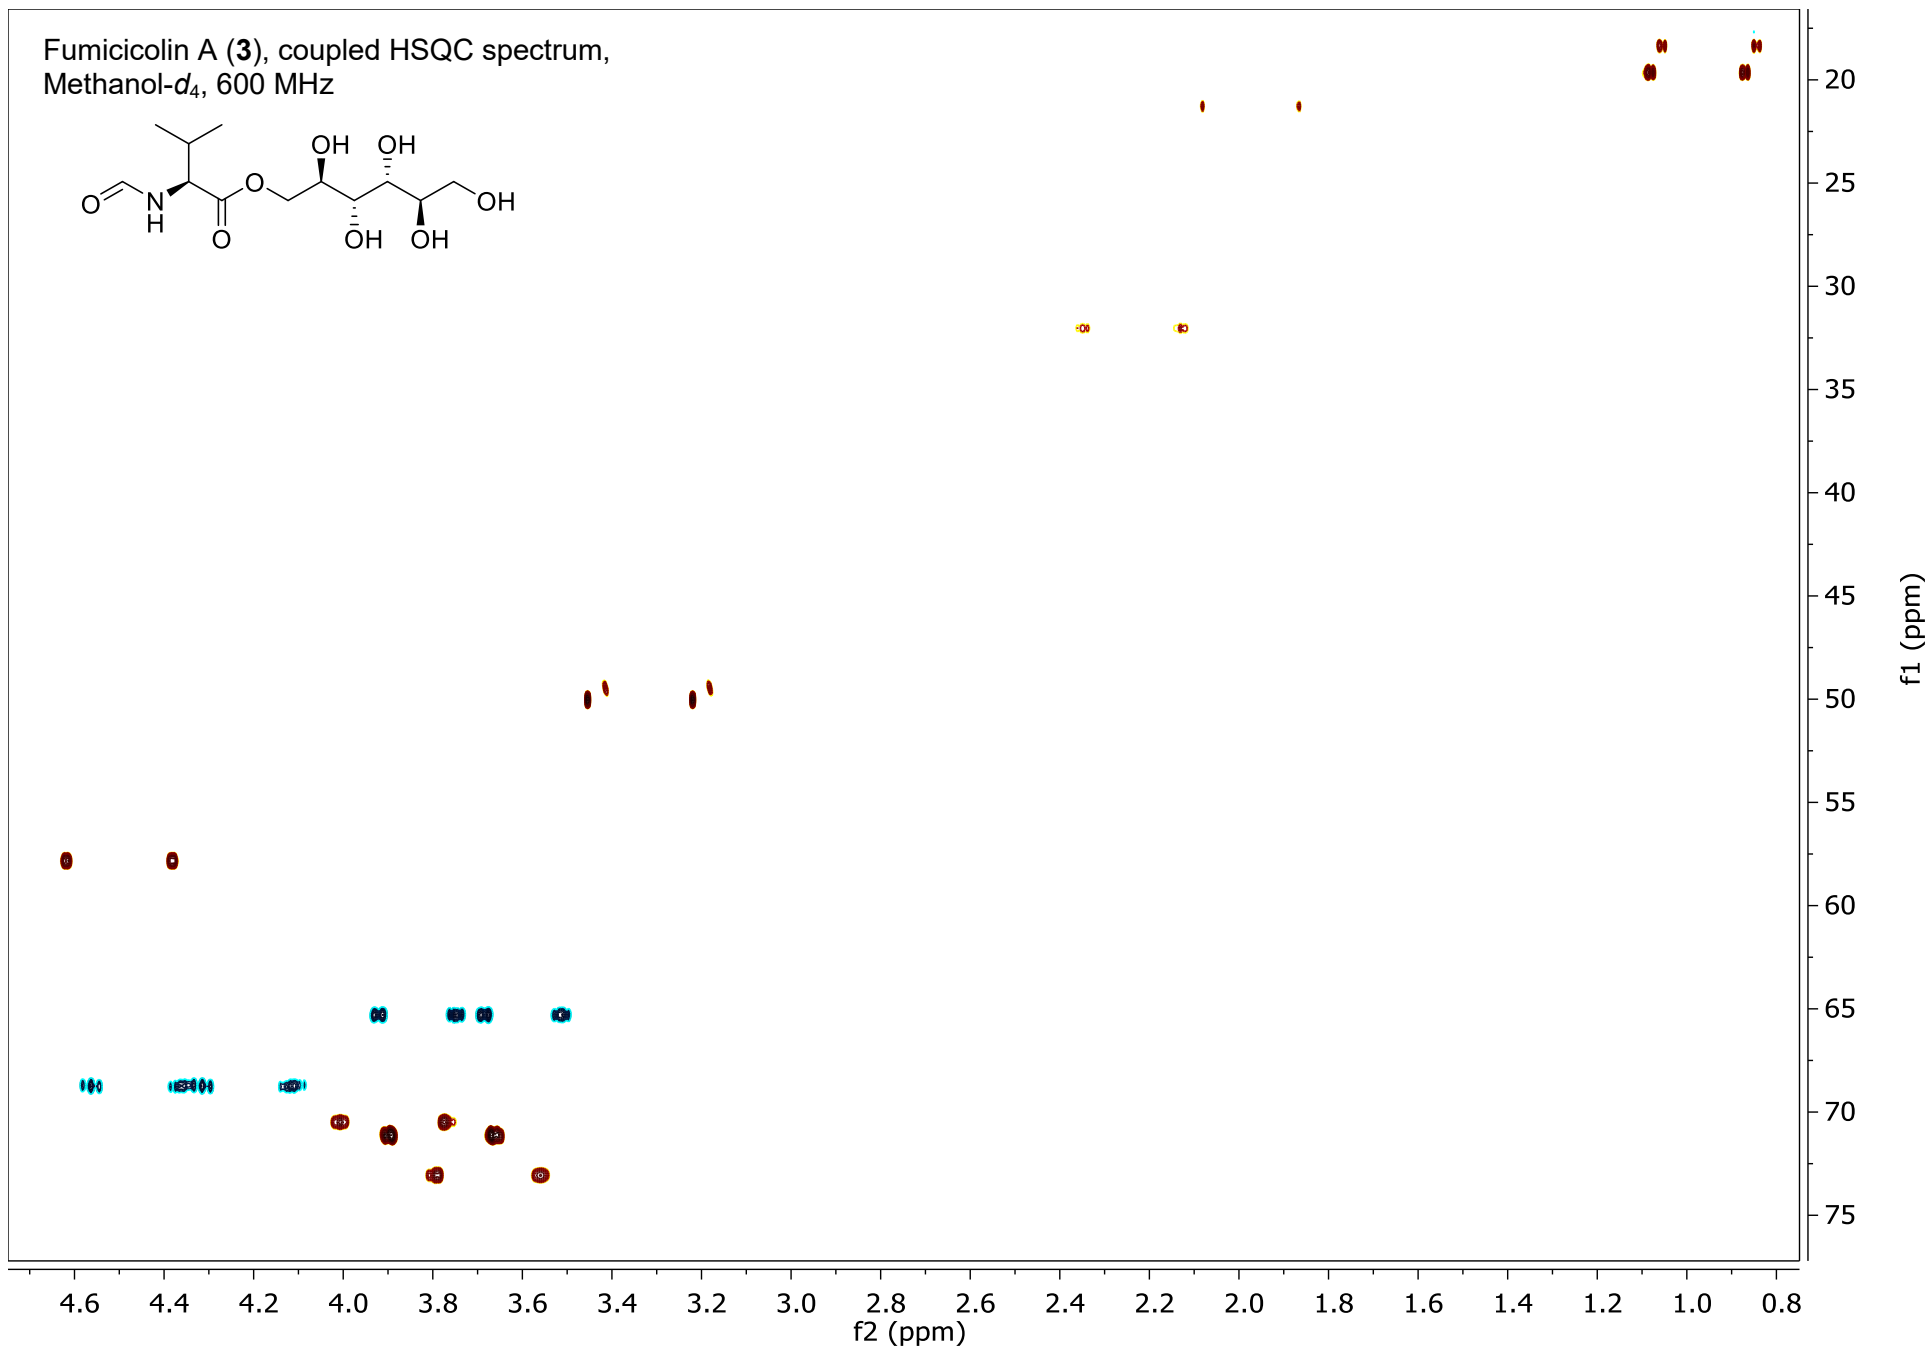

Fumicolin A (**3**), HMBC spectrum,  
Methanol-*d*<sub>4</sub>, 600 MHz

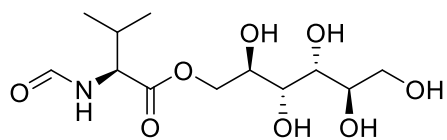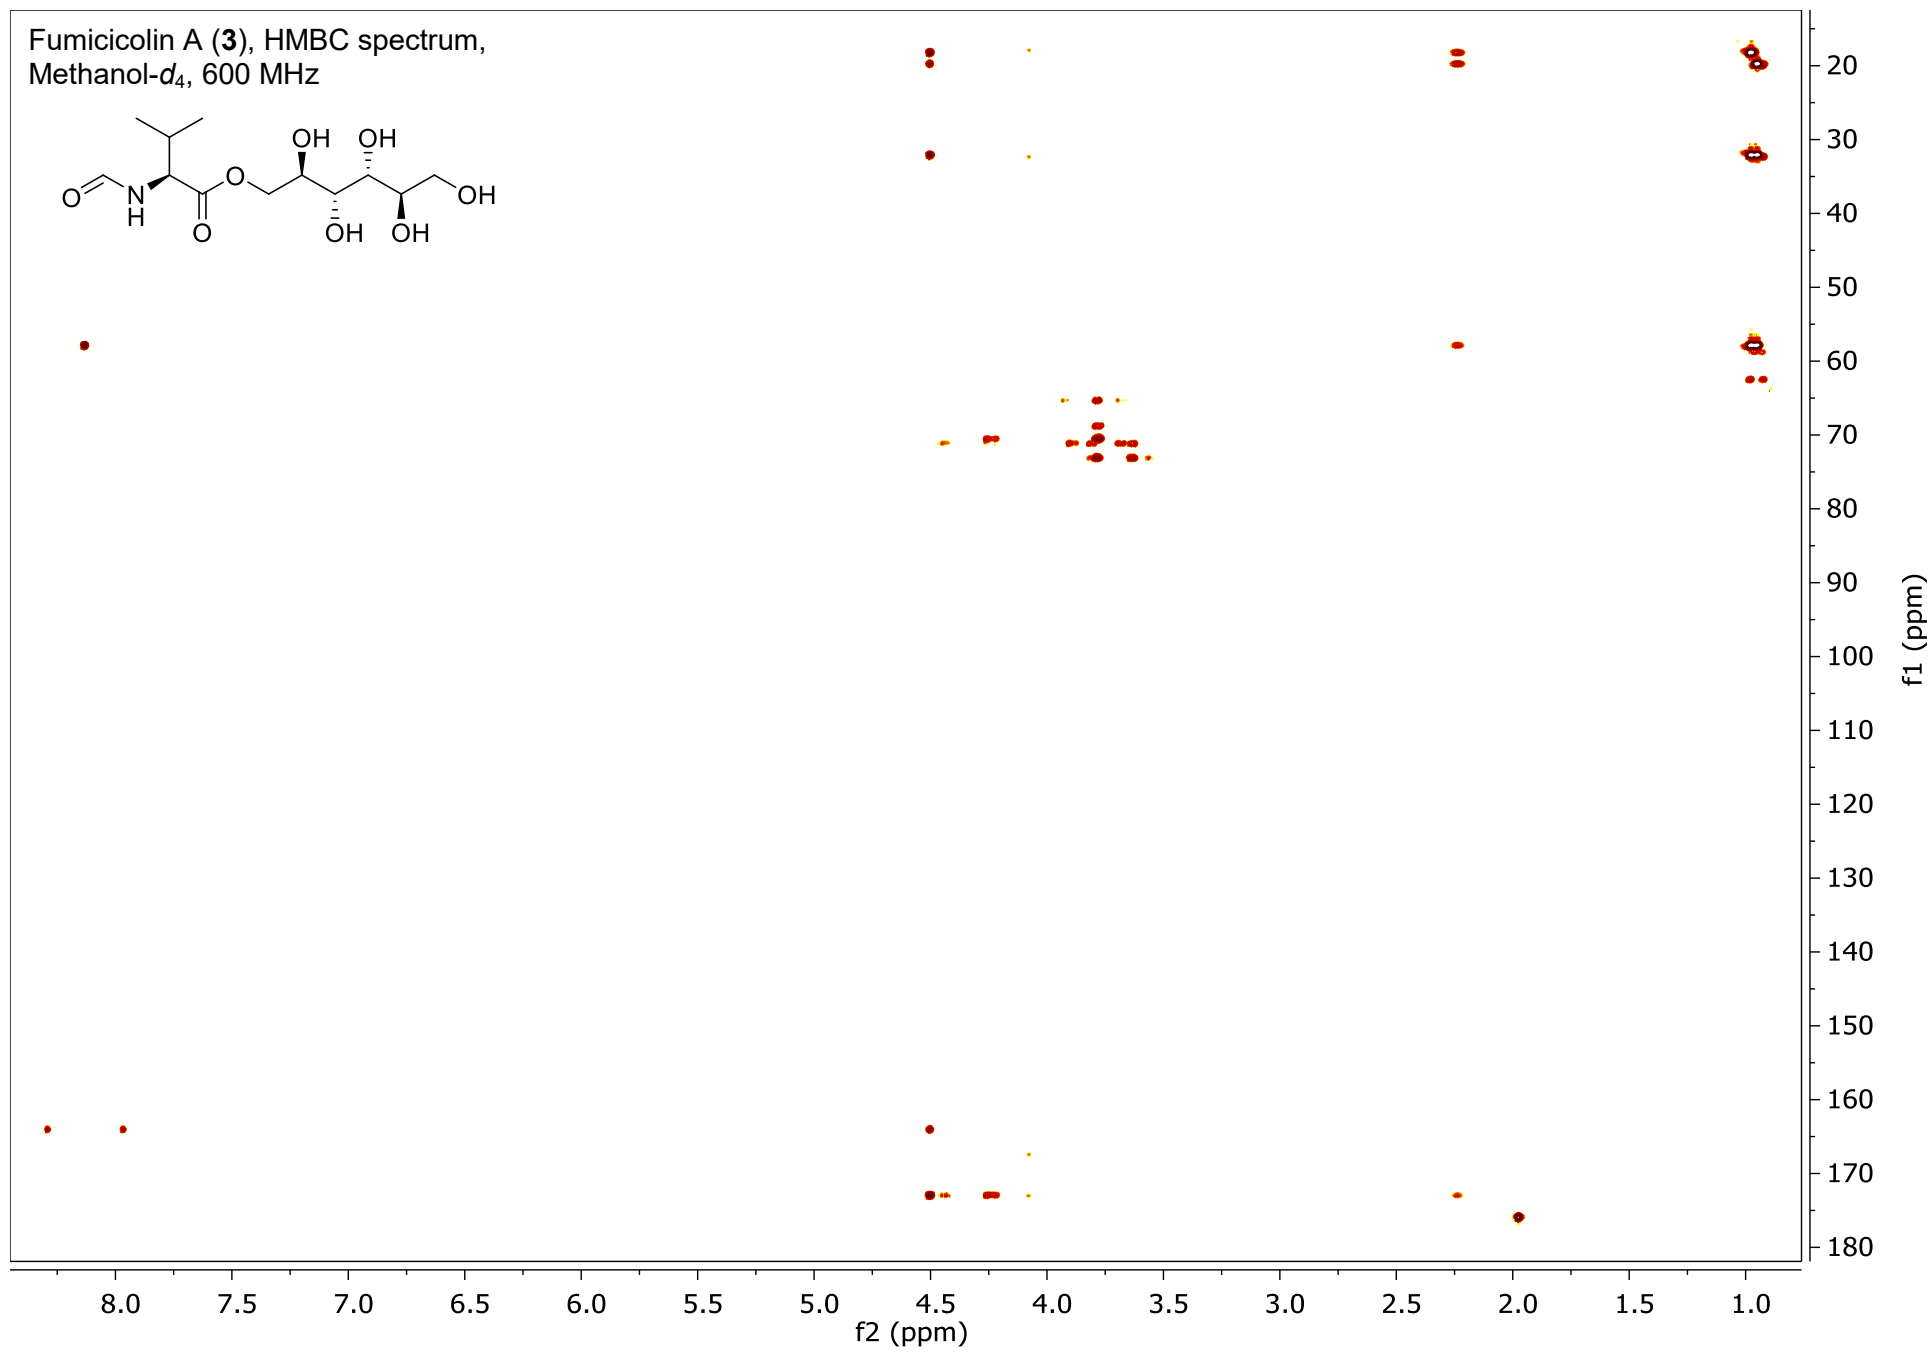

**<sup>1</sup>H (800 MHz) and <sup>13</sup>C (201 MHz) NMR spectroscopic data for *N*-formylvaline (4) in DMSO-*d*<sub>6</sub>**

Chemical shifts were referenced to  $\delta(\text{CHD}_2\text{SOCD}_3) = 2.50$  and  $\delta(^{13}\text{C}\text{HD}_2\text{SOCD}_3) = 39.5$ . <sup>13</sup>C chemical shifts were determined via HMBC and HSQC spectra. One-bond (<sup>13</sup>C, <sup>1</sup>H)-*J*-coupling constants were determined from the acquired HSQC spectra. (<sup>1</sup>H, <sup>1</sup>H)-*J*-coupling constants were determined from the <sup>1</sup>H or dqfCOSY spectra. HMBC correlations are from the proton(s) stated to the indicated <sup>13</sup>C atom.

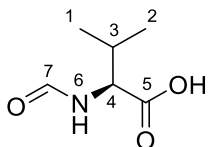

| No. | $\delta_c$ | Proton | $^1J_{CH}$ | $\delta_H$ ( $J_{HH}$ [Hz])                                        | HMBC    |
|-----|------------|--------|------------|--------------------------------------------------------------------|---------|
| 1   | 17.9       | 1-H    | 124.5      | 0.79 ( $J_{1,3} = 6.5$ Hz)                                         | 2       |
| 2   | 19.7       | 2-H    | 124.6      | 0.77 ( $J_{2,3} = 6.5$ Hz)                                         | 1       |
| 3   | 30.8       | 3-H    | 128.7      | 2.04 ( $J_{3,1} = 6.5$ Hz, $J_{3,2} = 6.5$ Hz, $J_{3,4} = 7.5$ Hz) | 1, 2    |
| 4   | 57.9       | 4-H    | 136.7      | 3.78 ( $J_{4,3} = 7.5$ Hz)                                         | 1, 2, 7 |
| 5   | ND         |        |            |                                                                    |         |
| 6   |            | N-H    |            | 7.43 (br s)                                                        |         |
| 7   | 160.1      | 7-H    | 187.7      | 8.01                                                               |         |

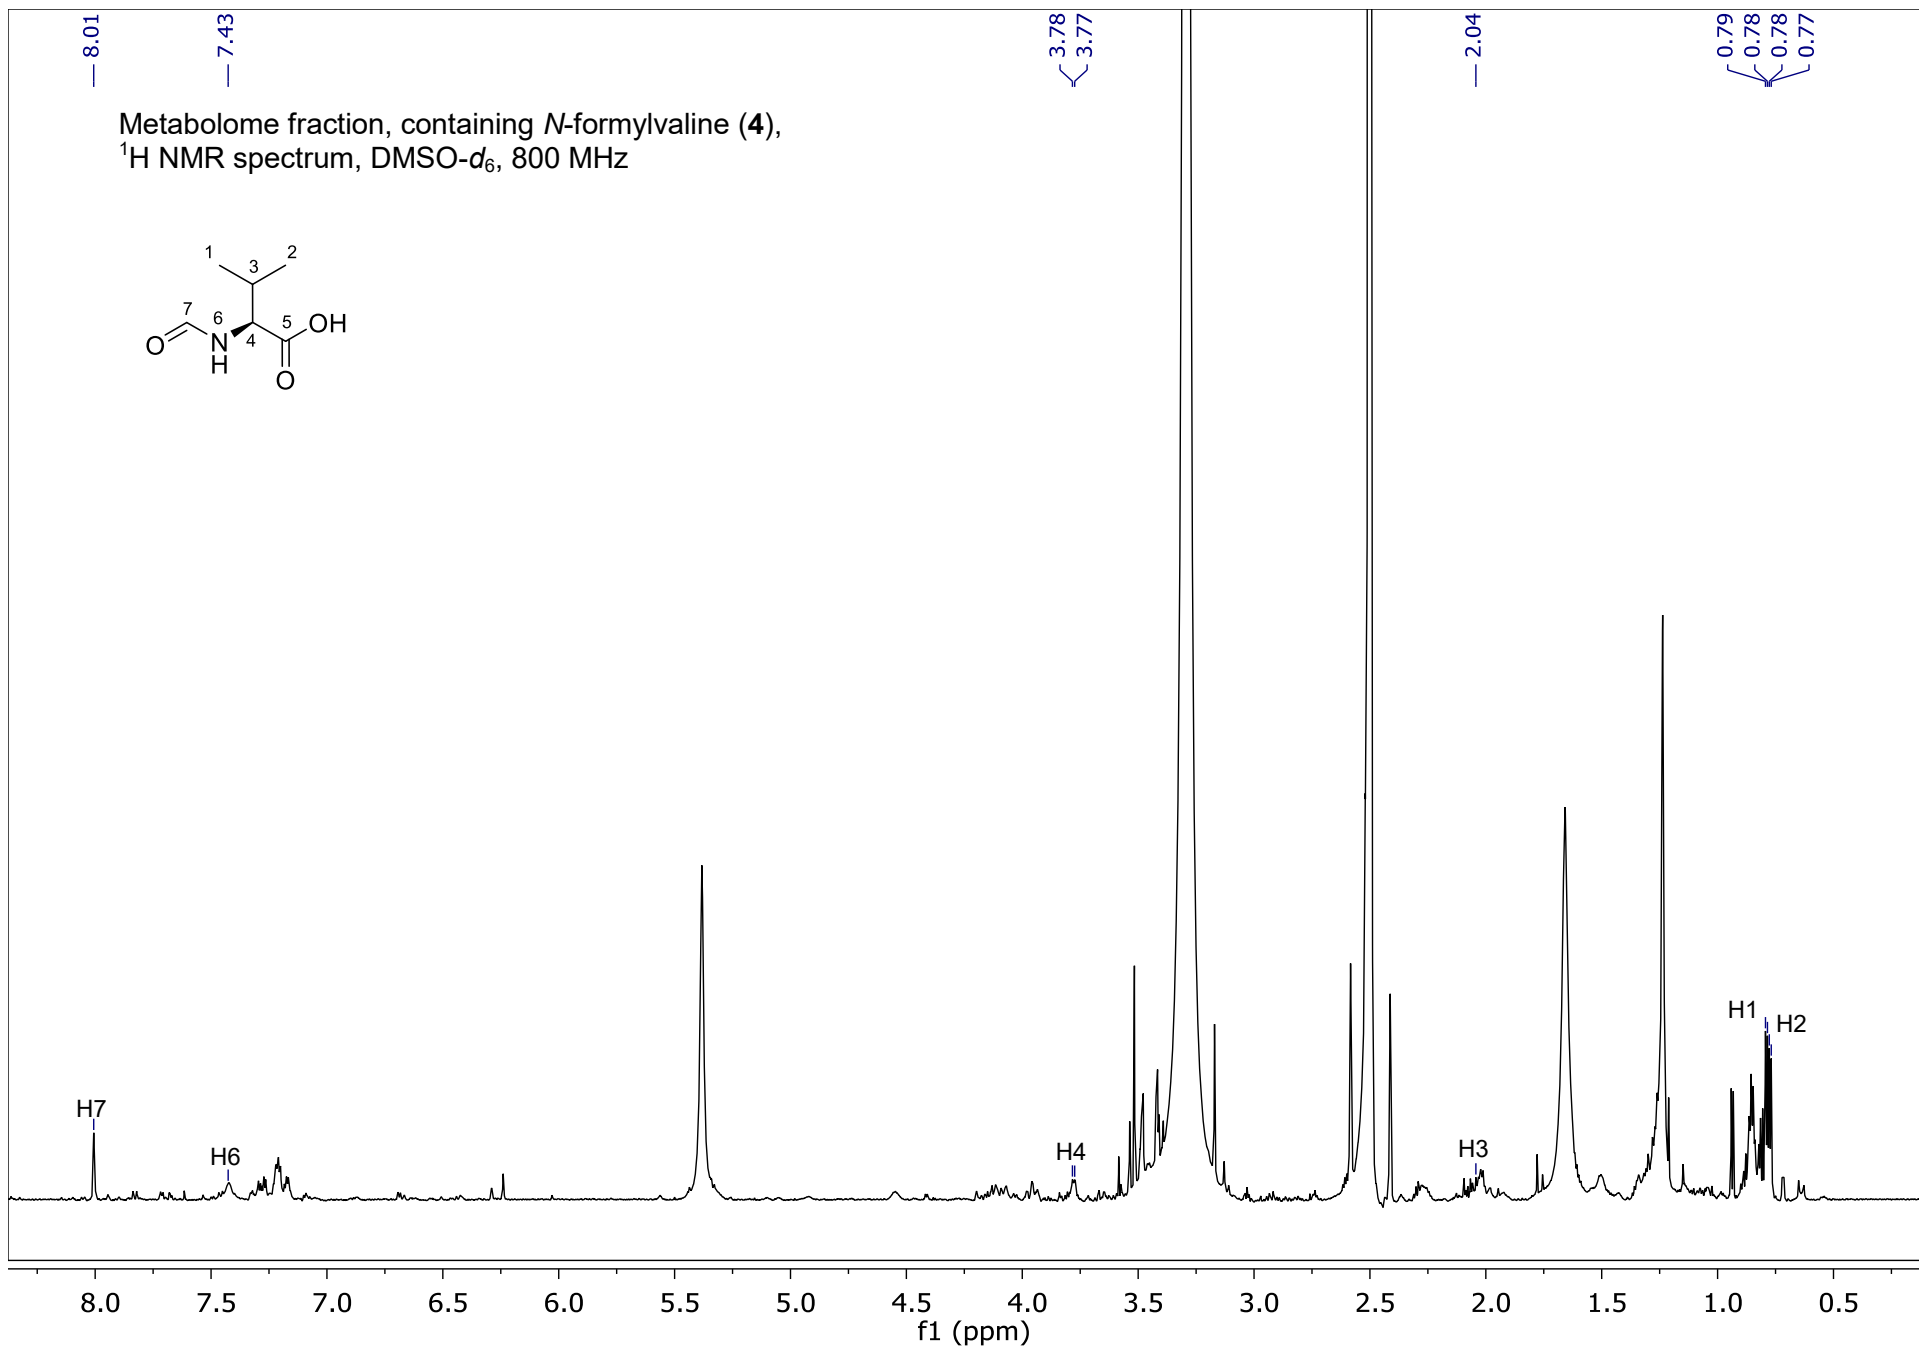

Metabolome fraction, containing *N*-formylvaline (**4**),  
dqfCOSY spectrum, DMSO-*d*<sub>6</sub>, 800 MHz

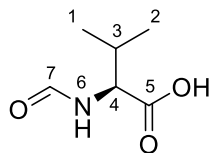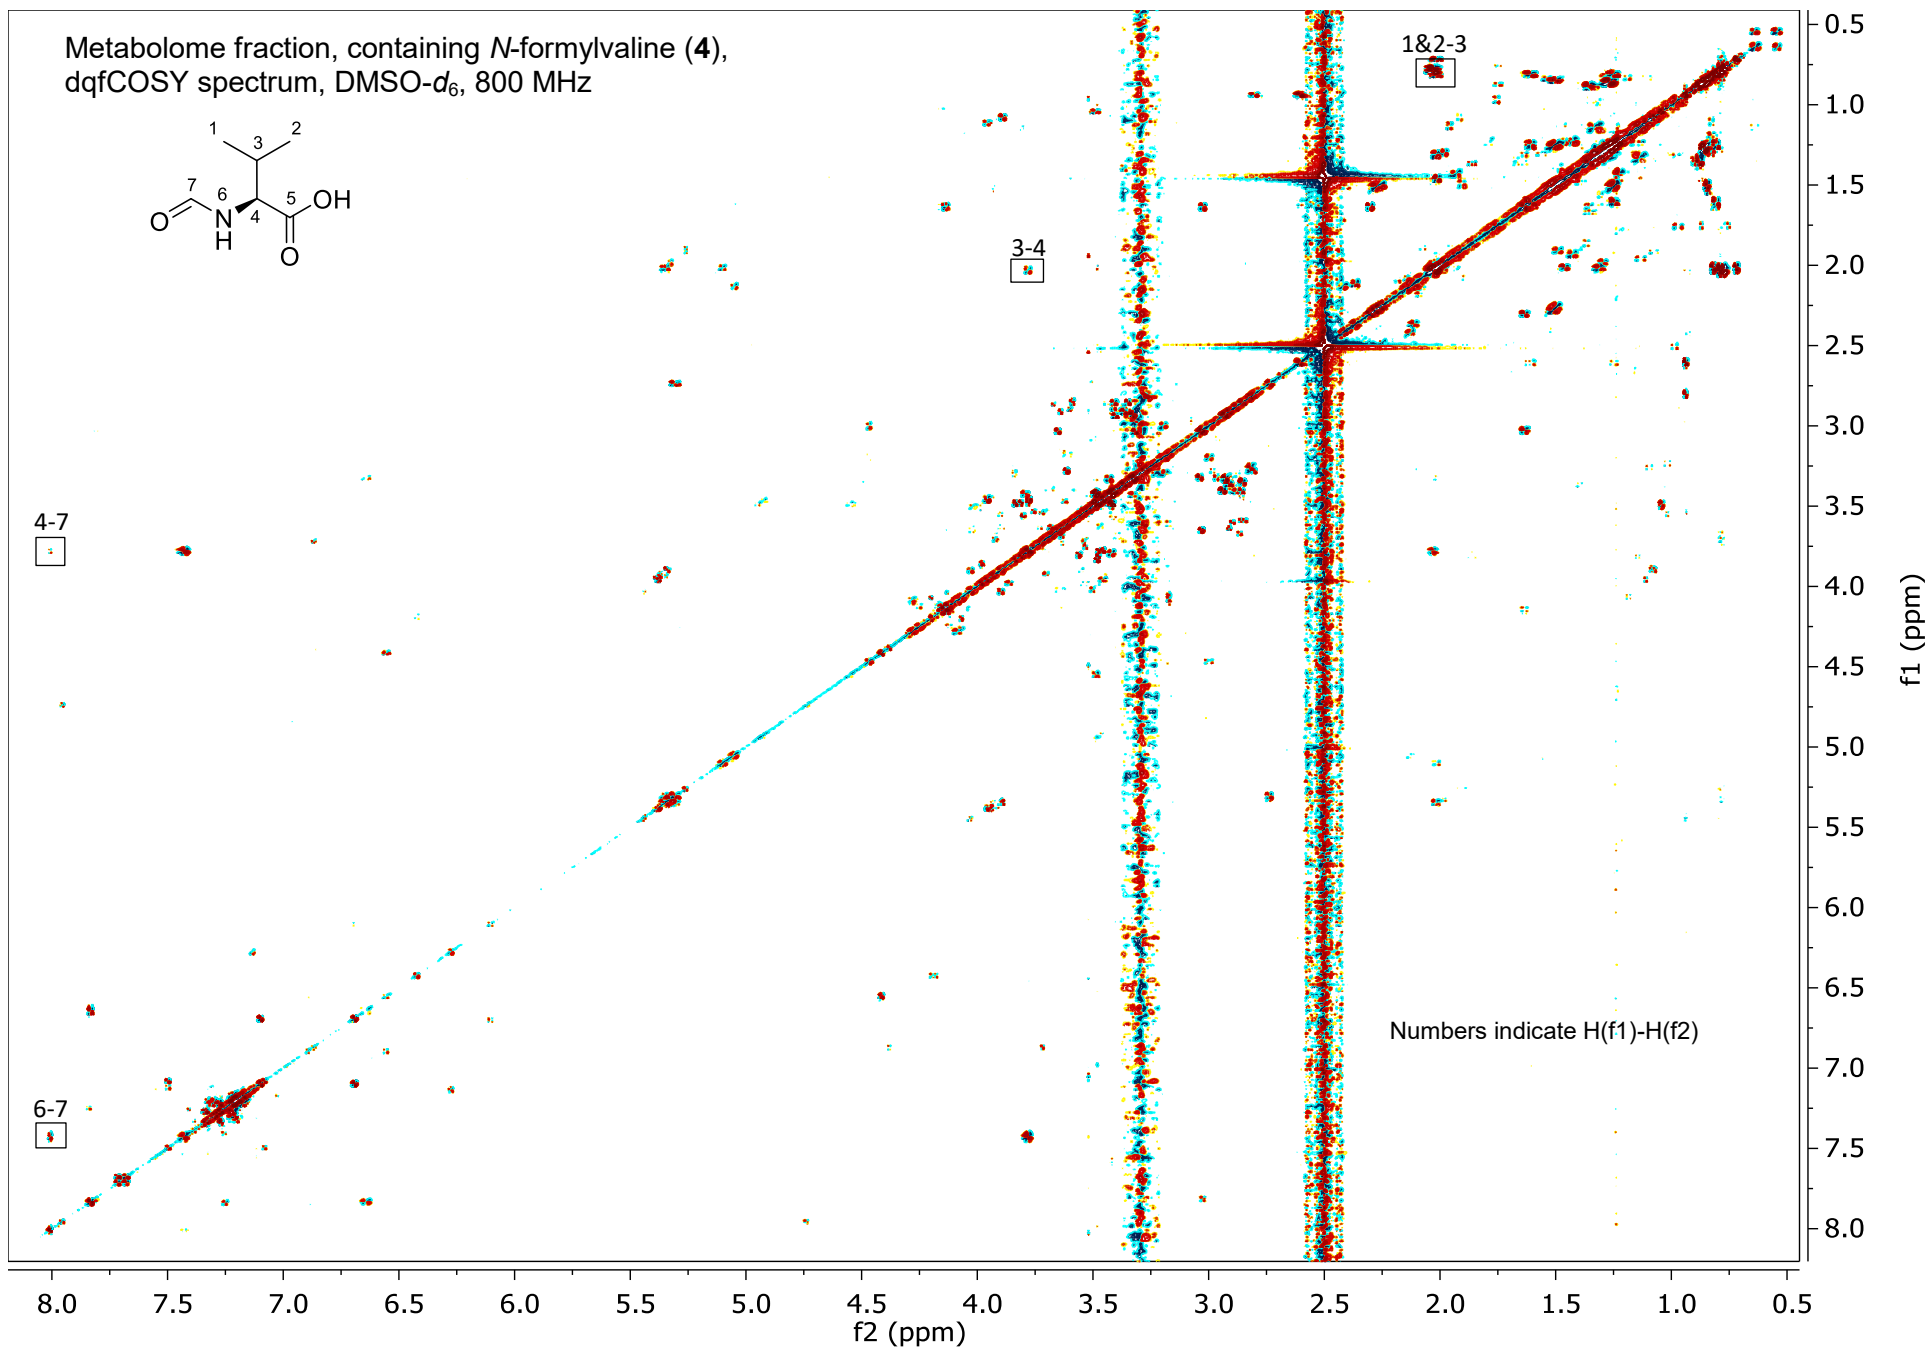

Metabolome fraction, containing *N*-formylvaline (**4**),  
coupled HSQC spectrum, DMSO-*d*<sub>6</sub>, 800 MHz

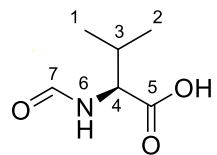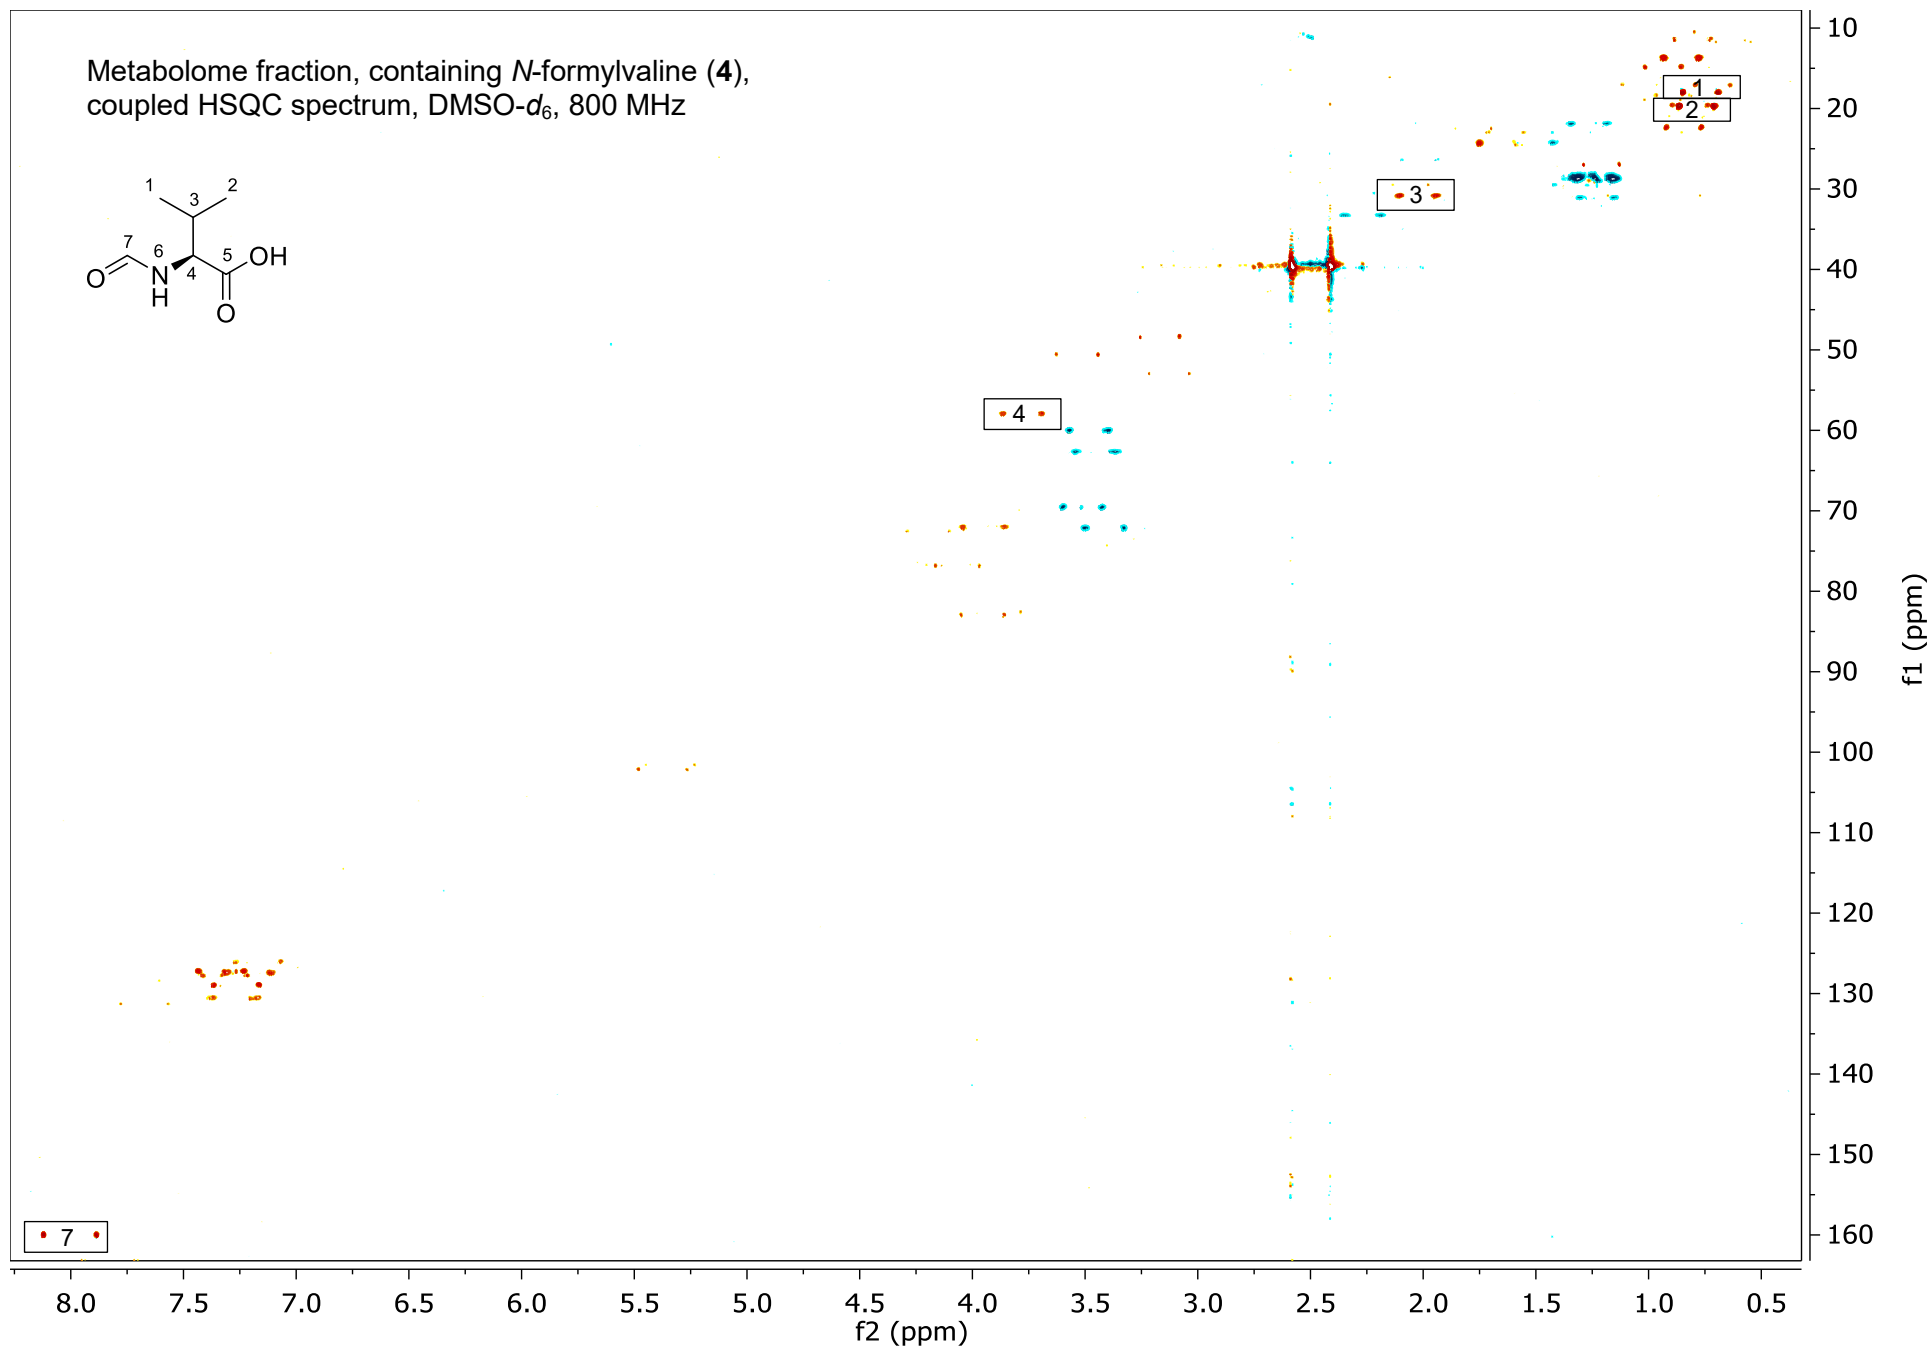



Metabolome fraction, containing *N*-formylvaline (**4**),  
HMBC spectrum, DMSO-*d*<sub>6</sub>, 800 MHz

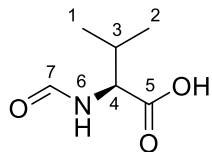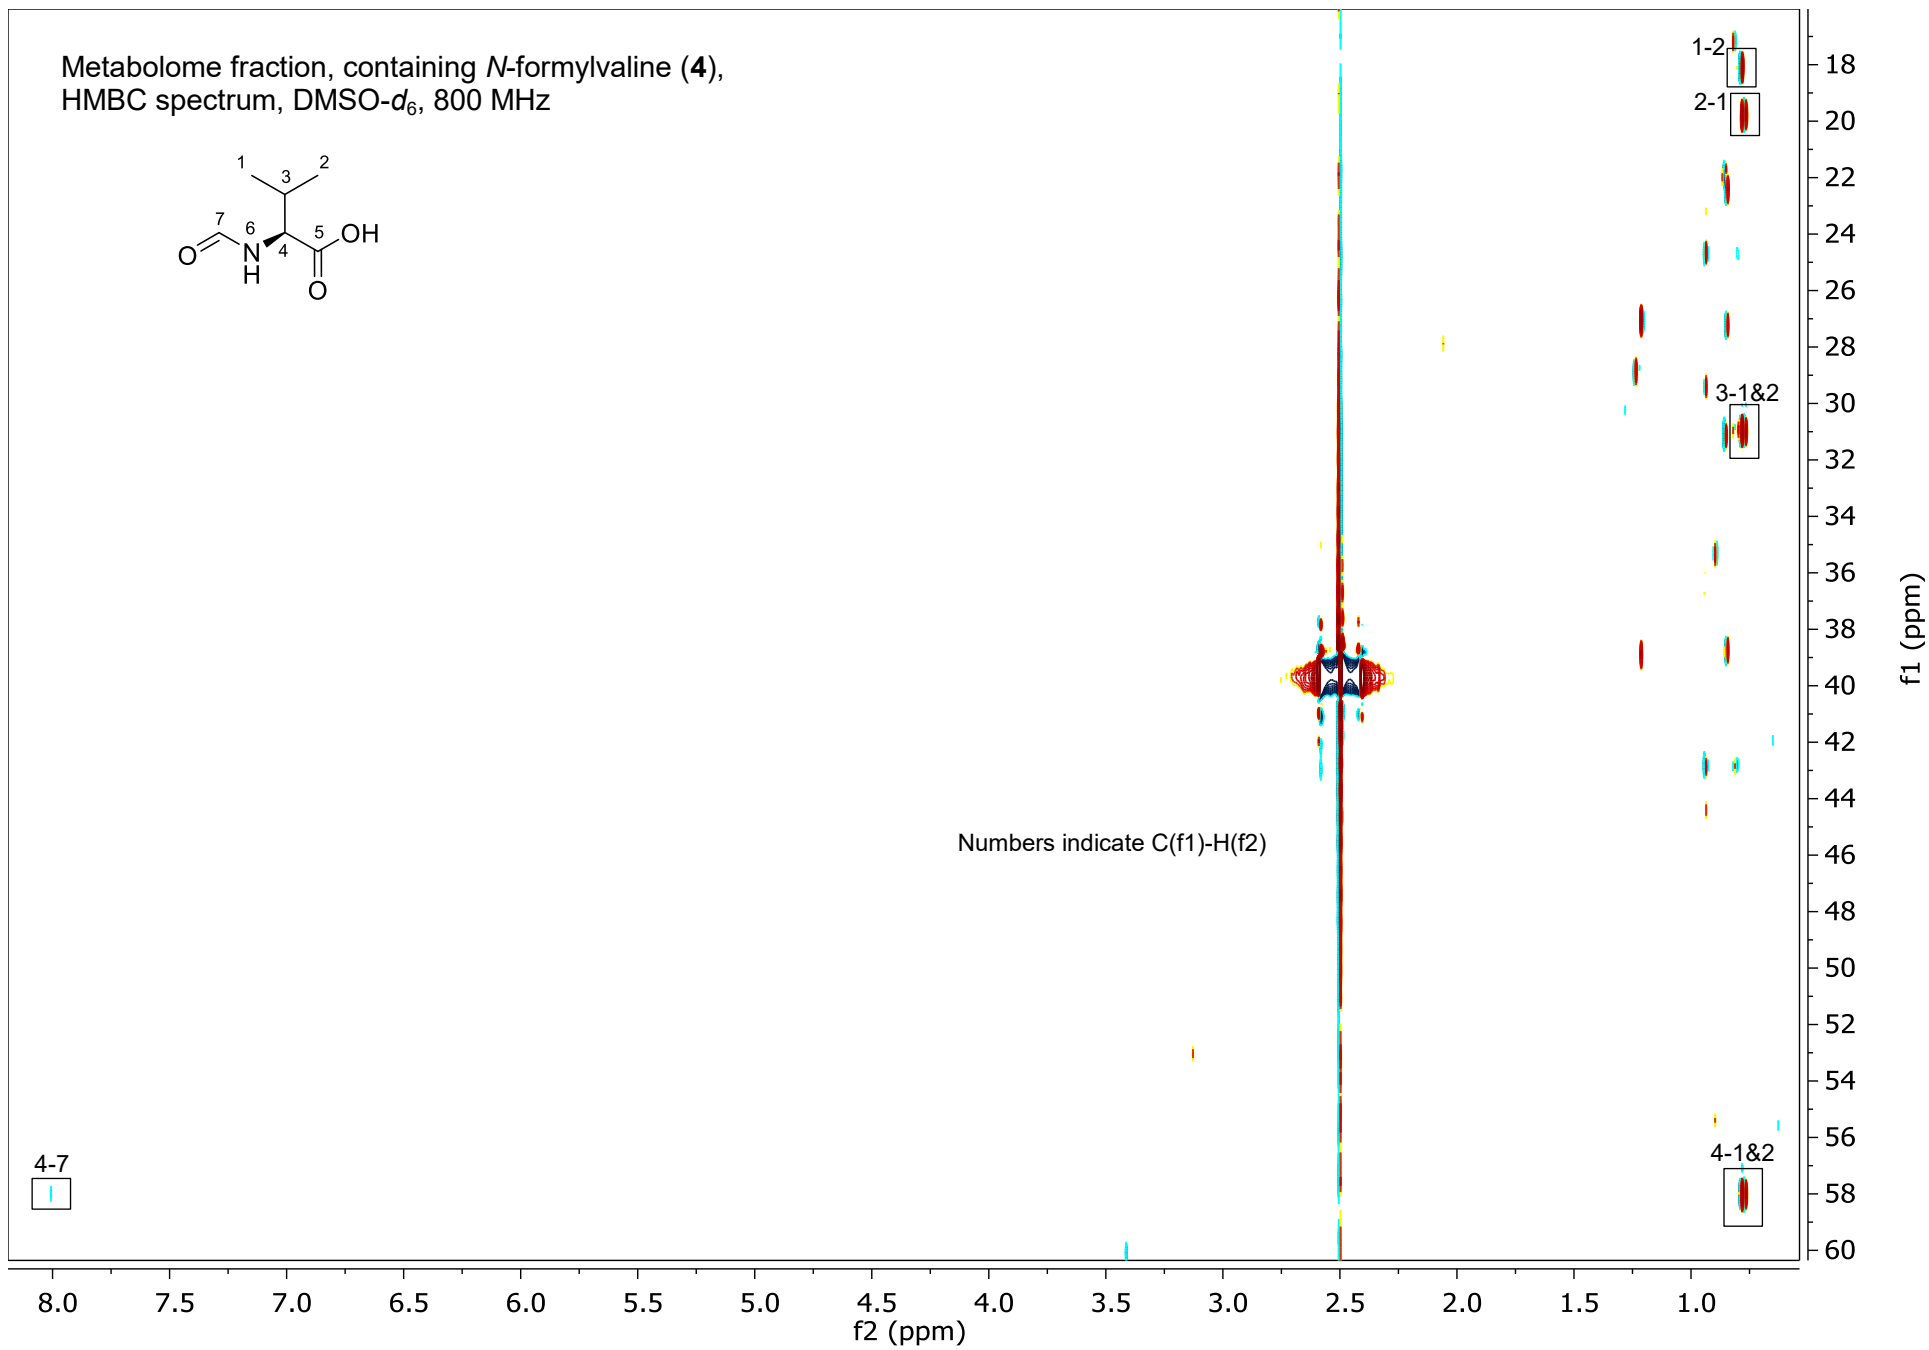

**$^1\text{H}$  (600 MHz) and  $^{13}\text{C}$  (151 MHz) NMR spectroscopic data for (S)-2-isocyanoisovaleric acid (5) in  $\text{D}_2\text{O}$**

Chemical shifts were referenced to  $\delta(\text{H}_2\text{O}) = 4.80$  and  $\delta(^{13}\text{C}_\text{H}_3\text{OD}) = 49.0$ . ( $^1\text{H}, ^1\text{H}$ )- $J$ -coupling constants were determined from the acquired  $^1\text{H}$  or dqfCOSY spectra. HMBC correlations are from the proton(s) stated to the indicated  $^{13}\text{C}$  atom.

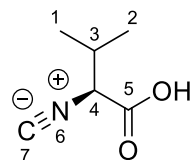

| No. | $\delta\text{c}$ | Proton | $\delta\text{H}$ ( $J_{\text{HH}}$ [Hz])                           | HMBC    |
|-----|------------------|--------|--------------------------------------------------------------------|---------|
| 1   | 16.0             | 1-H    | 0.95 ( $J_{1,3} = 6.7$ Hz)                                         | 2, 3, 4 |
| 2   | 19.1             | 2-H    | 1.07 ( $J_{2,3} = 6.7$ Hz)                                         | 1, 3, 4 |
| 3   | 30.6             | 3-H    | 2.28 ( $J_{3,1} = 6.7$ Hz, $J_{3,2} = 6.5$ Hz, $J_{3,4} = 7.5$ Hz) | 1, 2, 4 |
| 4   | 66.0             | 4-H    | 4.21 ( $J_{4,3} = 7.5$ Hz)                                         | 1, 2, 3 |
| 5   | 173.5            |        |                                                                    | 4       |
| 7   | 153.1            |        |                                                                    | 4       |

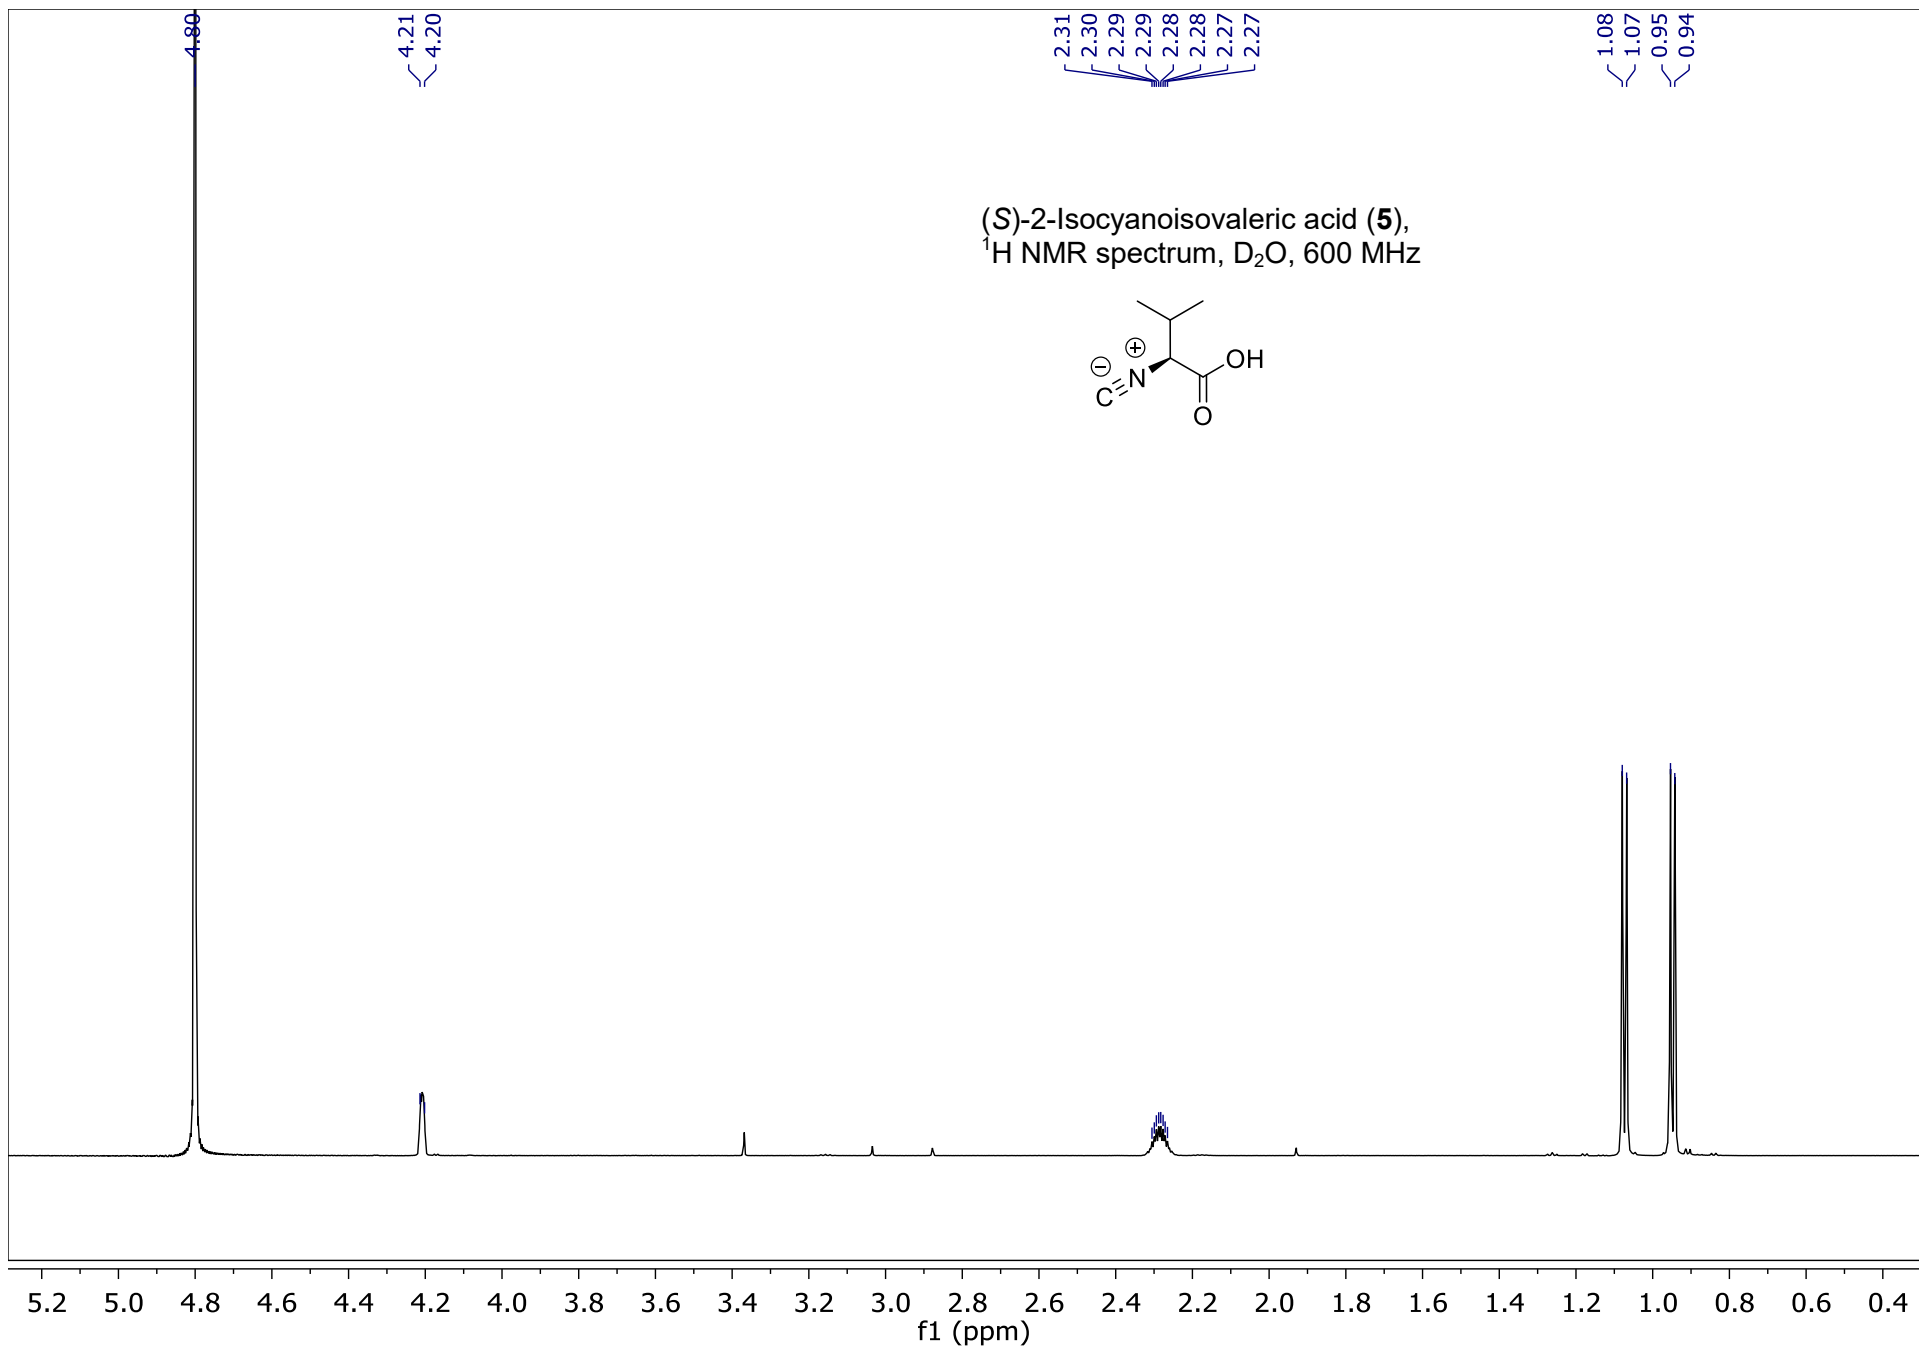

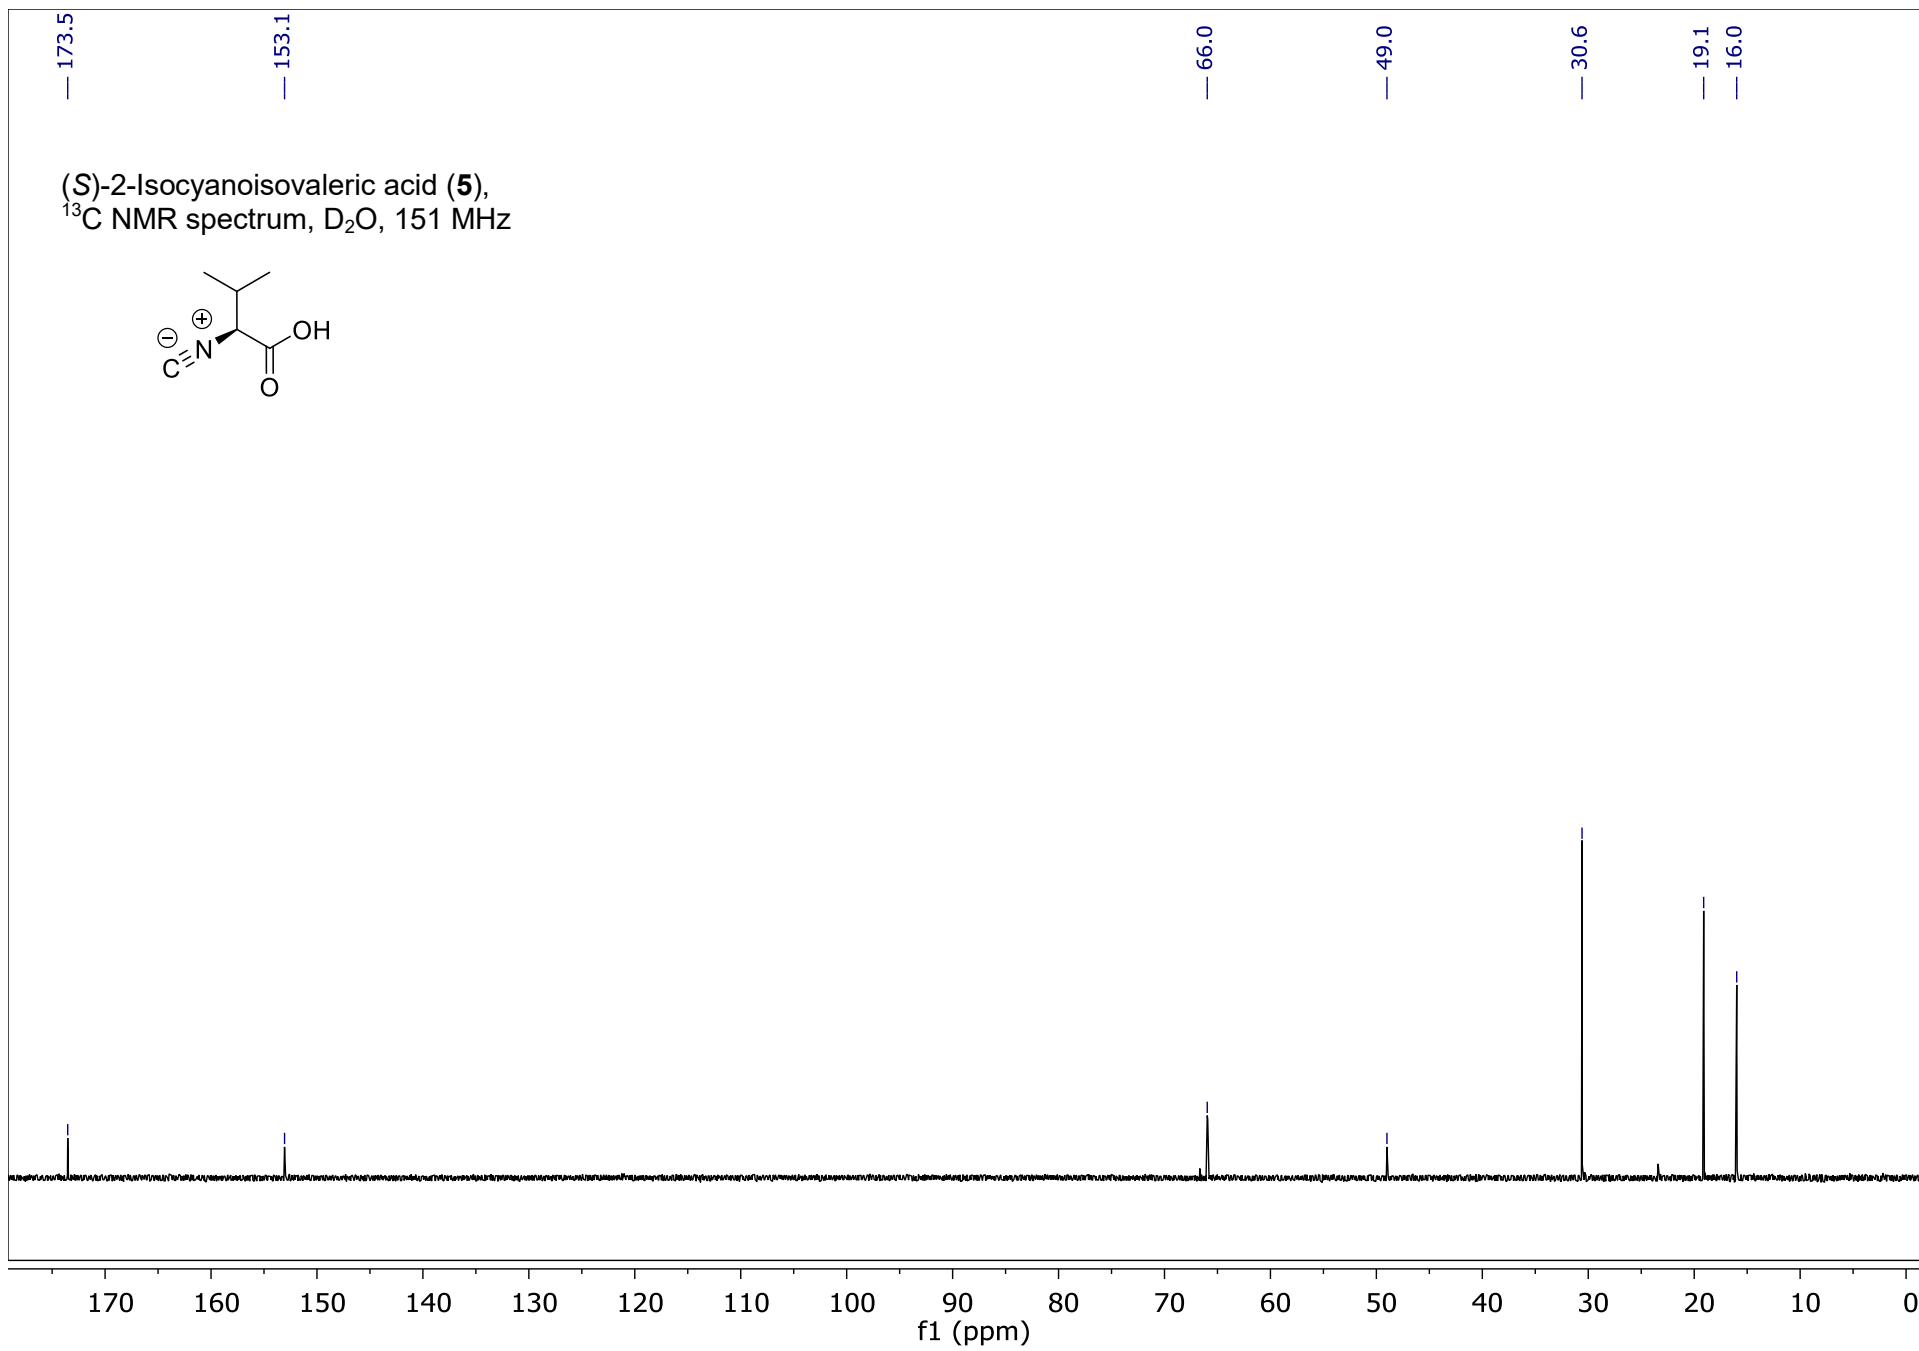

(S)-2-Isocyanoisovaleric acid (**5**),  
dqfCOSY spectrum, D<sub>2</sub>O, 600 MHz

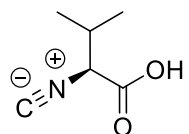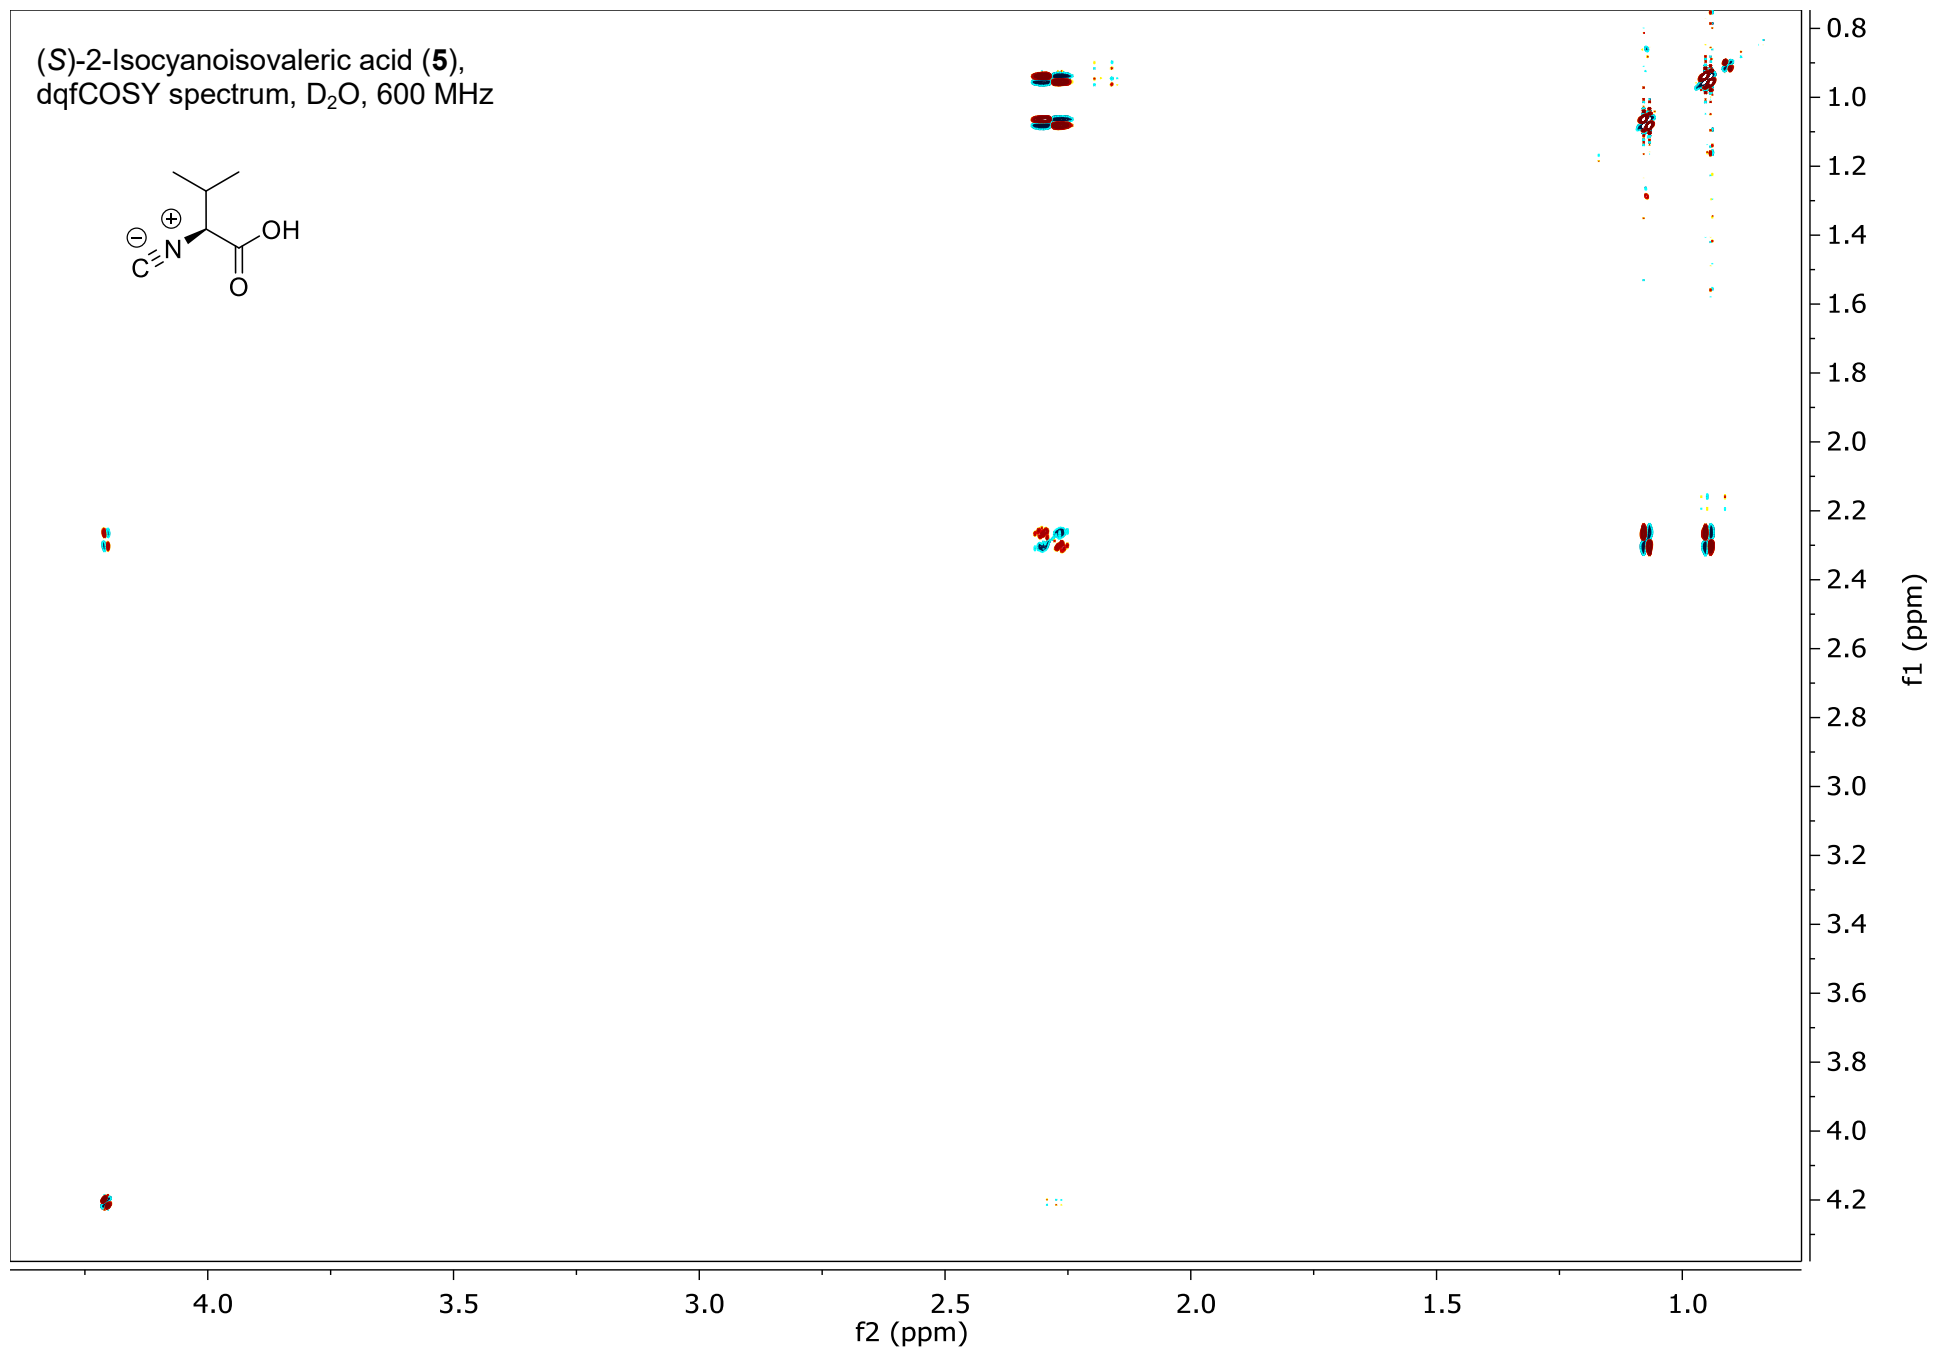

(S)-2-Isocyanoisovaleric acid (**5**),  
coupled HSQC spectrum, D<sub>2</sub>O, 600 MHz

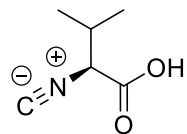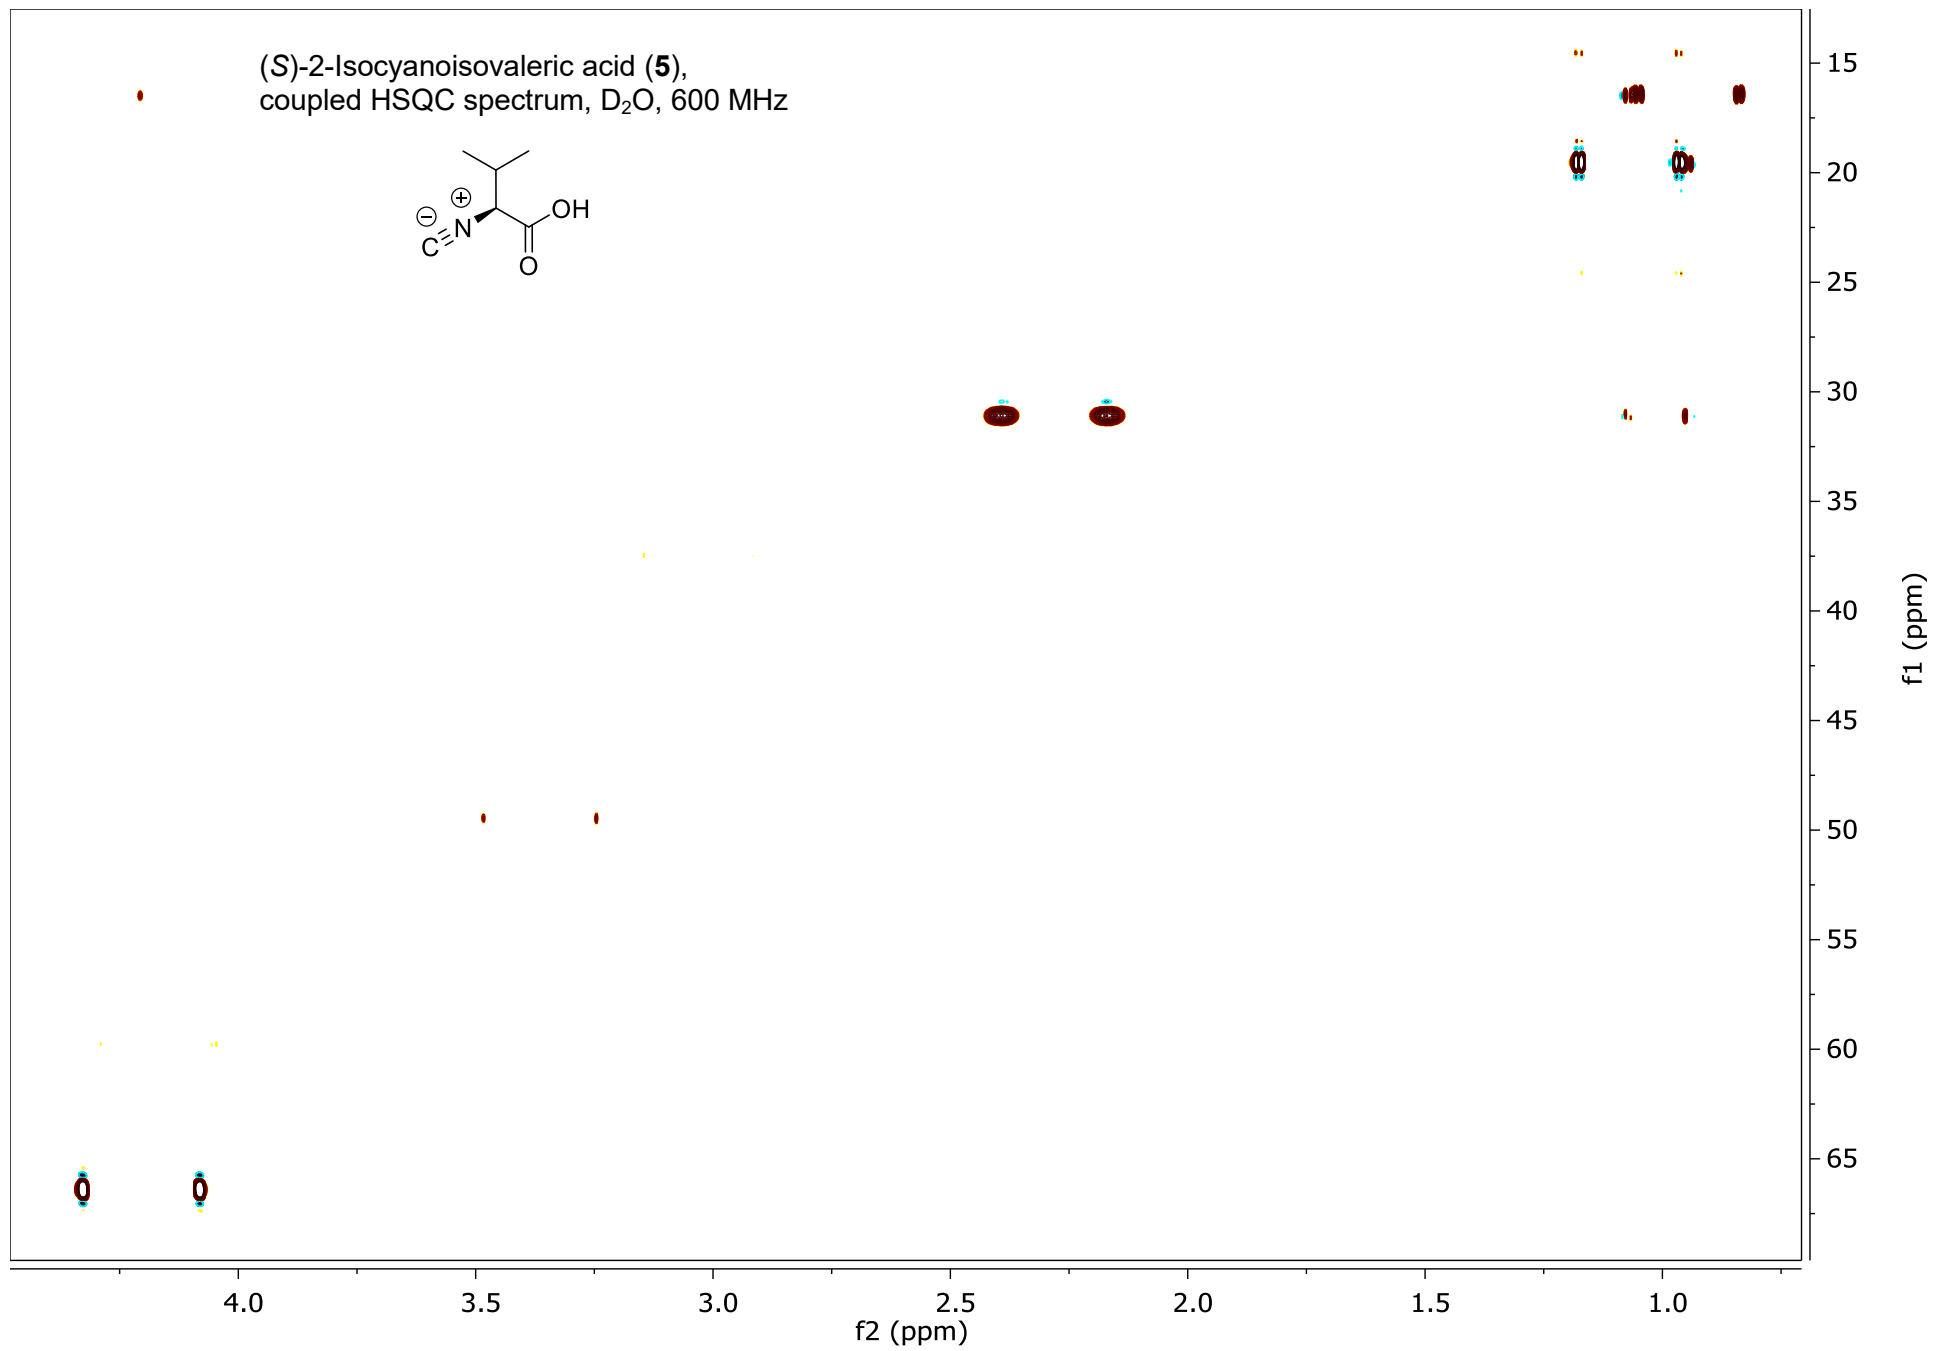

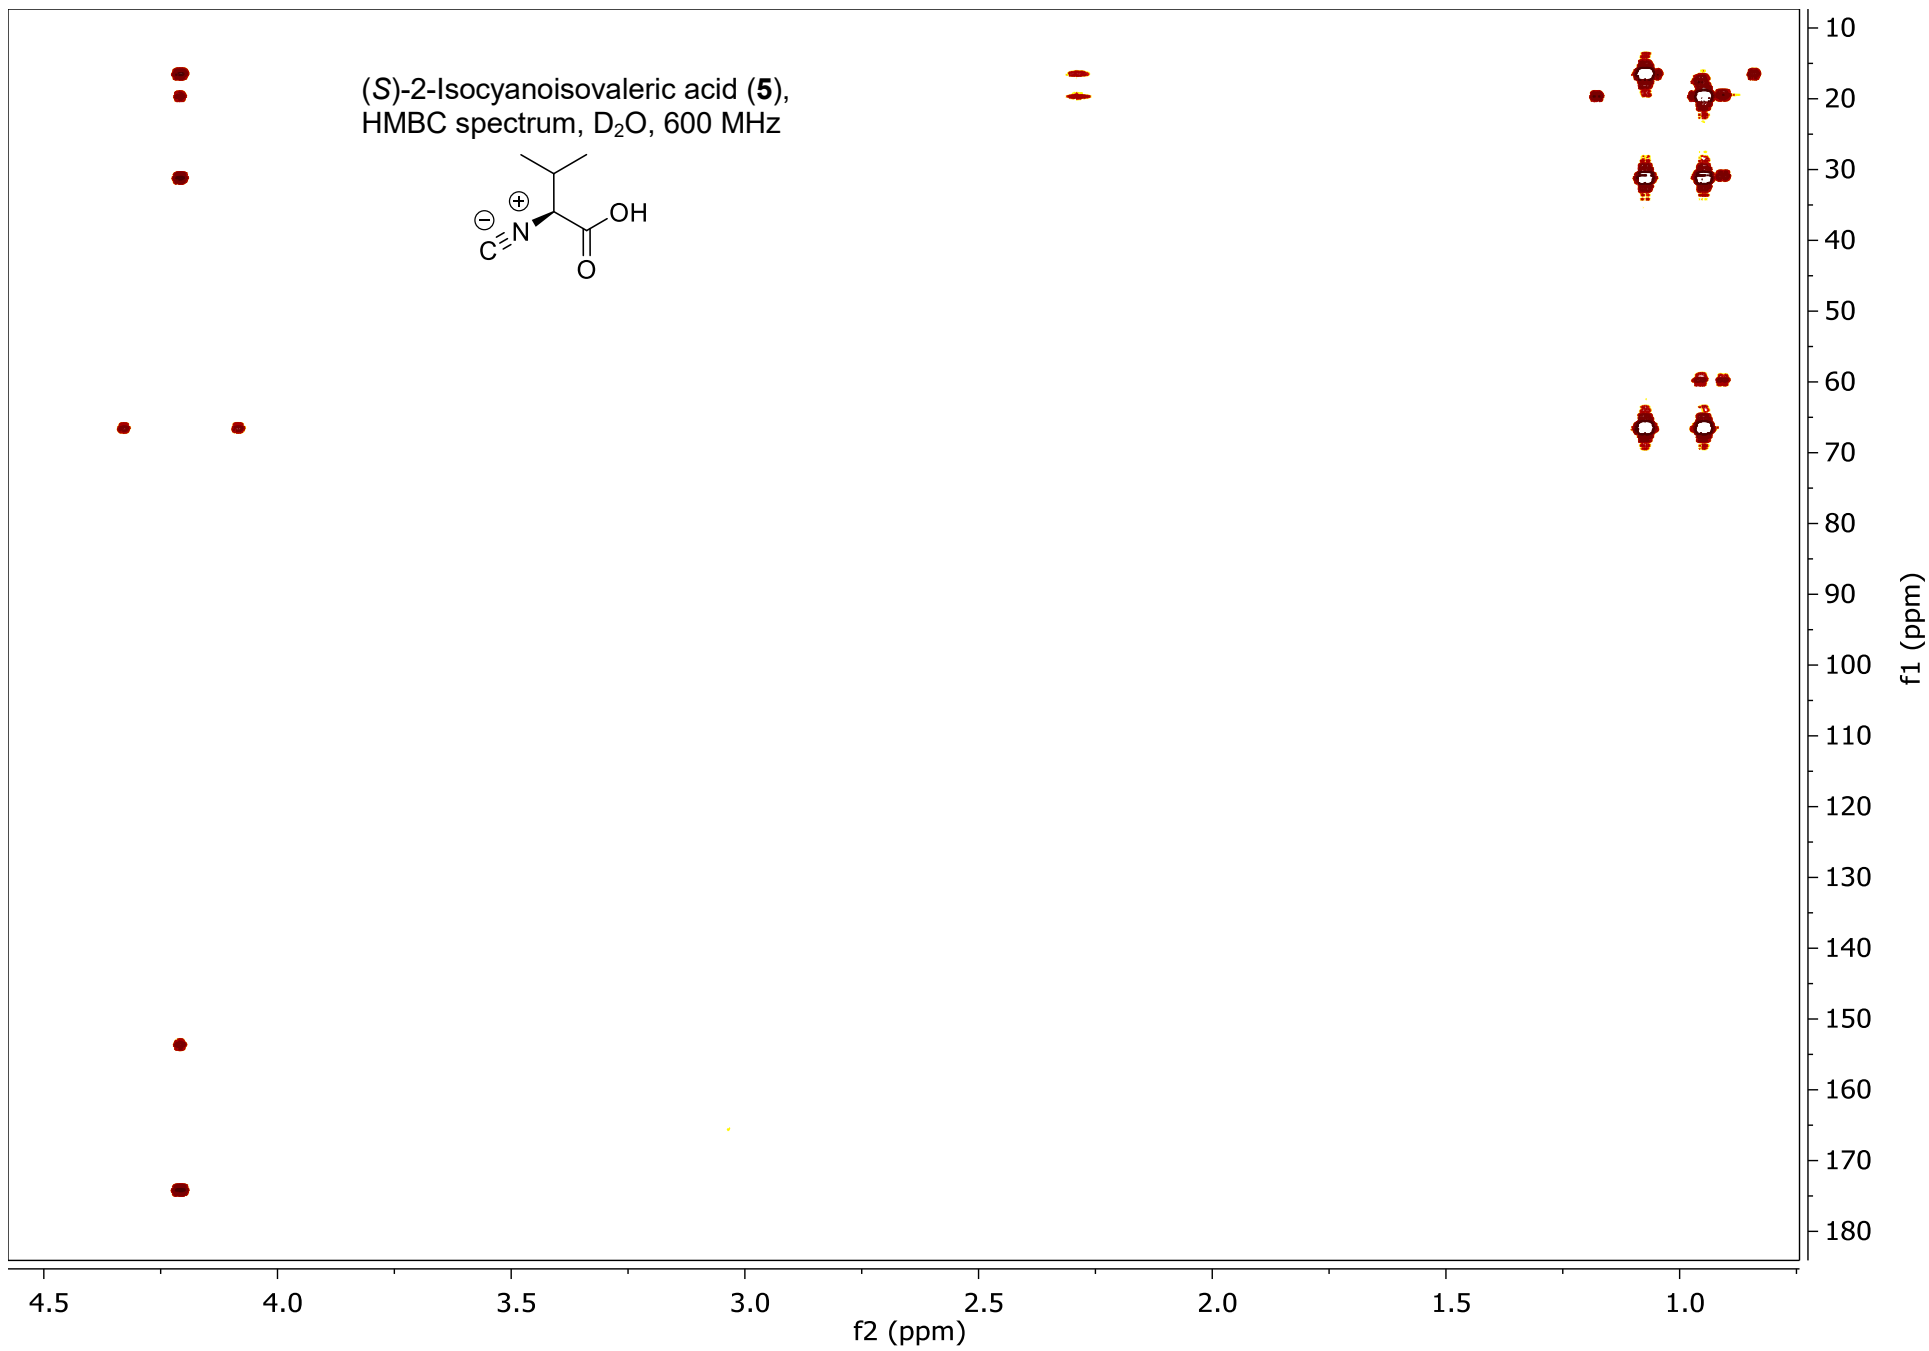

**<sup>1</sup>H (600 MHz) and <sup>13</sup>C (151 MHz) NMR spectroscopic data for heterocicolin C (12) in methanol-*d*<sub>4</sub>**

Chemical shifts were referenced to  $\delta(\text{CHD}_2\text{OD}) = 3.31$  and  $\delta(^{13}\text{C}\text{HD}_2\text{OD}) = 49.0$ . (<sup>1</sup>H, <sup>1</sup>H)-*J*-coupling constants were determined from the <sup>1</sup>H or dqfCOSY spectra. HMBC correlations are from the proton(s) stated to the indicated <sup>13</sup>C atom.

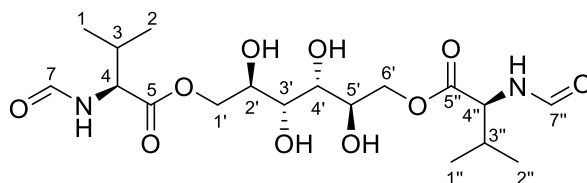

| No.   | $\delta_c$ | Proton   | $\delta_H$ ( $J_{HH}$ [Hz])                                        | HMBC           |
|-------|------------|----------|--------------------------------------------------------------------|----------------|
| 1/1'' | 18.0       | 1/1''-H  | 0.96 ( $J_{1,3} = 6.7$ Hz)                                         | 2, 3, 4        |
| 2/2'' | 19.5       | 3/3''-H  | 0.99 ( $J_{2,3} = 6.7$ Hz)                                         | 1, 3, 4        |
| 3/3'' | 31.9       | 3/3''-H  | 2.25 ( $J_{3,1} = 5.5$ Hz, $J_{3,2} = 6.7$ Hz, $J_{3,4} = 6.7$ Hz) | 1, 2, 4        |
| 4/4'' | 57.7       | 4/4''-H  | 4.51 ( $J_{4,3} = 5.5$ Hz)                                         | 1, 2, 3, 7     |
| 5/5'' | 172.7      |          |                                                                    | 1'/6'b, 3, 4   |
| 7/7'' | 163.8      | 7/7''-H  | 8.14                                                               | 4              |
| 1'/6' | 68.6       | 1'/6'-Ha | 4.47 ( $J_{1'a,1'b} = 11.5$ Hz)                                    | 3', 4'         |
|       |            | 1'/6'-Hb | 4.45 ( $J_{1'a,1'b} = 11.5$ Hz, $J_{1'a,2'} = 6.7$ Hz)             | 1, 2, 4        |
| 2'/5' | 70.3       | 2'/5'-H  | 3.89 ( $J_{3',2'} = 8.5$ Hz, $J_{2',1'b} = 6.7$ Hz)                | 1'/6'b, 3', 4' |
| 3'/4' | 70.5       | 3'/4'-H  | 3.81 ( $J_{3',2'} = 8.5$ Hz)                                       | 2', 5'         |



Heterocolin C (**12**),  $^1\text{H}$  NMR spectrum,  
Methanol- $d_4$ , 600 MHz

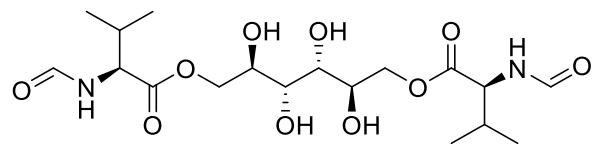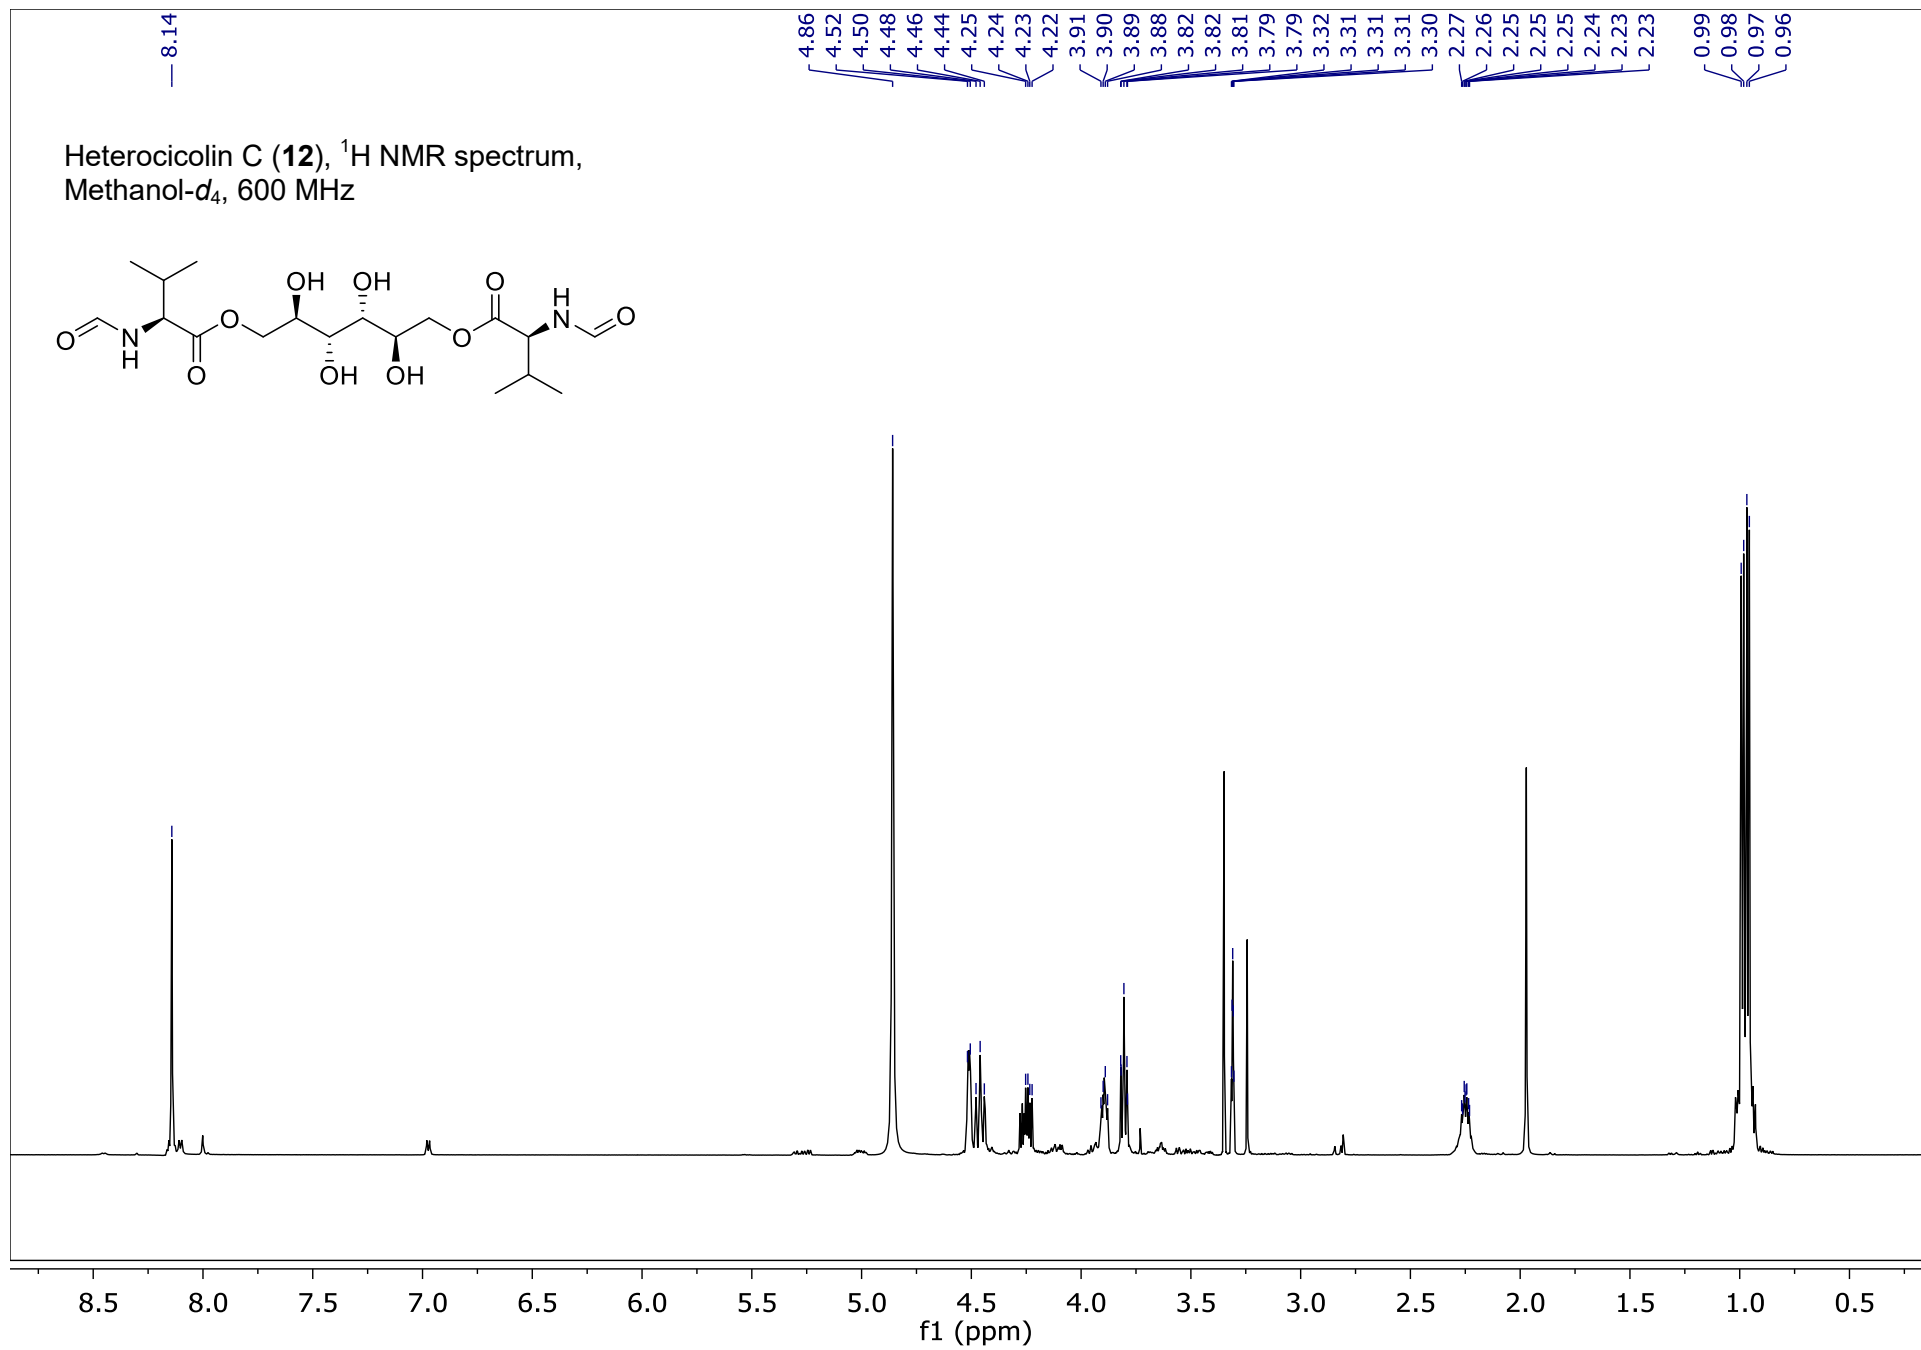

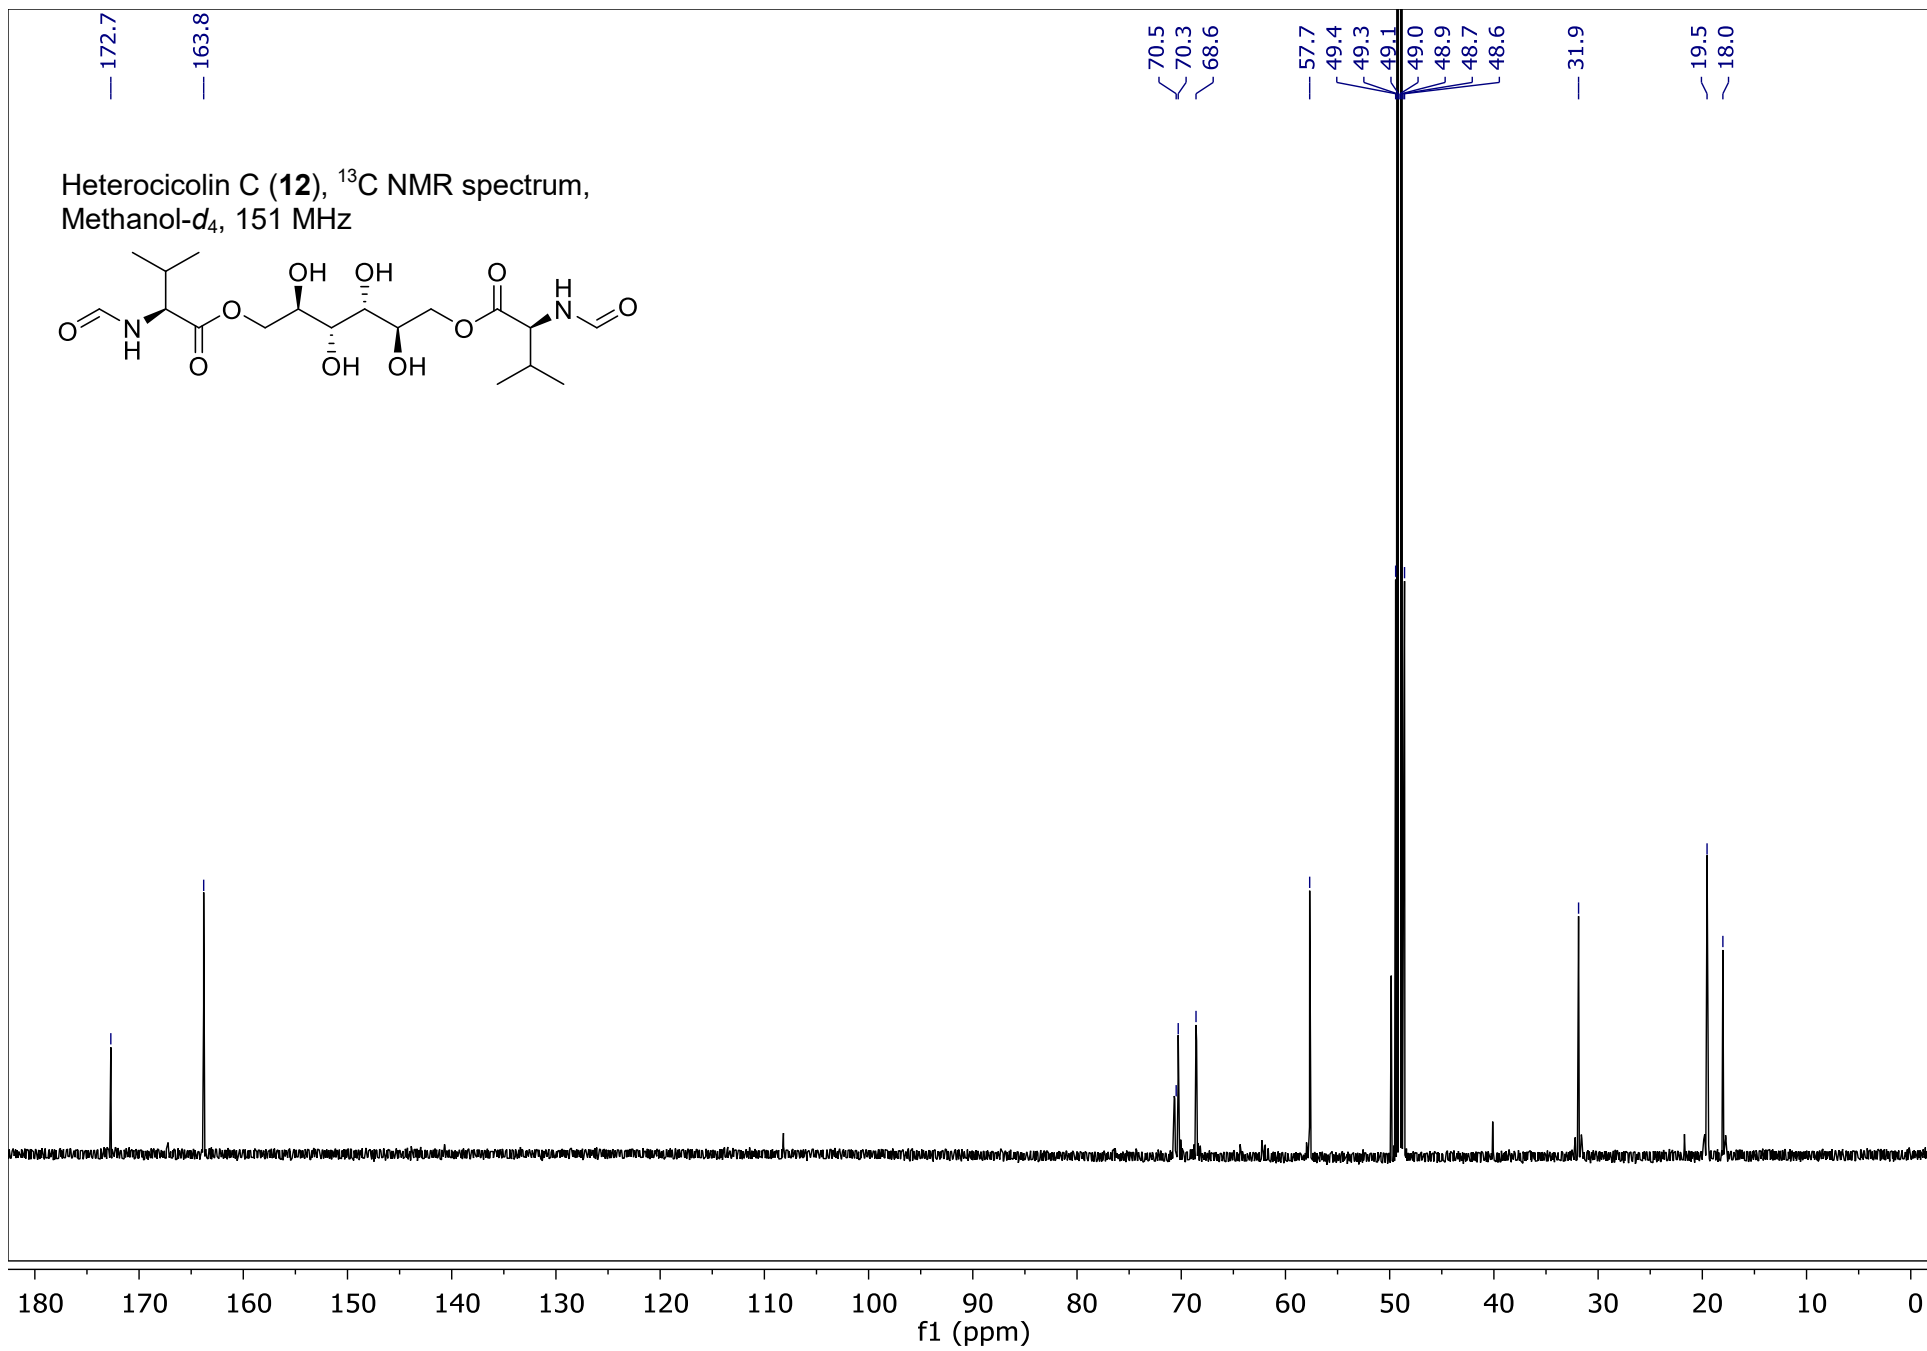

Heterocicolin C (**12**), dqfCOSY spectrum,  
Methanol-*d*<sub>4</sub>, 600 MHz

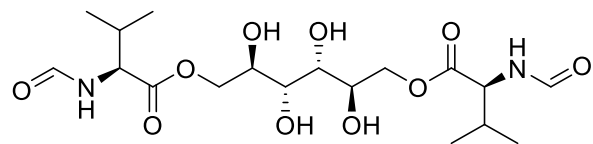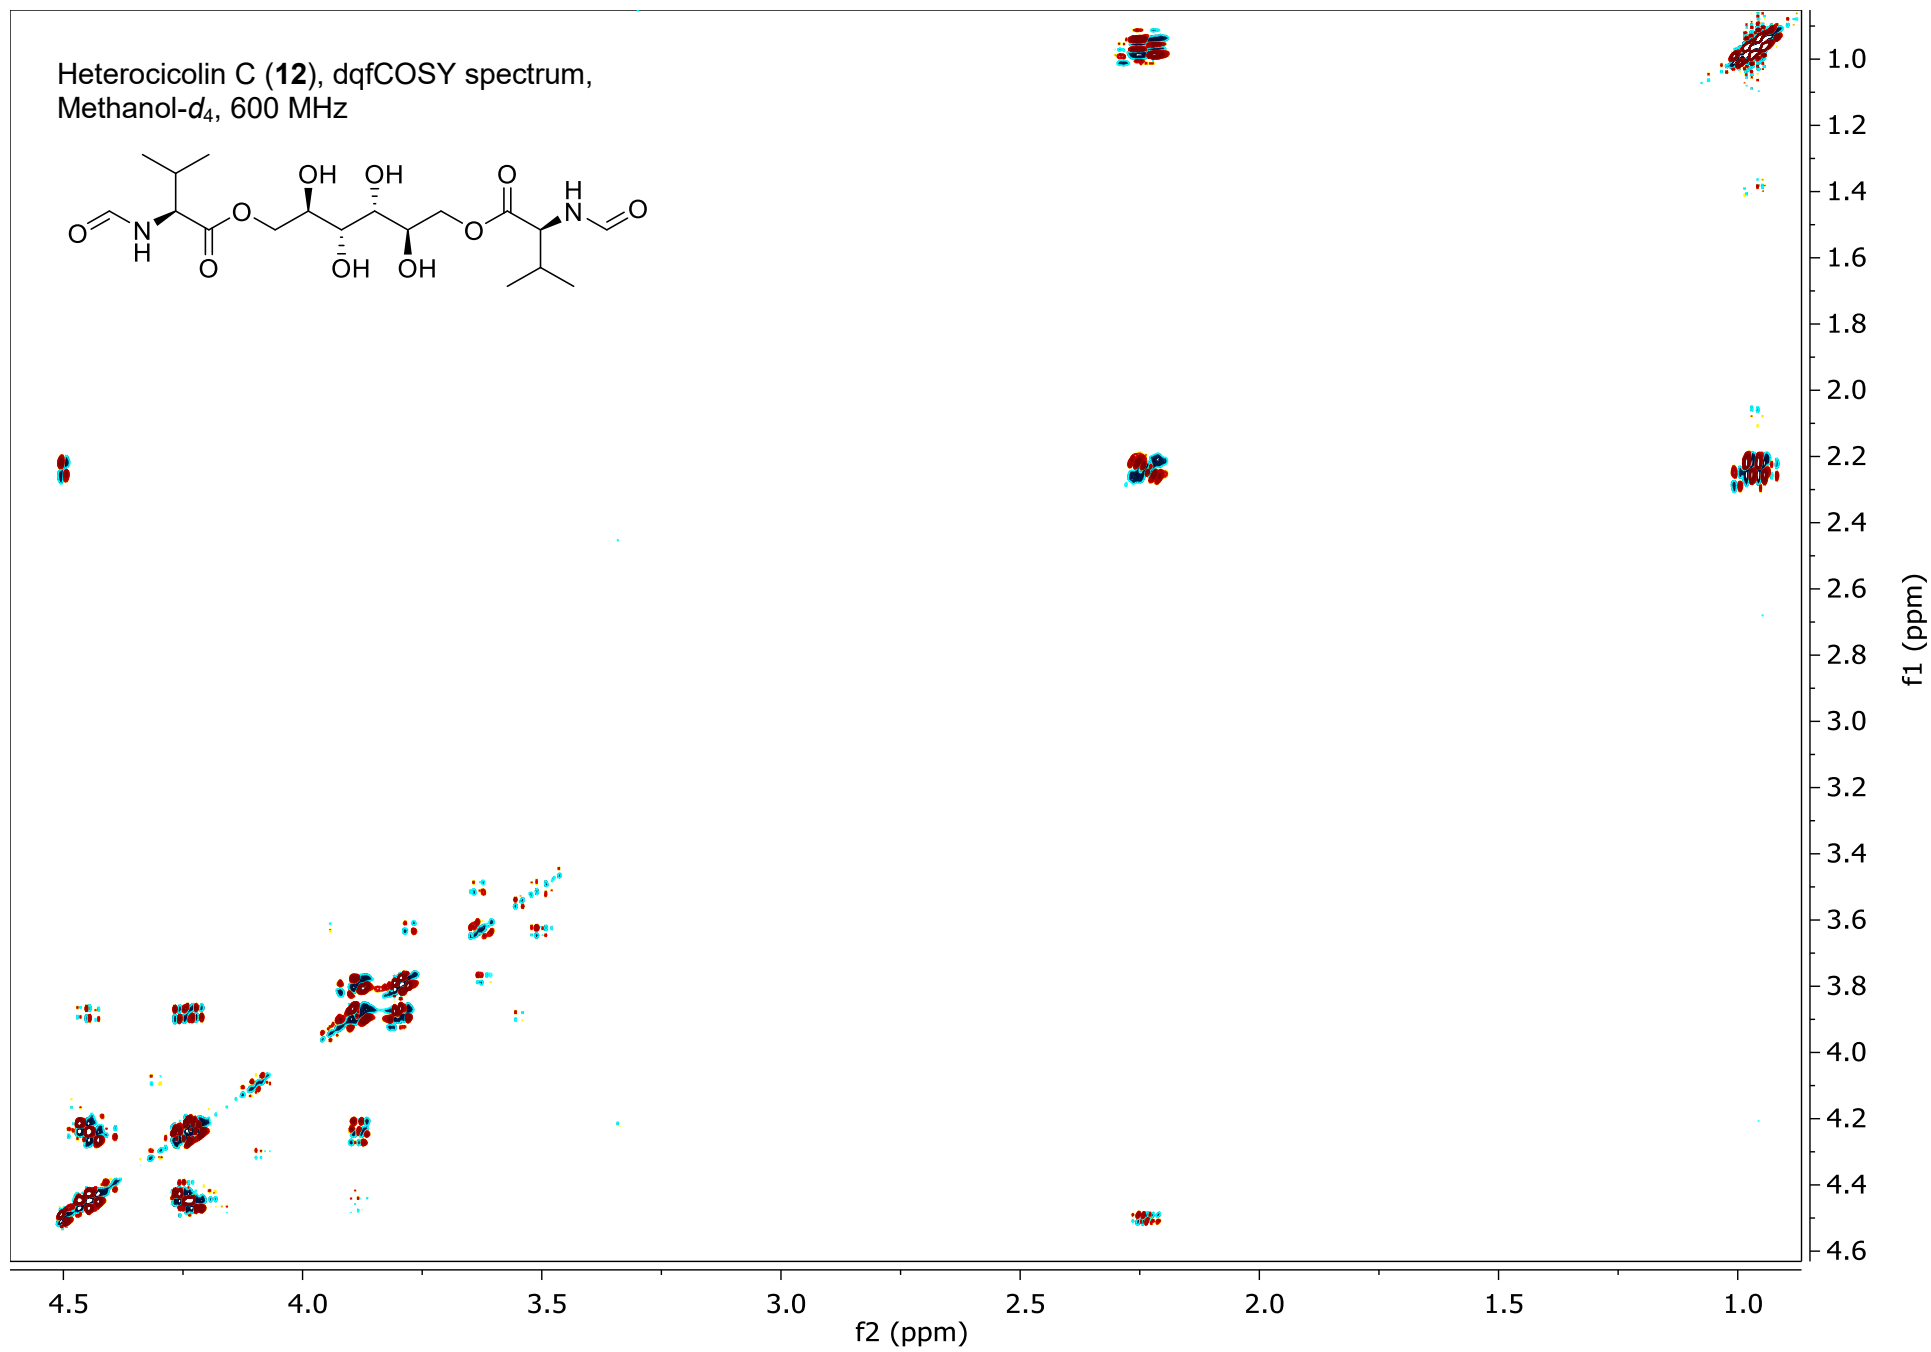

Heterocicolin C (**12**), coupled HSQC spectrum,  
Methanol-*d*<sub>4</sub>, 600 MHz

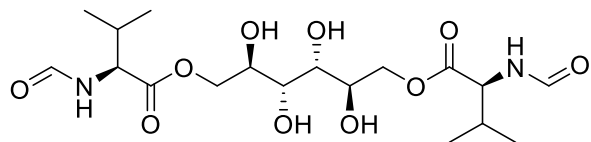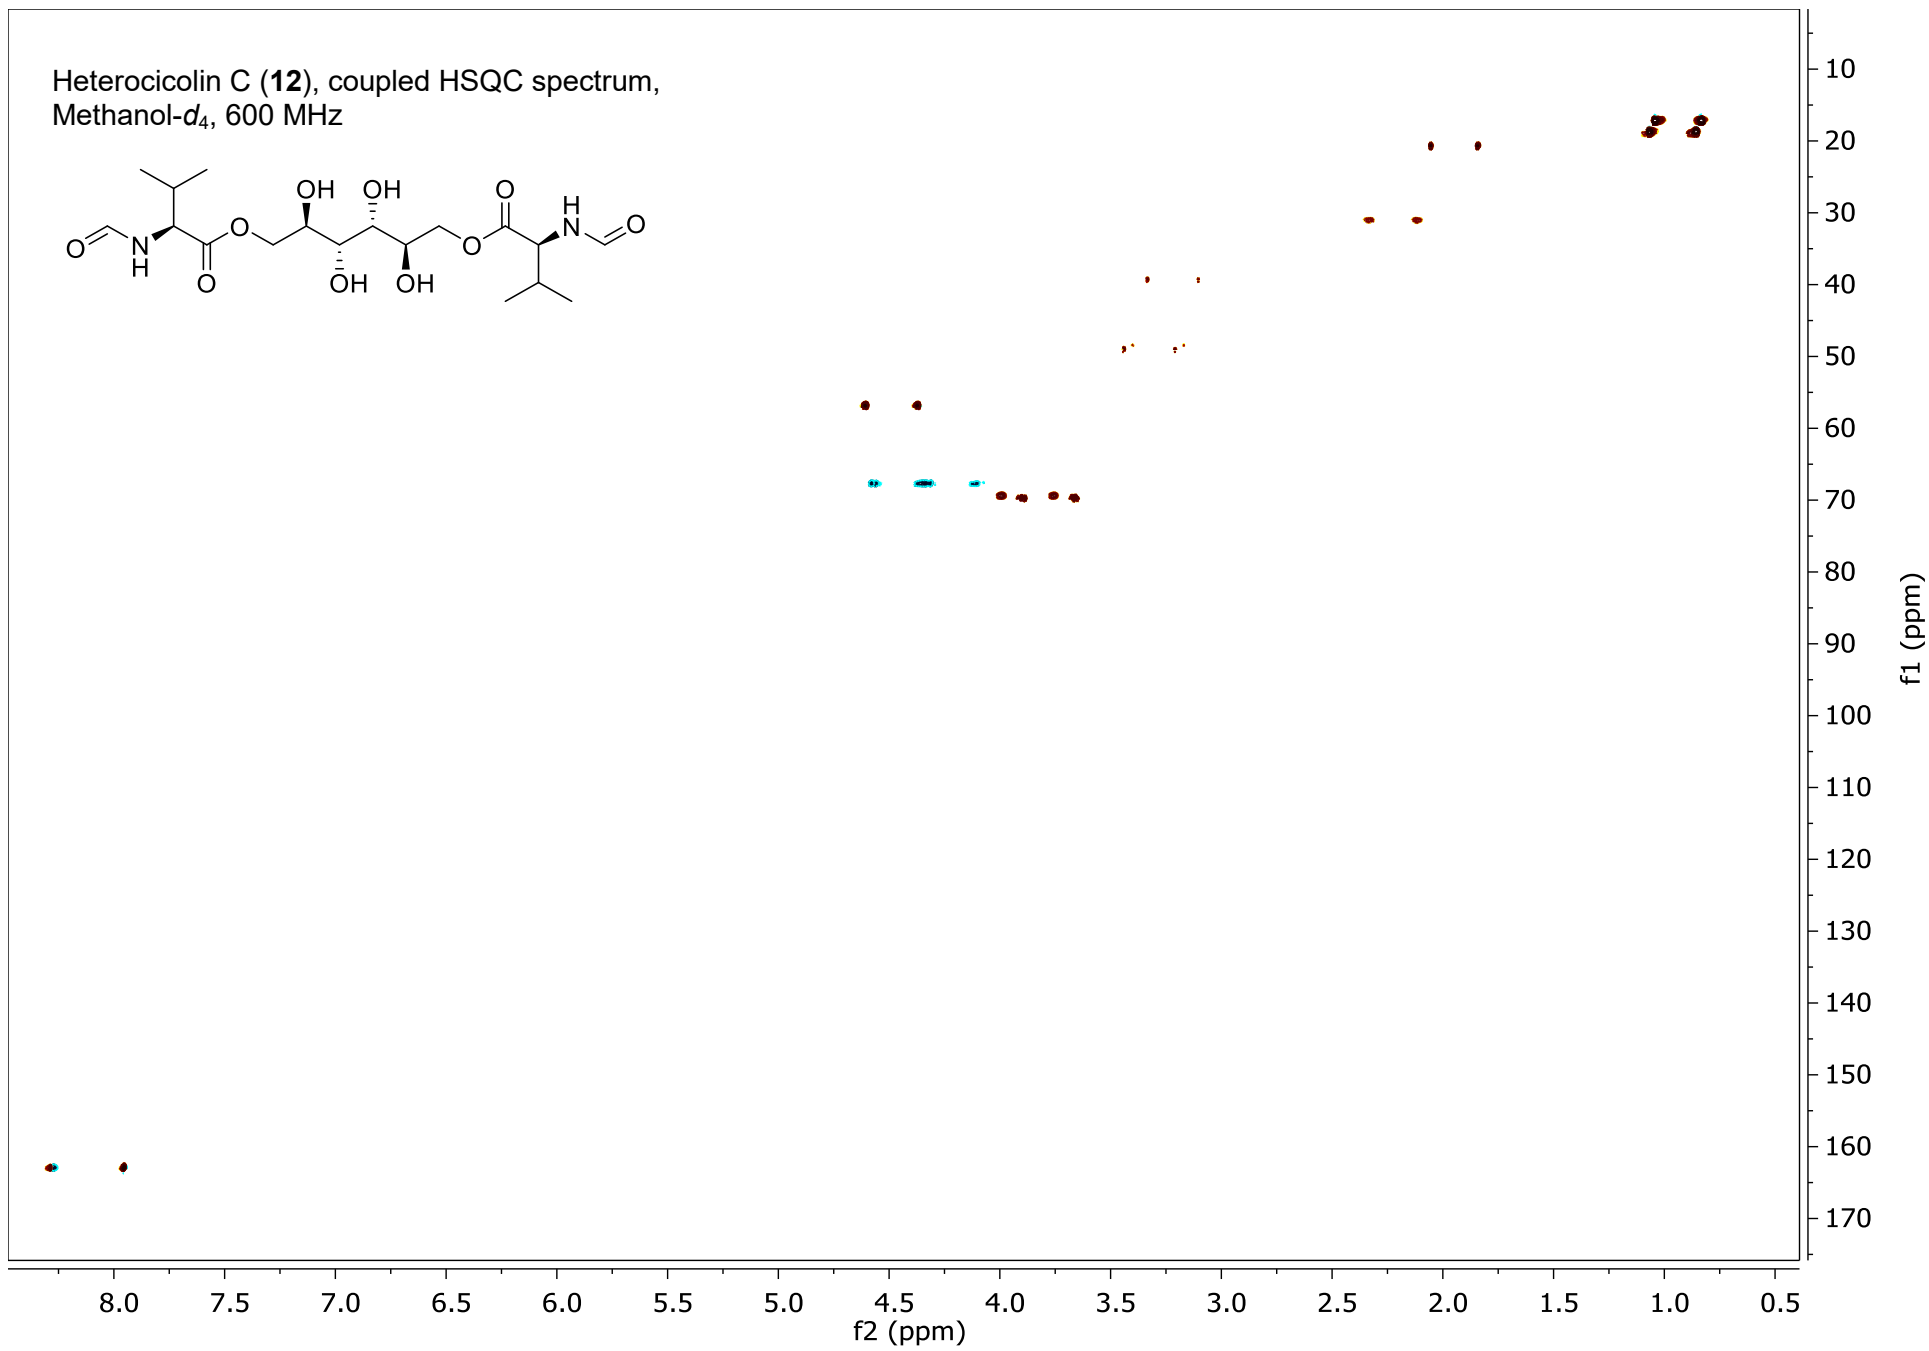

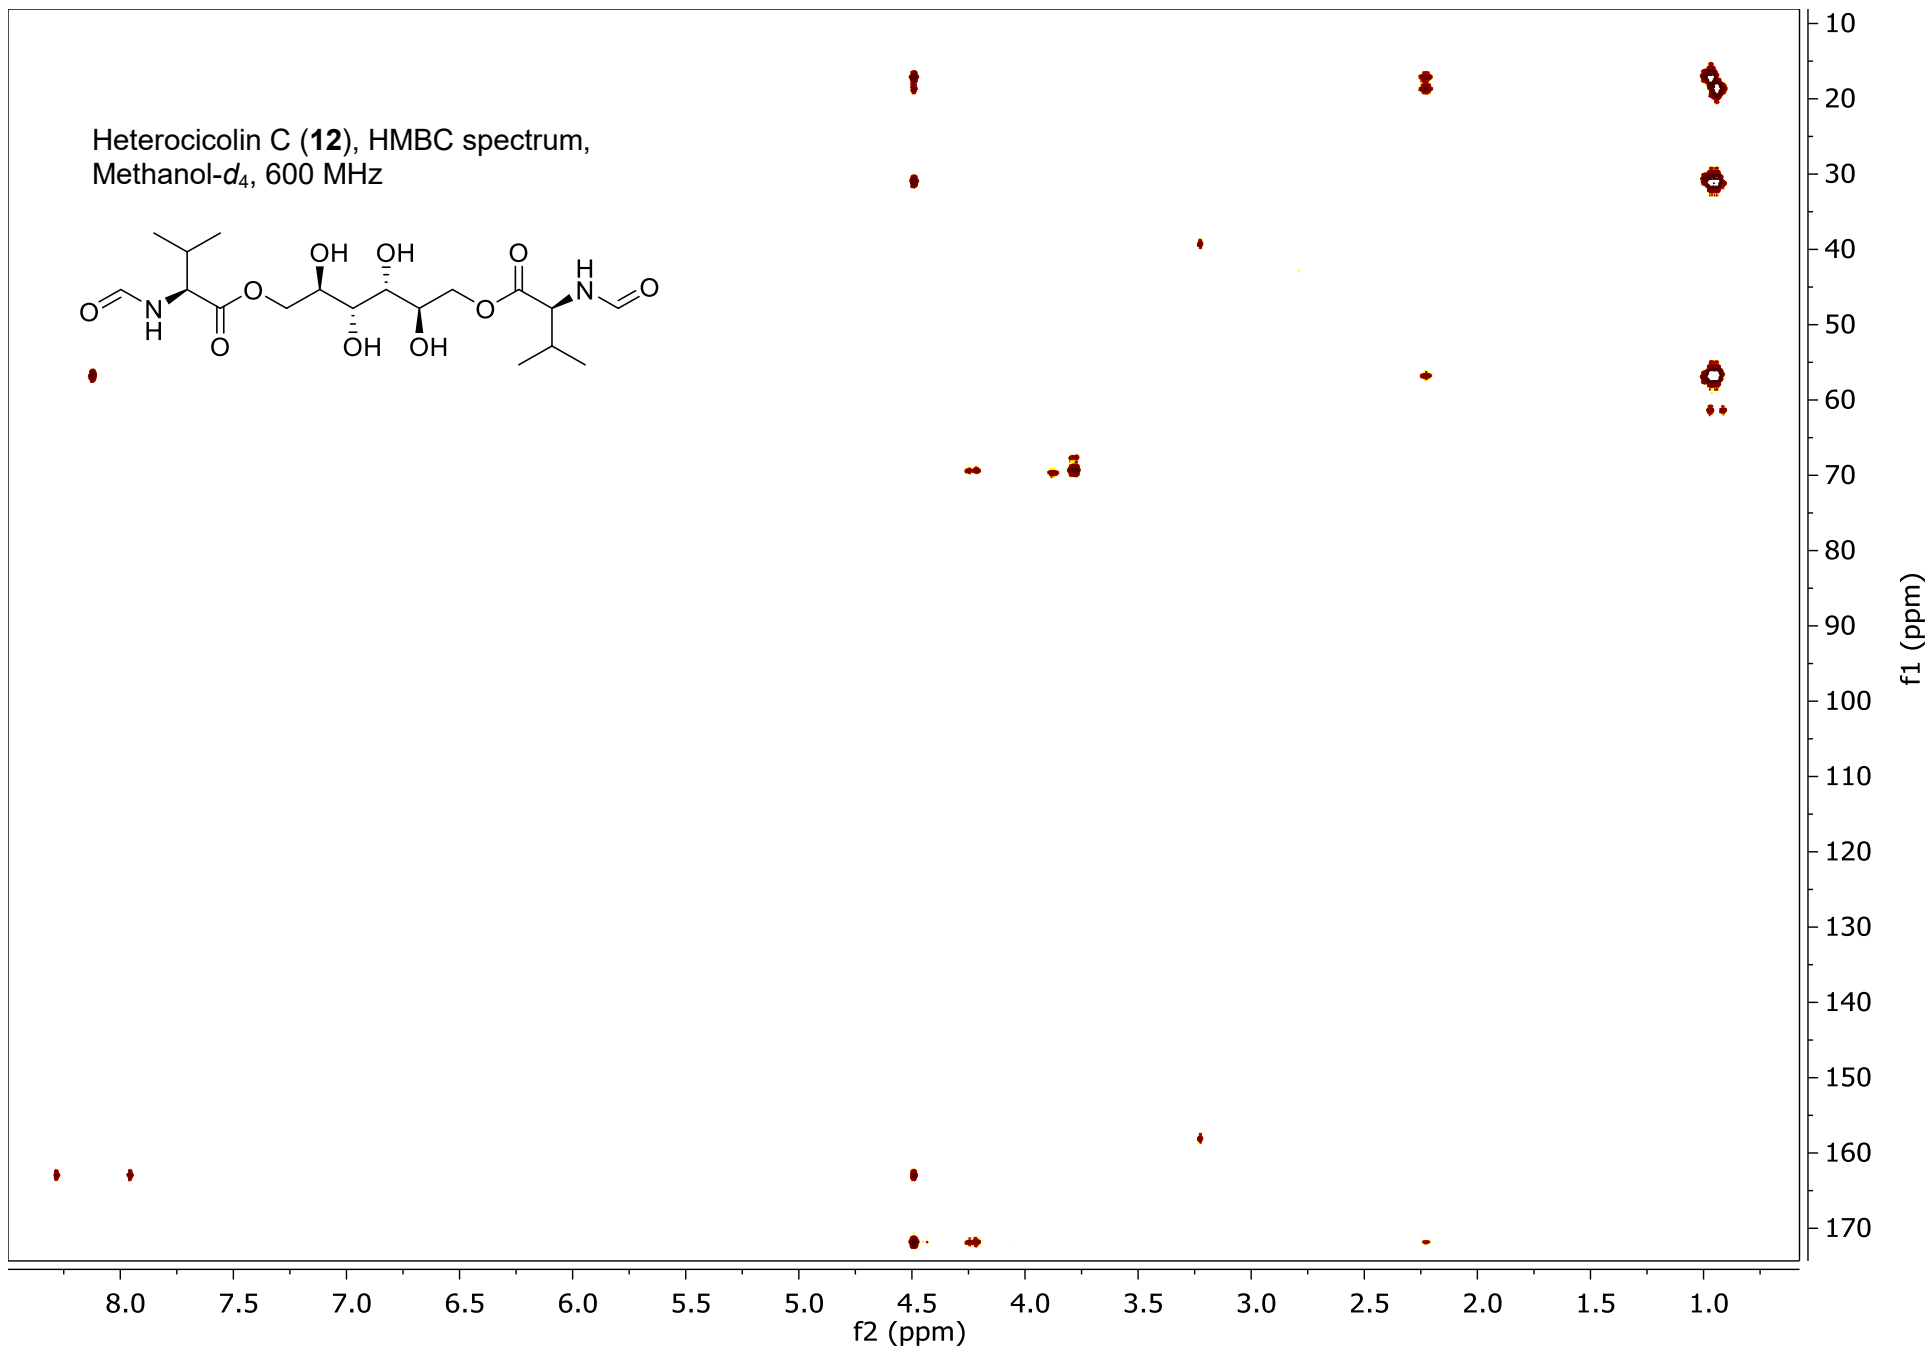

**<sup>1</sup>H (600 MHz) and <sup>13</sup>C (151 MHz) NMR spectroscopic data for heterocicolin E (14) in methanol-*d*<sub>4</sub>**

Chemical shifts were referenced to  $\delta(\text{CHD}_2\text{OD}) = 3.31$  and  $\delta(^{13}\text{C}\text{HD}_2\text{OD}) = 49.0$ . (<sup>1</sup>H,<sup>1</sup>H)-*J*-coupling constants were determined from the <sup>1</sup>H or dqfCOSY spectra. HMBC correlations are from the proton(s) stated to the indicated <sup>13</sup>C atom.

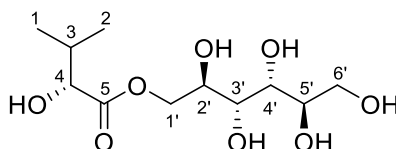

| No. | $\delta_c$ | Proton | $\delta_H$ ( $J_{HH}$ [Hz])                                                | HMBC            |
|-----|------------|--------|----------------------------------------------------------------------------|-----------------|
| 1   | 17.1       | 1-H    | 0.93 ( $J_{1,3} = 7.0$ Hz)                                                 | 2, 3, 4         |
| 2   | 19.2       | 2-H    | 1.00 ( $J_{2,3} = 7.0$ Hz)                                                 | 1, 3, 4         |
| 3   | 33.4       | 3-H    | 2.09 ( $J_{3,1} = 7.0$ Hz, $J_{3,2} = 7.0$ Hz, $J_{3,4} = 4.5$ Hz)         | 1, 2, 4         |
| 4   | 76.8       | 4-H    | 4.01 ( $J_{4,3} = 4.5$ Hz)                                                 | 1, 2, 3         |
| 5   | 175.6      |        |                                                                            | 4, 1'           |
| 1'  | 68.2       | 1'-Ha  | 4.45 ( $J_{1'a,1'b} = 11.5$ Hz, $J_{1'a,2'} = 3.0$ Hz)                     | 3'              |
|     |            | 1'-Hb  | 4.24 ( $J_{1'b,1'a} = 11.5$ Hz, $J_{1'b,2'} = 6.9$ Hz)                     |                 |
| 2'  | 70.4       | 2'-H   | 3.89 ( $J_{2',1'a} = 3.0$ Hz, $J_{2',1'b} = 6.9$ Hz, $J_{2',3'} = 9.0$ Hz) | 1'              |
| 3'  | 71.0       | 3'-H   | 3.78 (m)                                                                   | 1'b, 2', 4', 5' |
| 4'  | 71.0       | 1'-H   | 3.79 (m)                                                                   | 2', 3', 5', 6'  |
| 5'  | 73.0       | 2'-H   | 3.69 ( $J_{5',6'a} = 3.7$ Hz, $J_{5',6'b} = 6.4$ Hz, $J_{5',4'} = 6.4$ Hz) | 4', 6b'         |
| 6'  | 65.2       | 6'-Ha  | 3.81 ( $J_{6'a,6'b} = 11.5$ Hz, $J_{6'a,5'} = 3.7$ Hz)                     | 4', 5'          |
|     |            | 6'-Hb  | 3.64 ( $J_{6'b,6'a} = 11.5$ Hz, $J_{6'b,5'} = 6.4$ Hz)                     |                 |

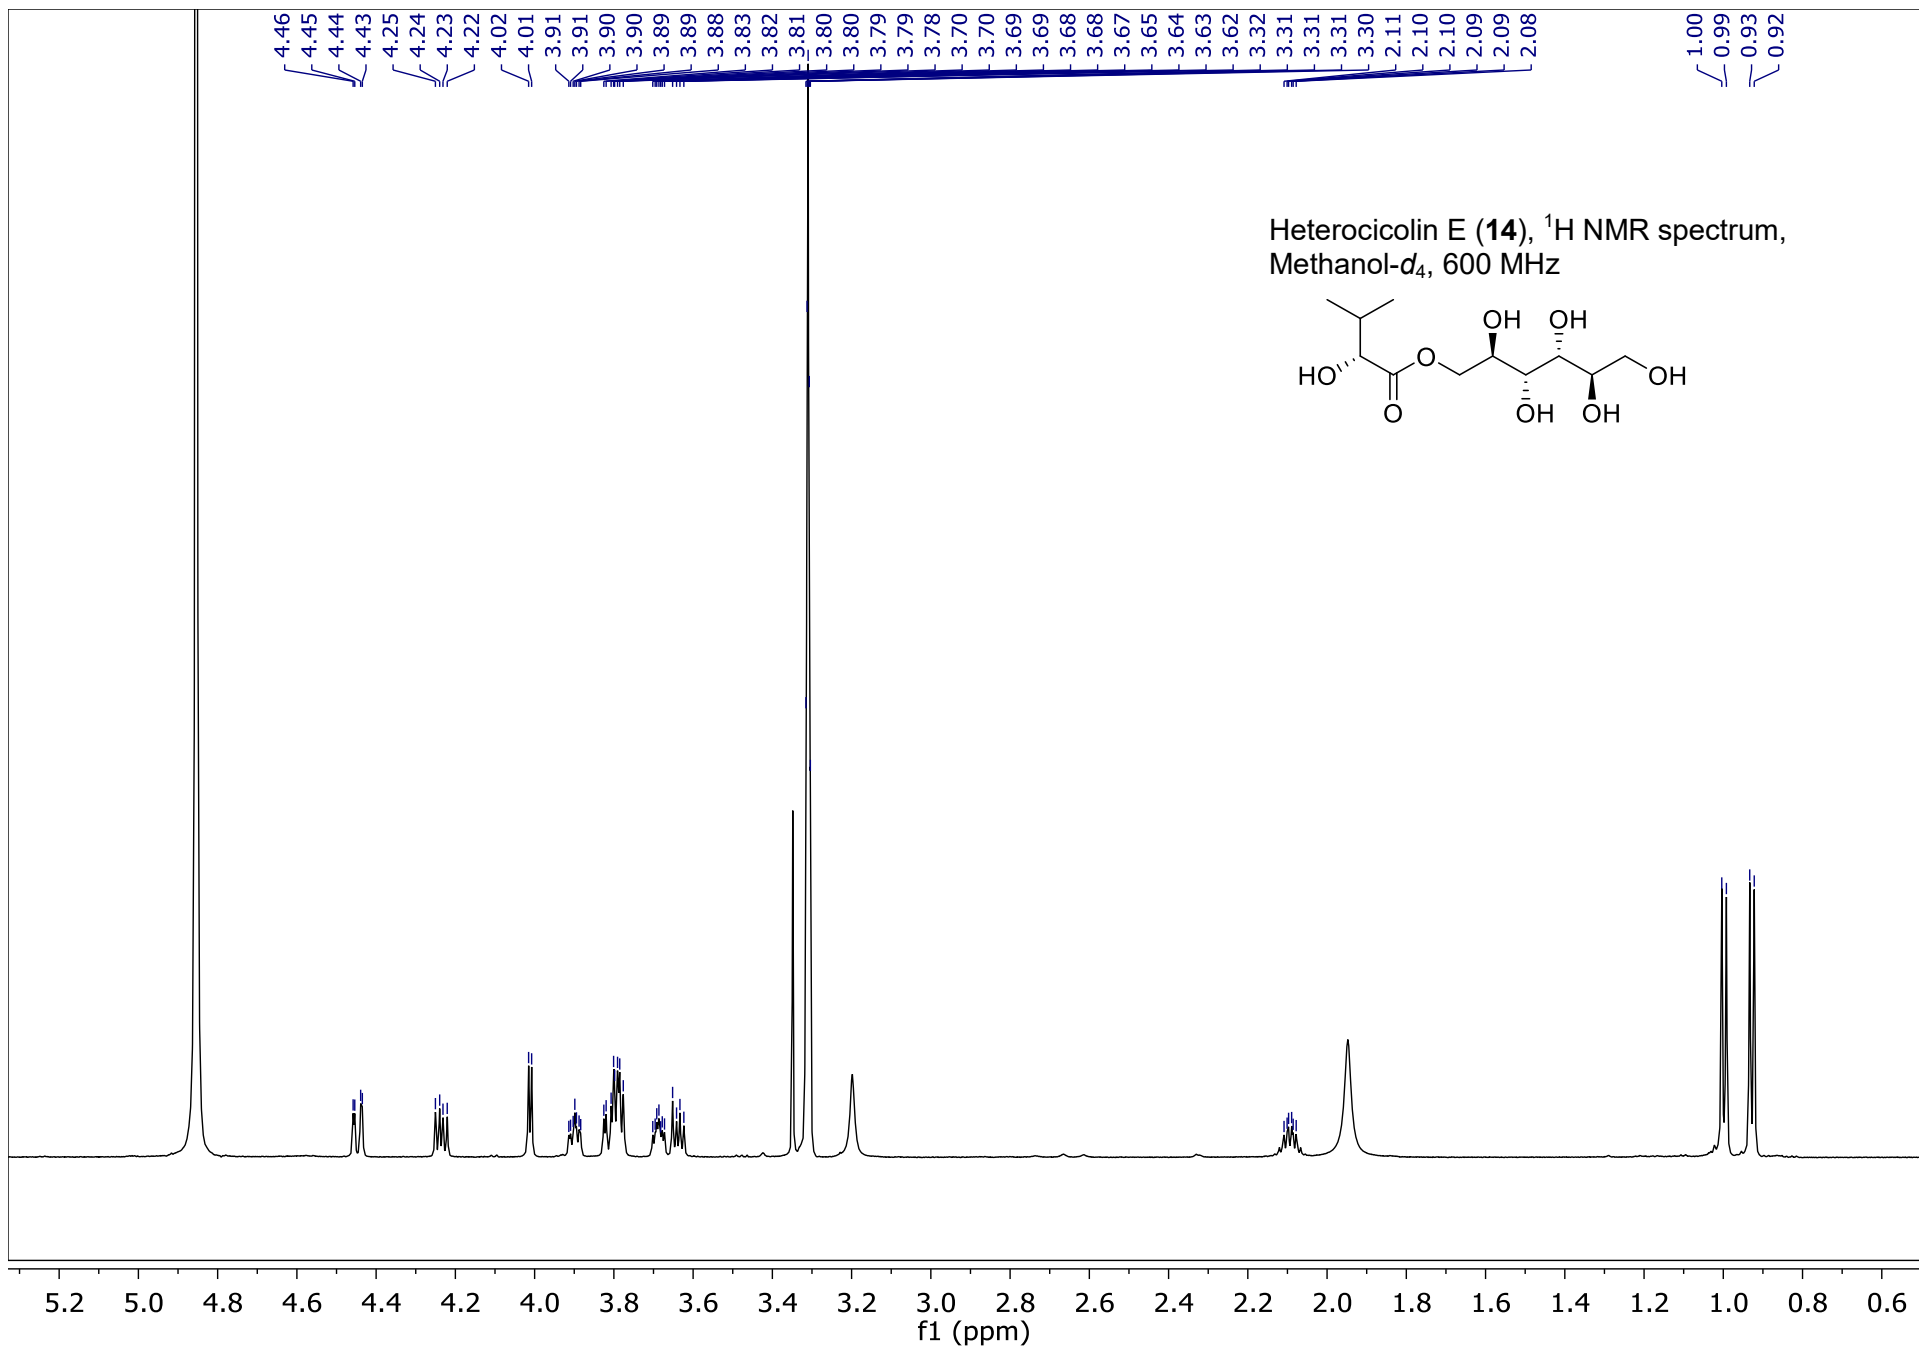

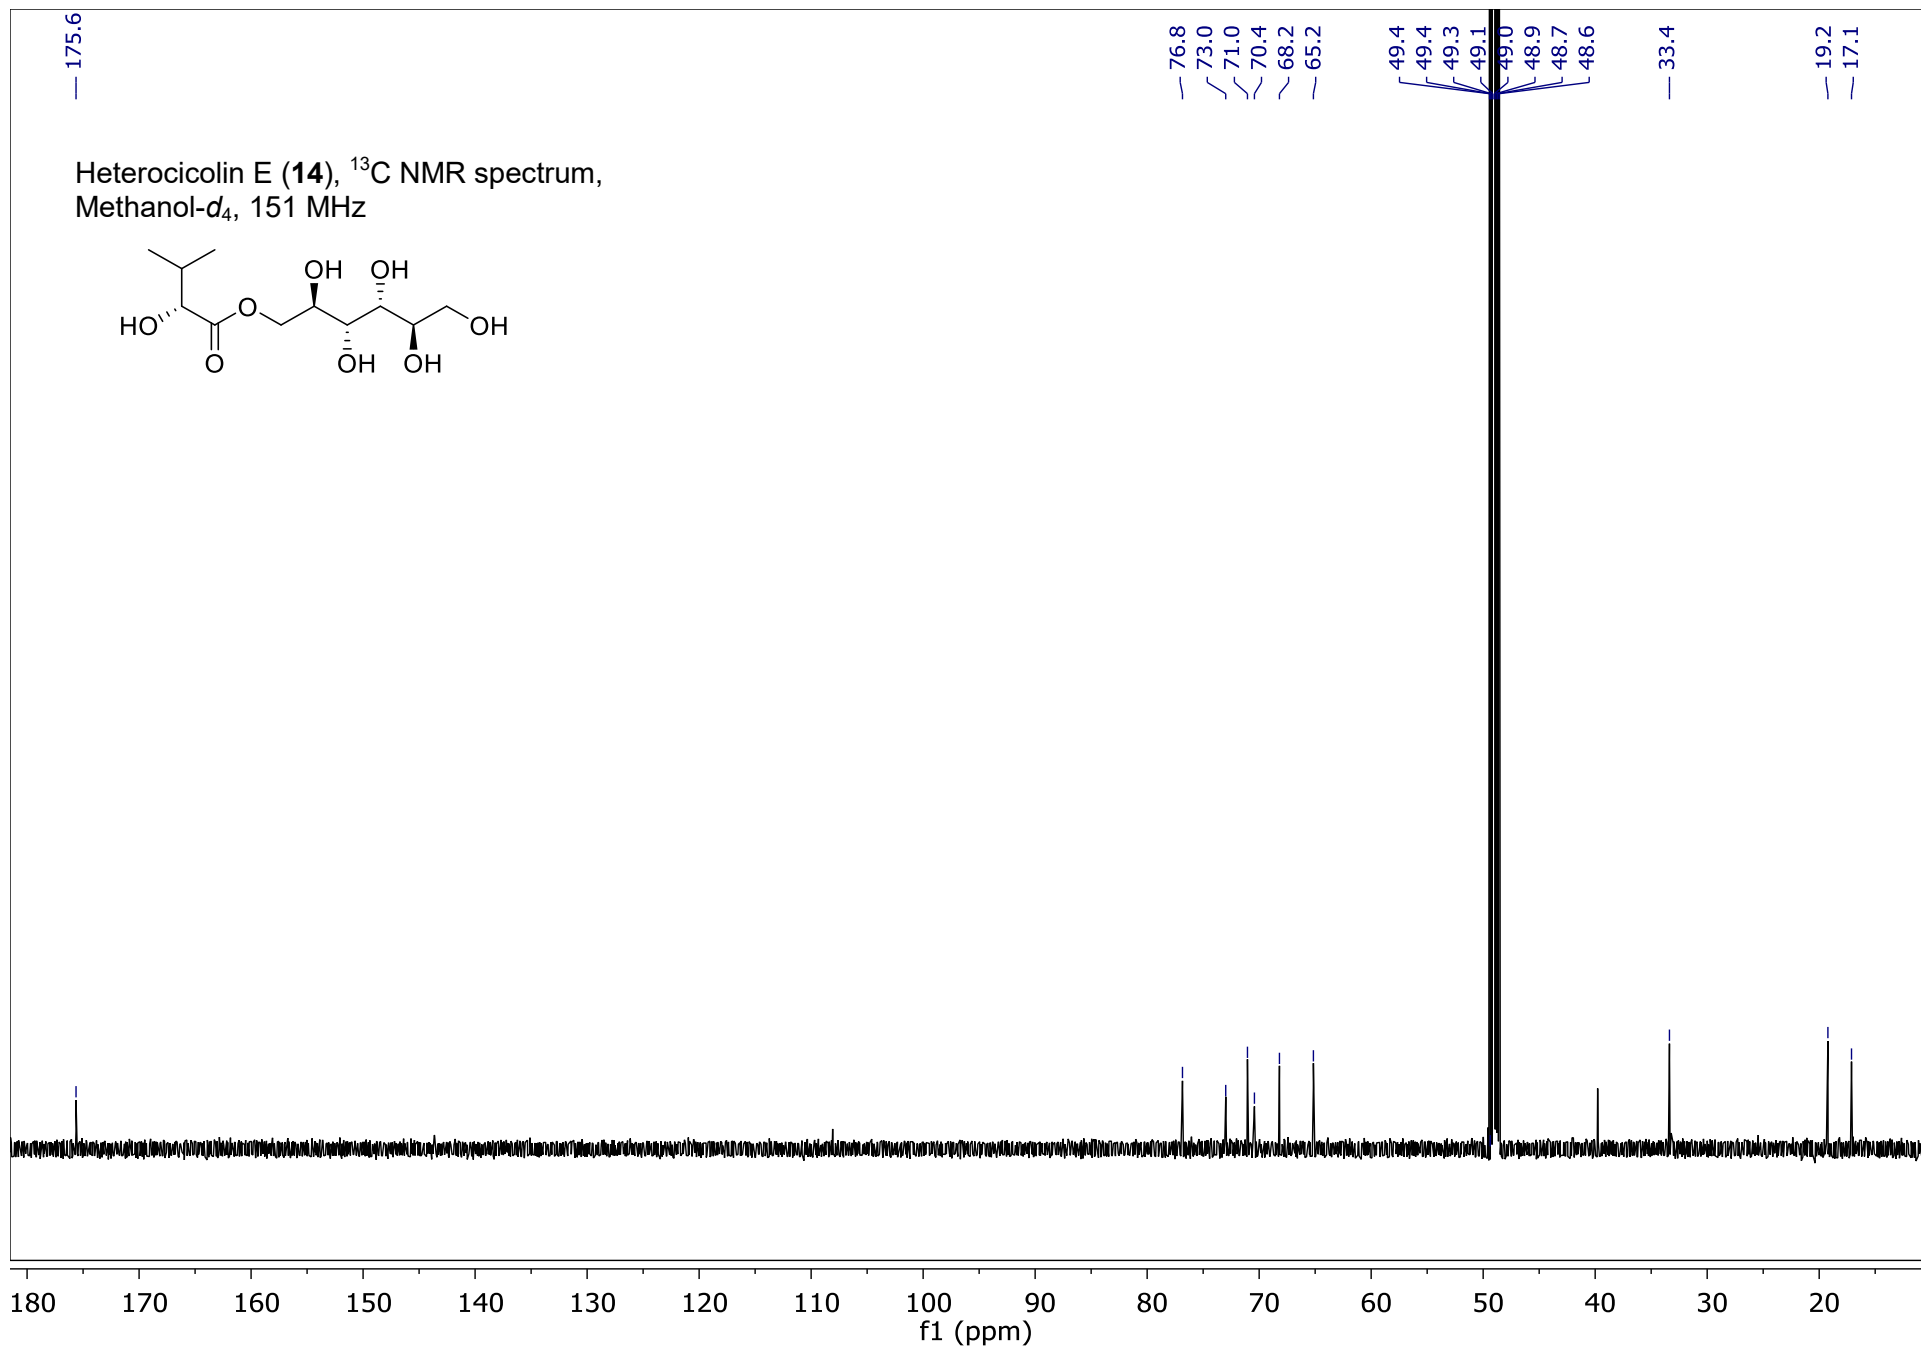



Heterocicolin E (14), dqfCOSY spectrum,  
Methanol-*d*<sub>4</sub>, 600 MHz

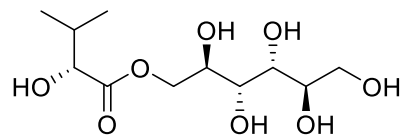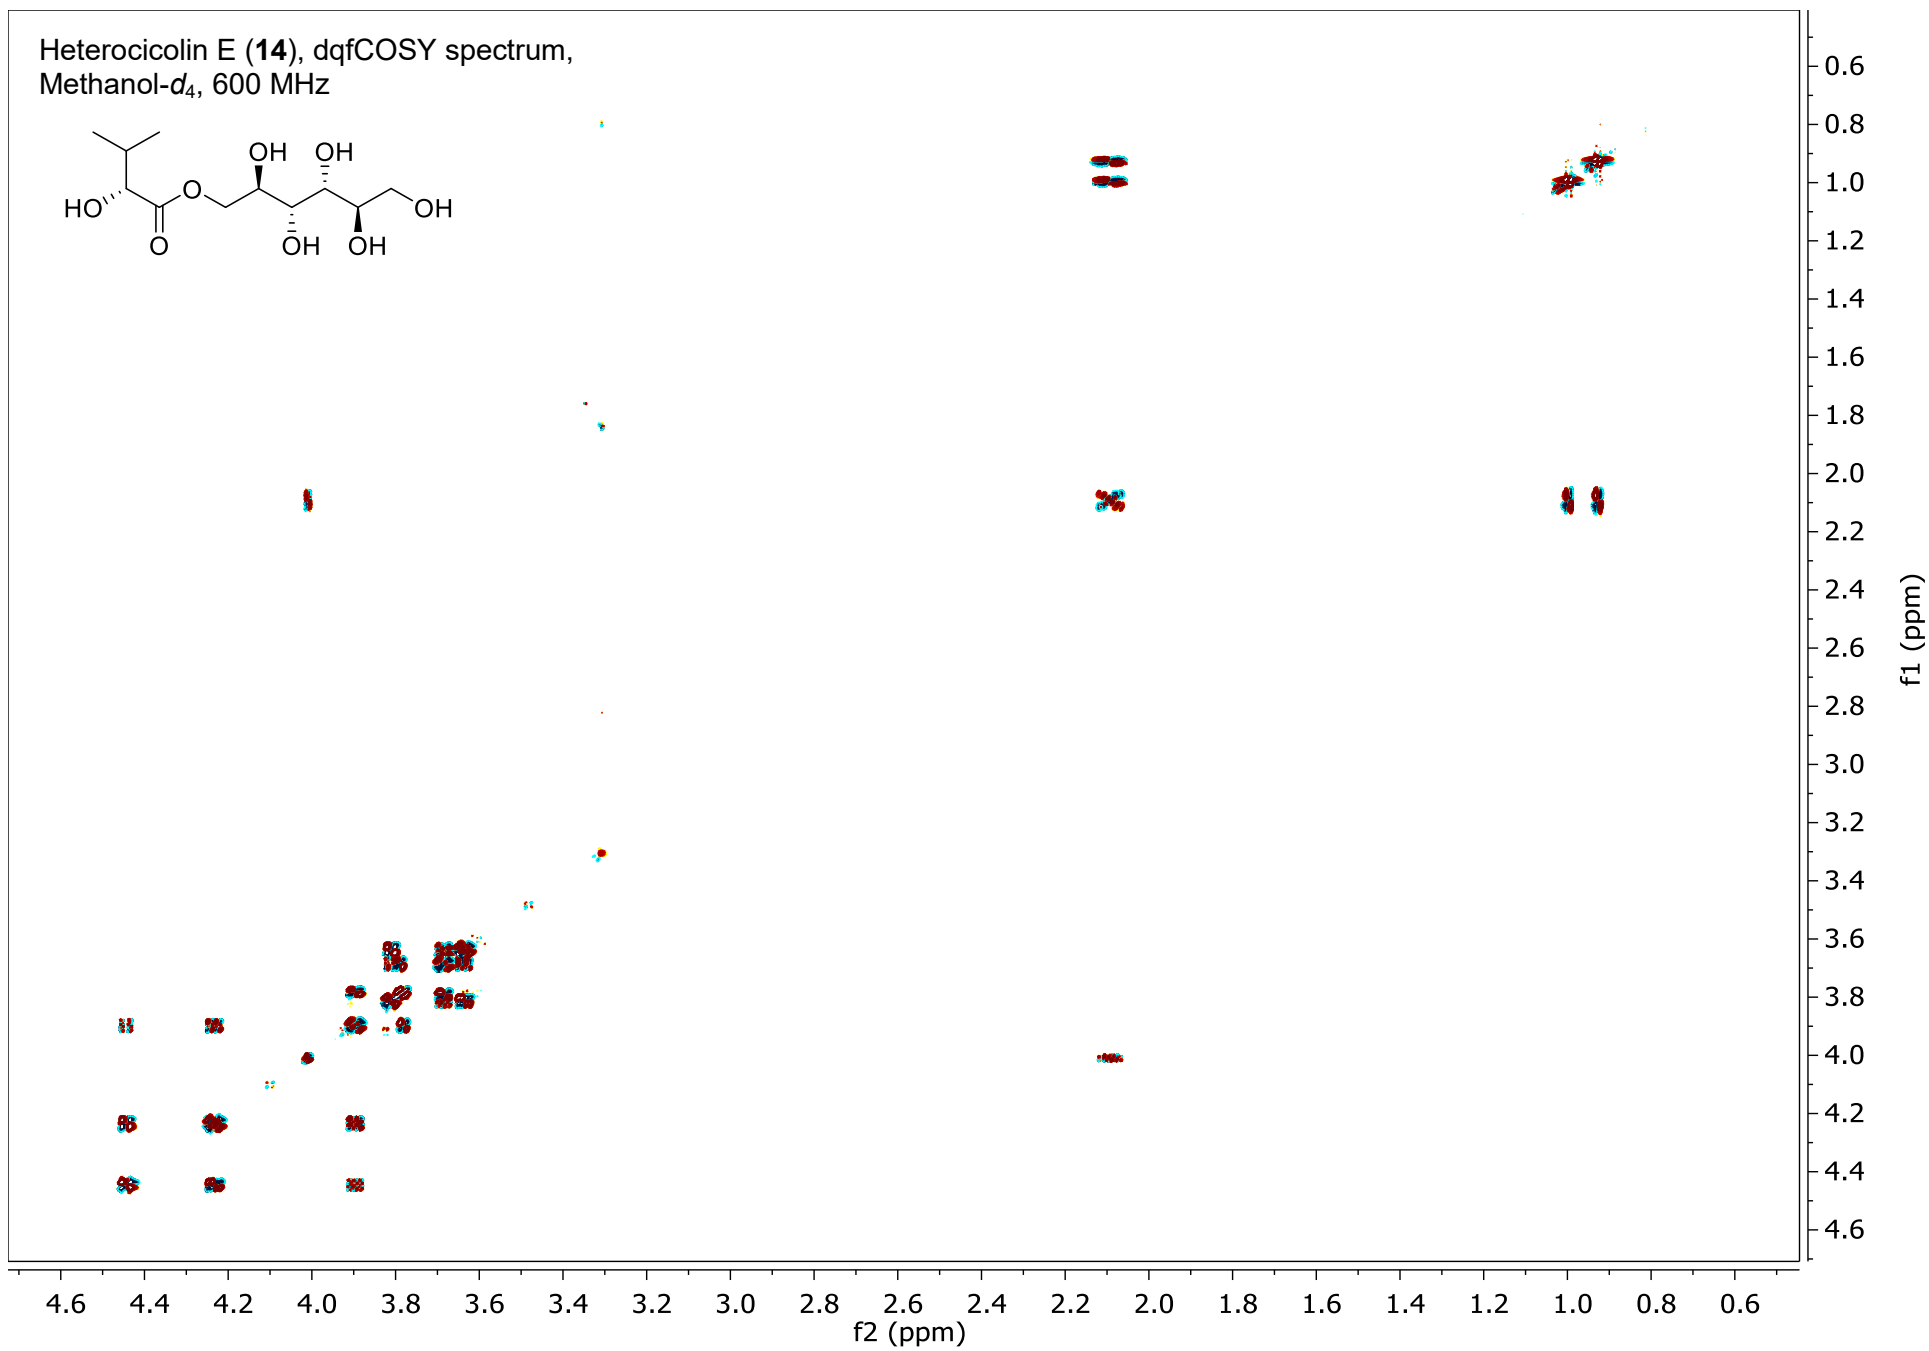

Heterocicolin E (**14**), coupled HSQC spectrum,  
Methanol-*d*<sub>4</sub>, 600 MHz

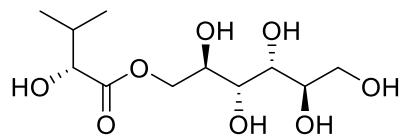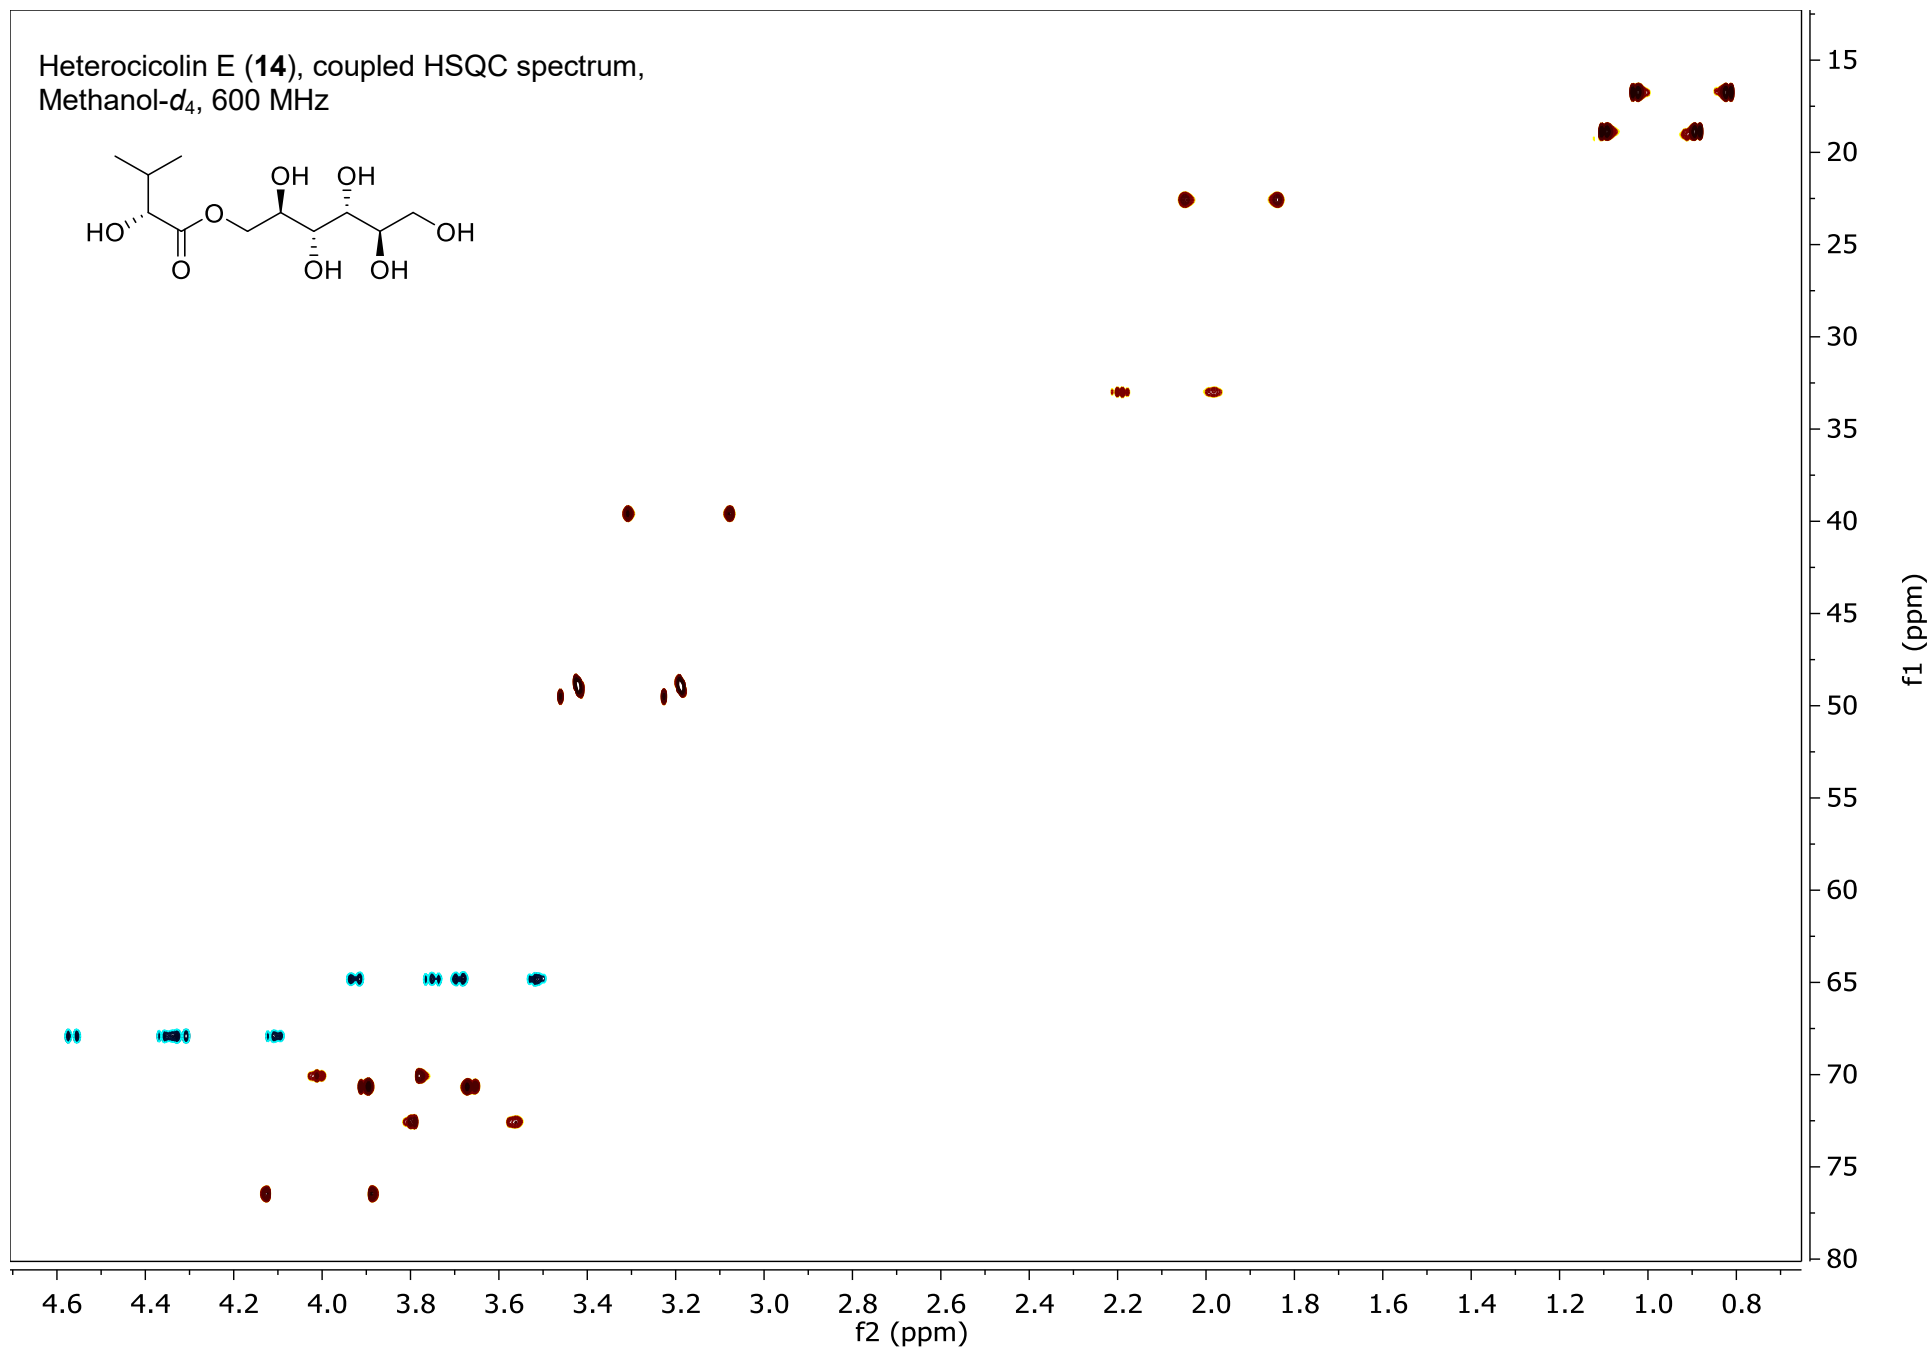

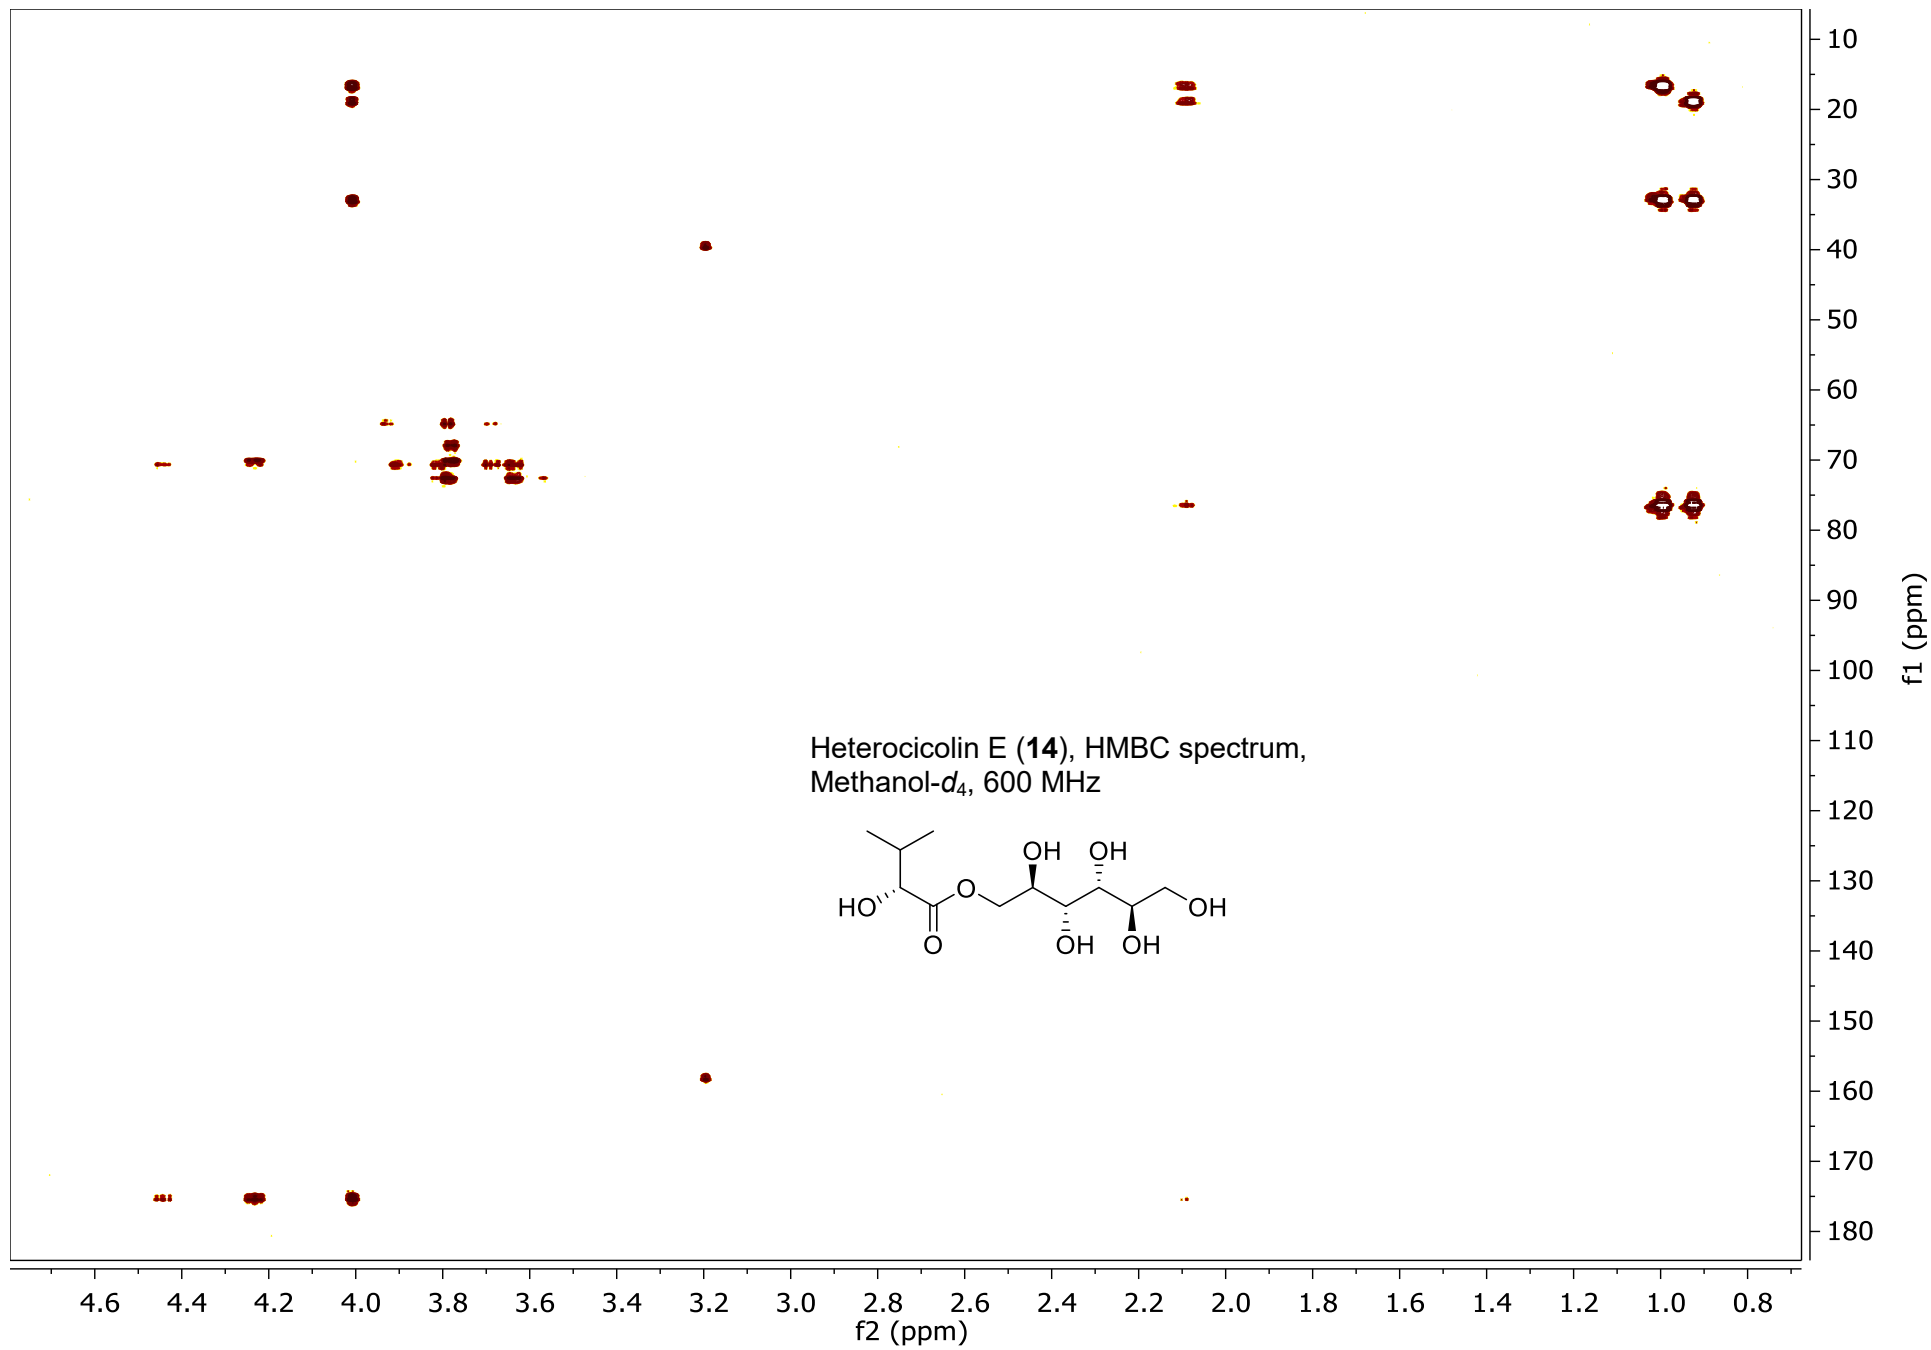

**<sup>1</sup>H (600 MHz) and <sup>13</sup>C (151 MHz) NMR spectroscopic data for heterocicolin F (15) in methanol-*d*<sub>4</sub>**

Chemical shifts were referenced to  $\delta(\text{CHD}_2\text{OD}) = 3.31$  and  $\delta(^{13}\text{CHD}_2\text{OD}) = 49.0$ . (<sup>1</sup>H,<sup>1</sup>H)-*J*-coupling constants were determined from the acquired <sup>1</sup>H or dqfCOSY spectra. HMBC correlations are from the proton(s) stated to the indicated <sup>13</sup>C atom.

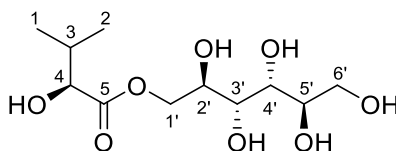

| No. | $\delta_c$ | Proton | $\delta_H$ ( $J_{HH}$ [Hz])                                                | HMBC            |
|-----|------------|--------|----------------------------------------------------------------------------|-----------------|
| 1   | 17.1       | 1-H    | 0.93 ( $J_{1,3} = 7.0$ Hz)                                                 | 2, 3, 4         |
| 2   | 19.2       | 2-H    | 1.00 ( $J_{2,3} = 7.0$ Hz)                                                 | 1, 3, 4         |
| 3   | 33.4       | 3-H    | 2.09 ( $J_{3,1} = 7.0$ Hz, $J_{3,2} = 7.0$ Hz, $J_{3,4} = 4.6$ Hz)         | 1, 2, 4         |
| 4   | 76.8       | 4-H    | 4.01 ( $J_{4,3} = 4.6$ Hz)                                                 | 1, 2, 3         |
| 5   | 175.6      |        |                                                                            | 4, 1'           |
| 1'  | 68.3       | 1'-Ha  | 4.46 ( $J_{1'a,1'b} = 11.5$ Hz, $J_{1'a,2'} = 3.0$ Hz)                     | 3'              |
|     |            | 1'-Hb  | 4.22 ( $J_{1'b,1'a} = 11.5$ Hz, $J_{1'b,2'} = 6.5$ Hz)                     |                 |
| 2'  | 70.5       | 2'-H   | 3.90 ( $J_{2',1'a} = 3.0$ Hz, $J_{2',1'b} = 6.5$ Hz, $J_{2',3'} = 9.0$ Hz) | 1'              |
| 3'  | 71.1       | 3'-H   | 3.78 (m)                                                                   | 1'b, 2', 4', 5' |
| 4'  | 71.0       | 1'-H   | 3.79 (m)                                                                   | 2', 3', 5', 6'  |
| 5'  | 73.0       | 2'-H   | 3.69 ( $J_{5',6'a} = 3.7$ Hz, $J_{5',6'b} = 6.0$ Hz, $J_{5',4'} = 8.5$ Hz) | 4', 6b'         |
| 6'  | 65.2       | 6'-Ha  | 3.81 ( $J_{6'a,6'b} = 11.2$ Hz, $J_{6'a,5'} = 3.7$ Hz)                     | 4', 5'          |
|     |            | 6'-Hb  | 3.64 ( $J_{6'b,6'a} = 11.2$ Hz, $J_{6'b,5'} = 6.0$ Hz)                     |                 |

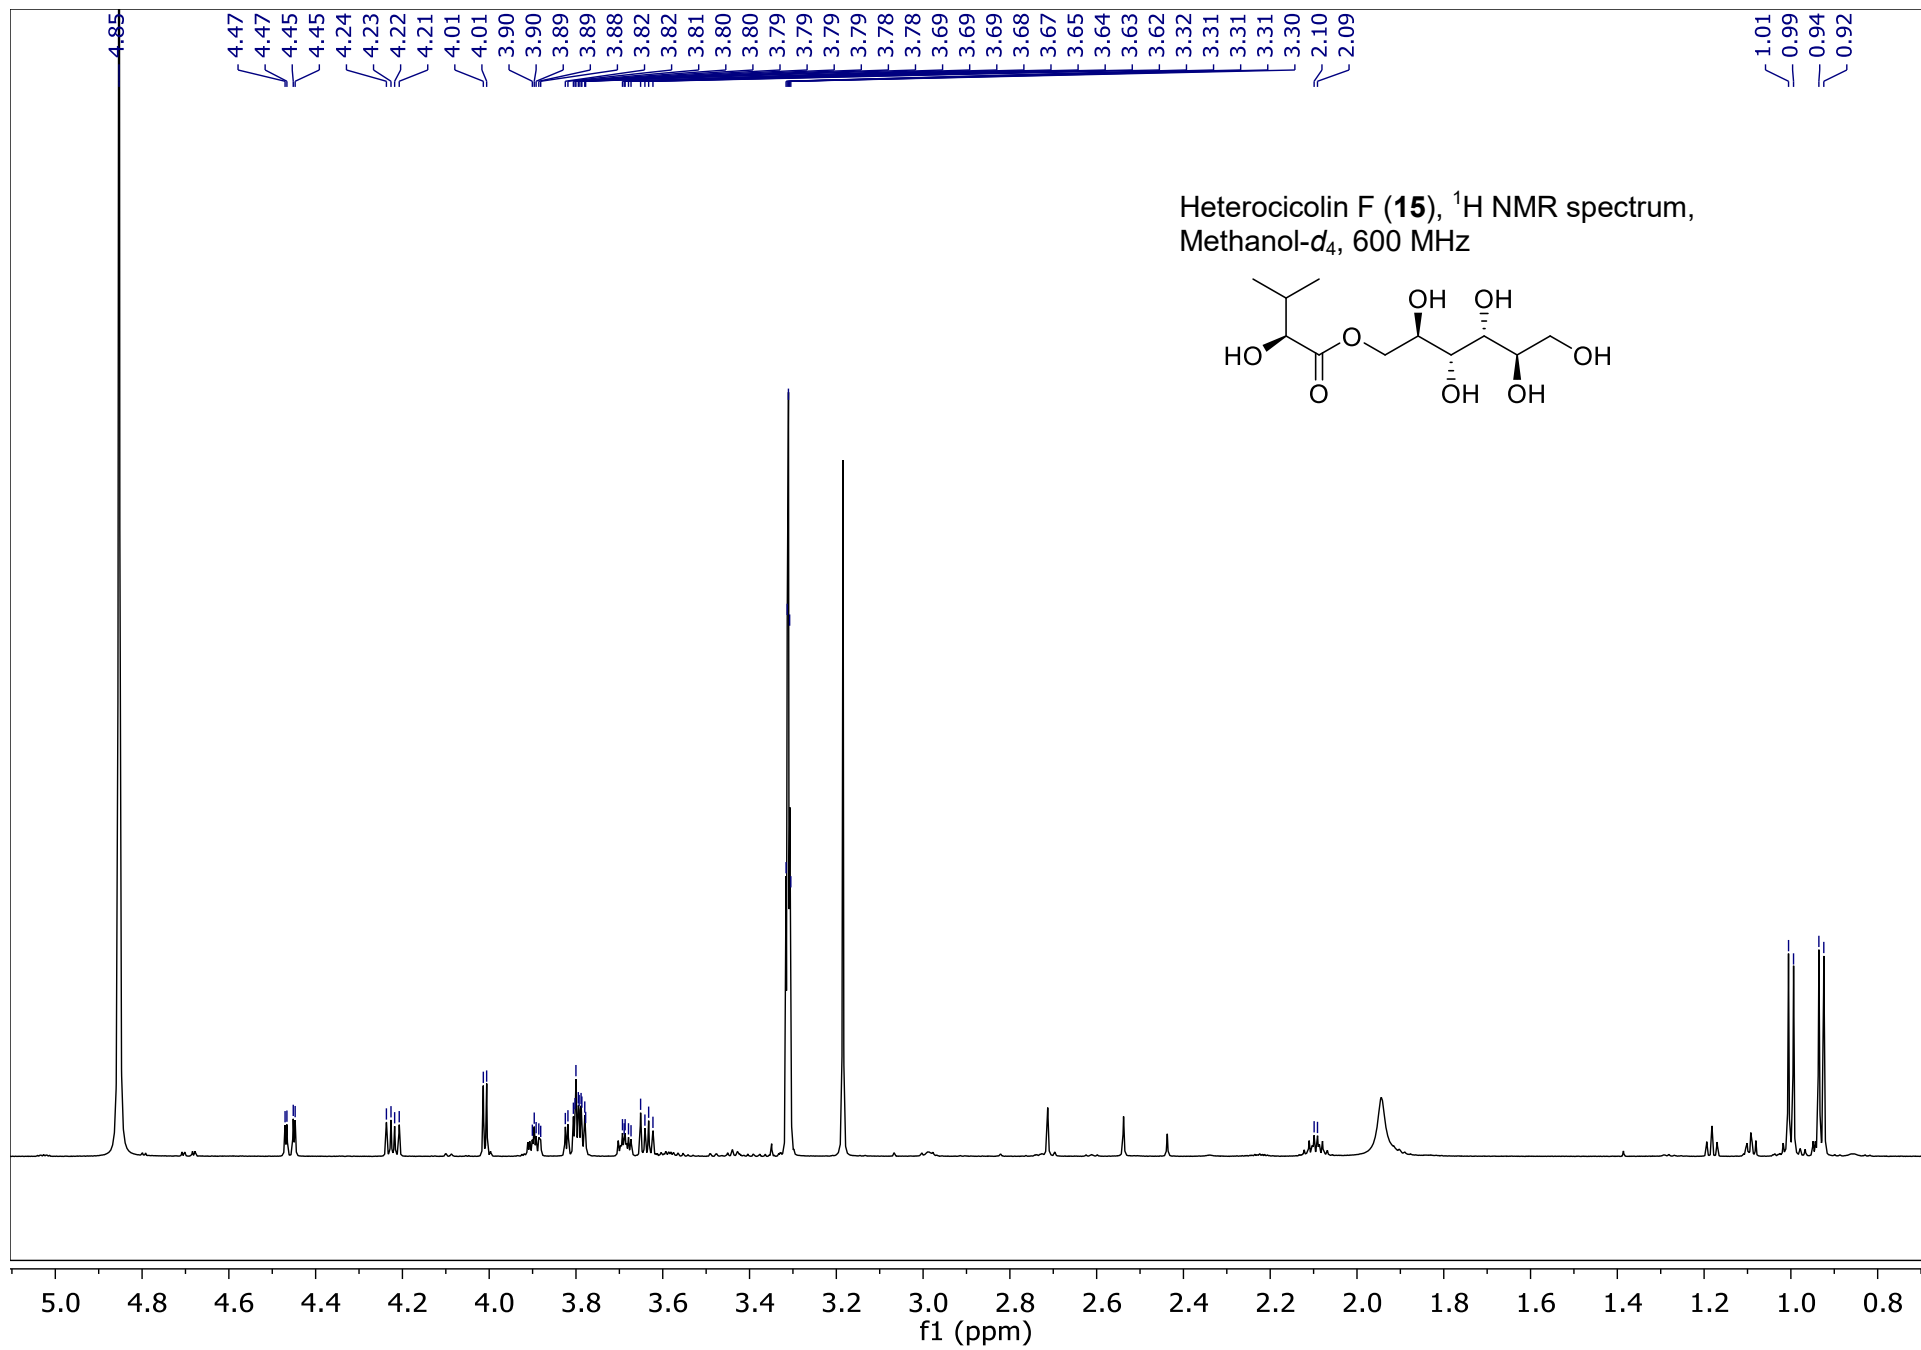

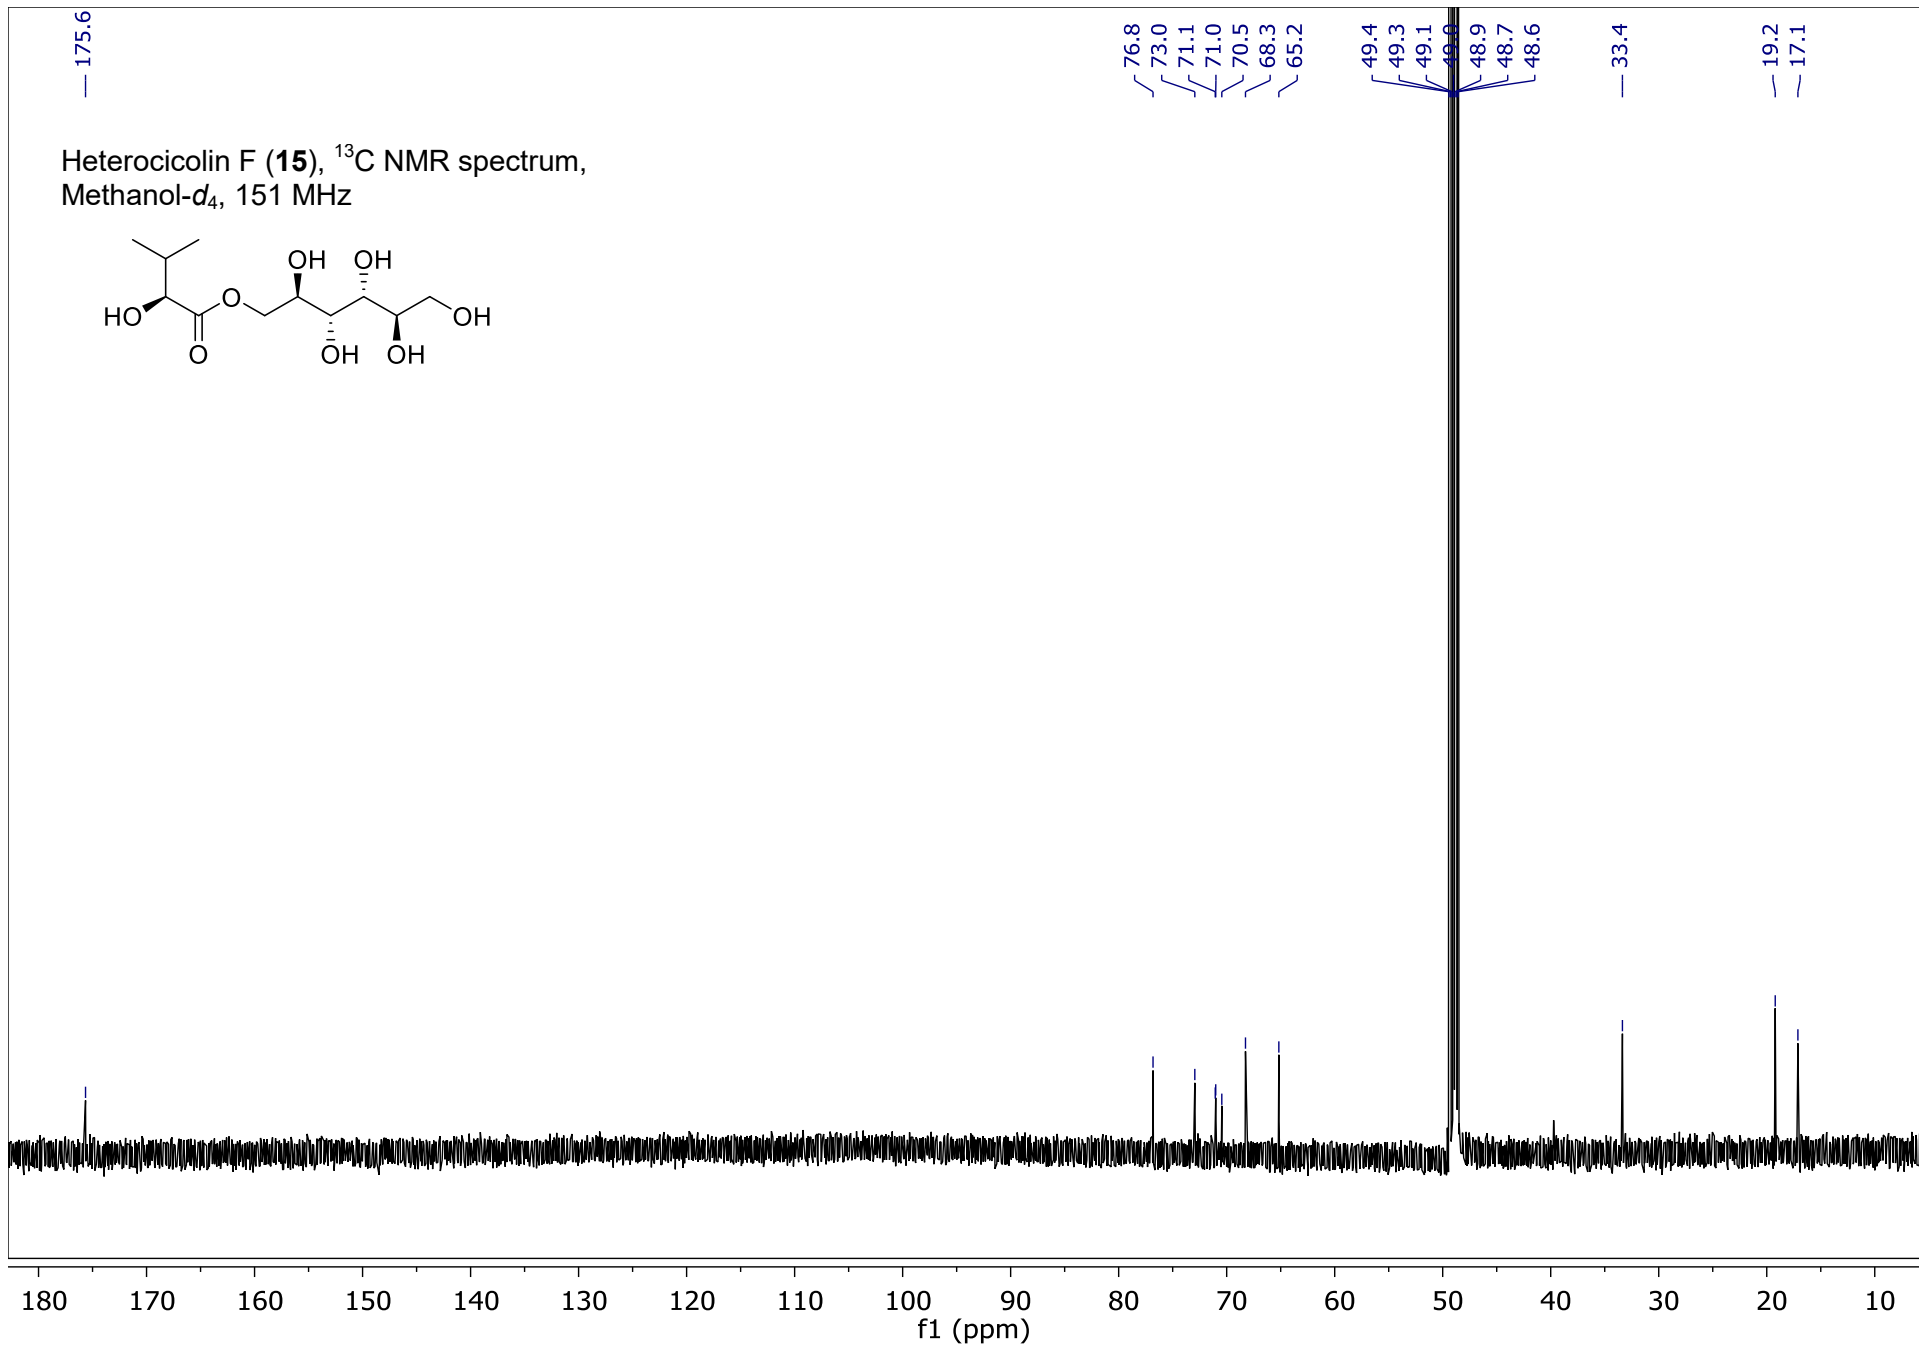

Heterocicolin F (**15**), dqfCOSY spectrum,  
Methanol-*d*<sub>4</sub>, 600 MHz

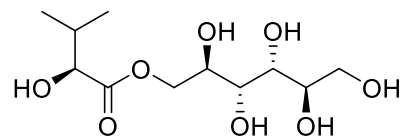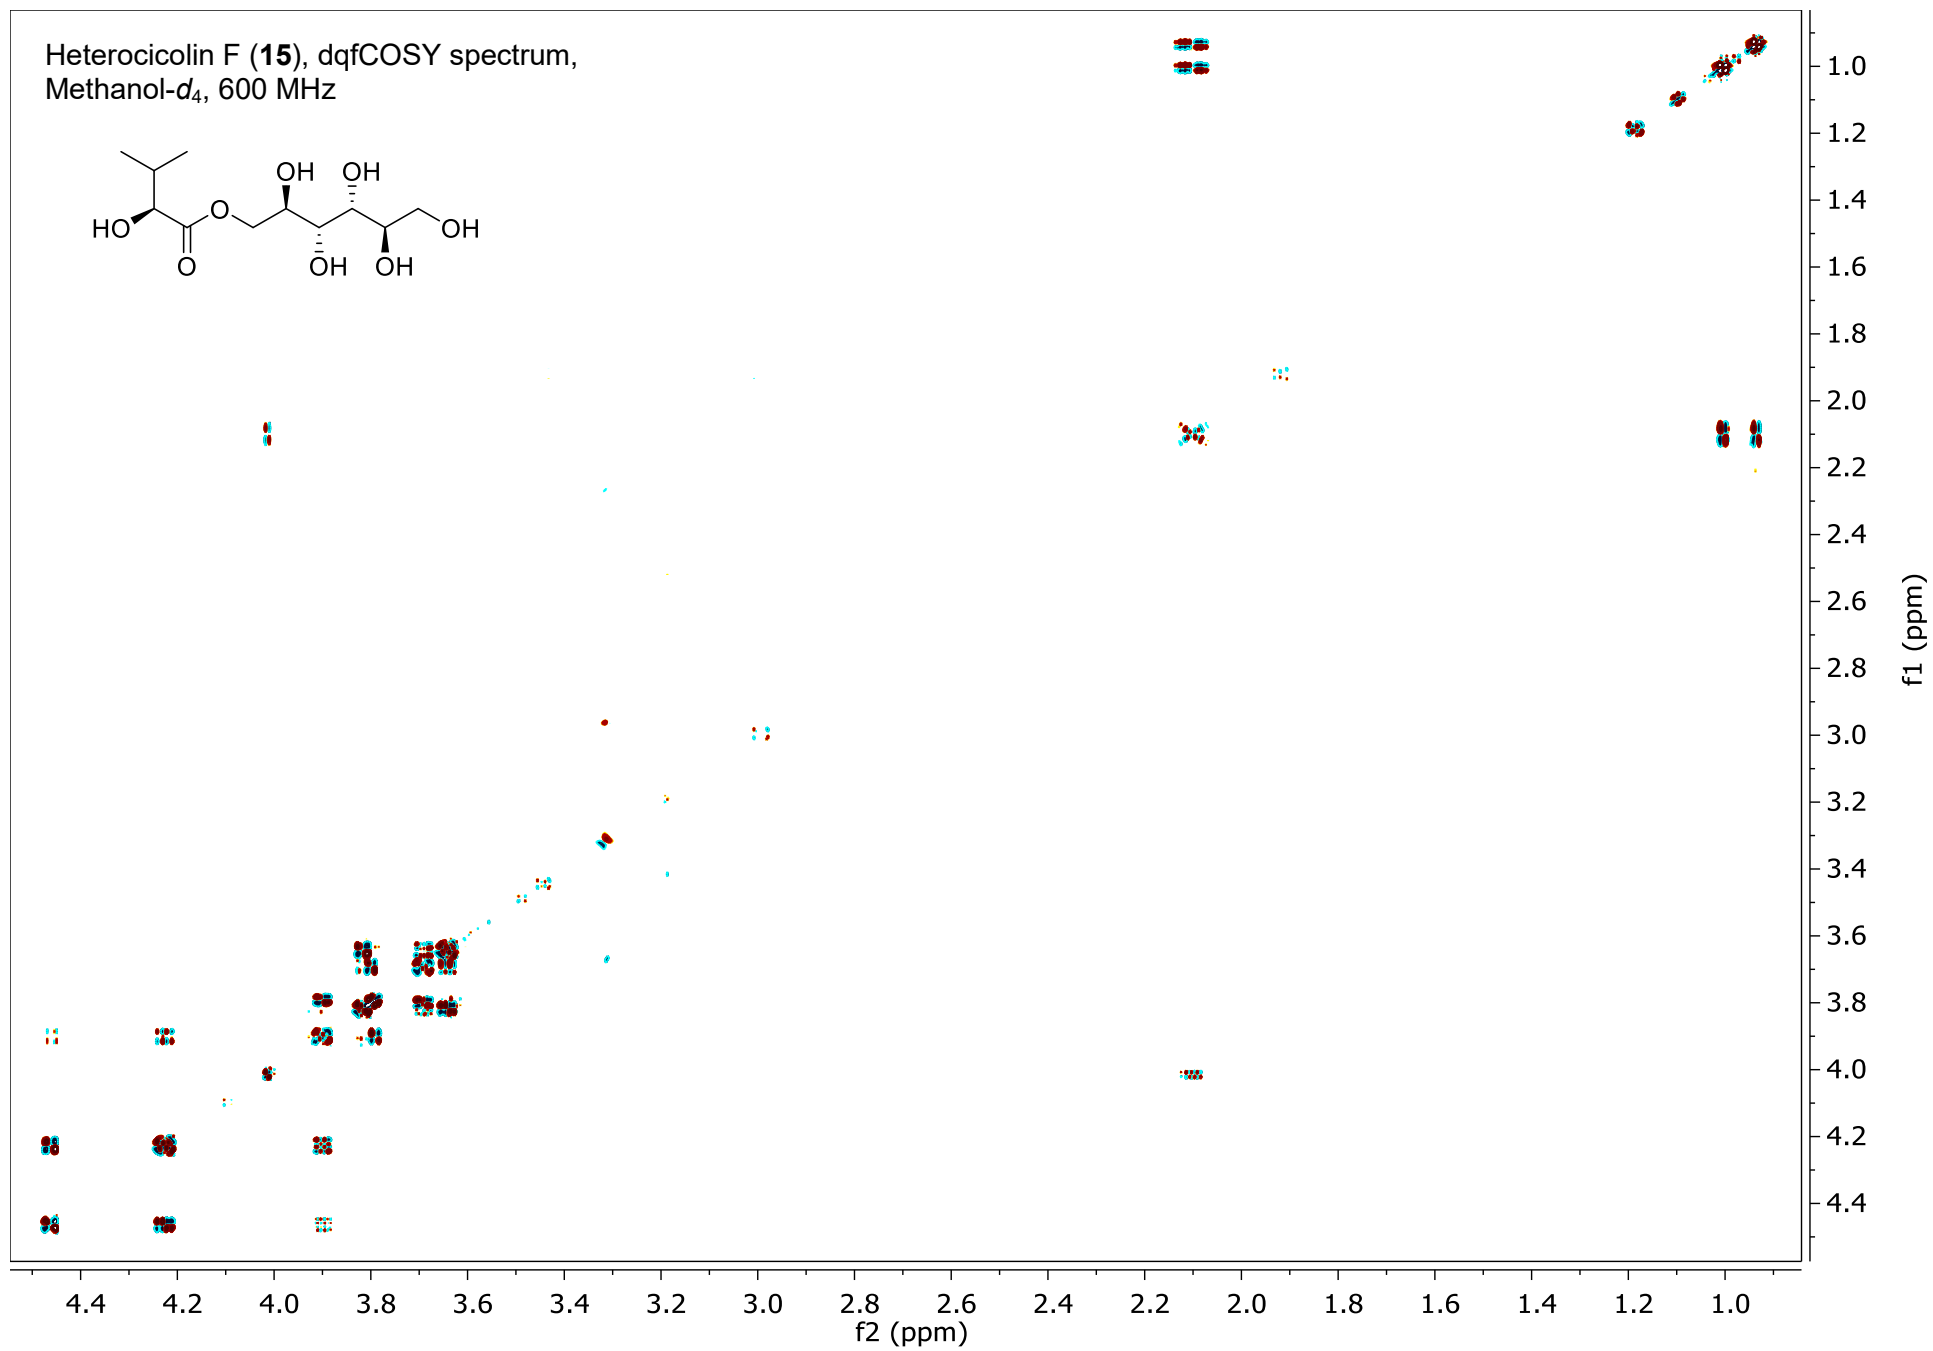

Heterocolin F (**15**), coupled HSQC spectrum,  
Methanol- $d_4$ , 600 MHz

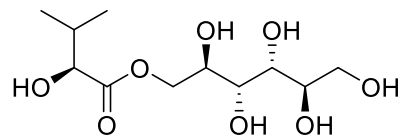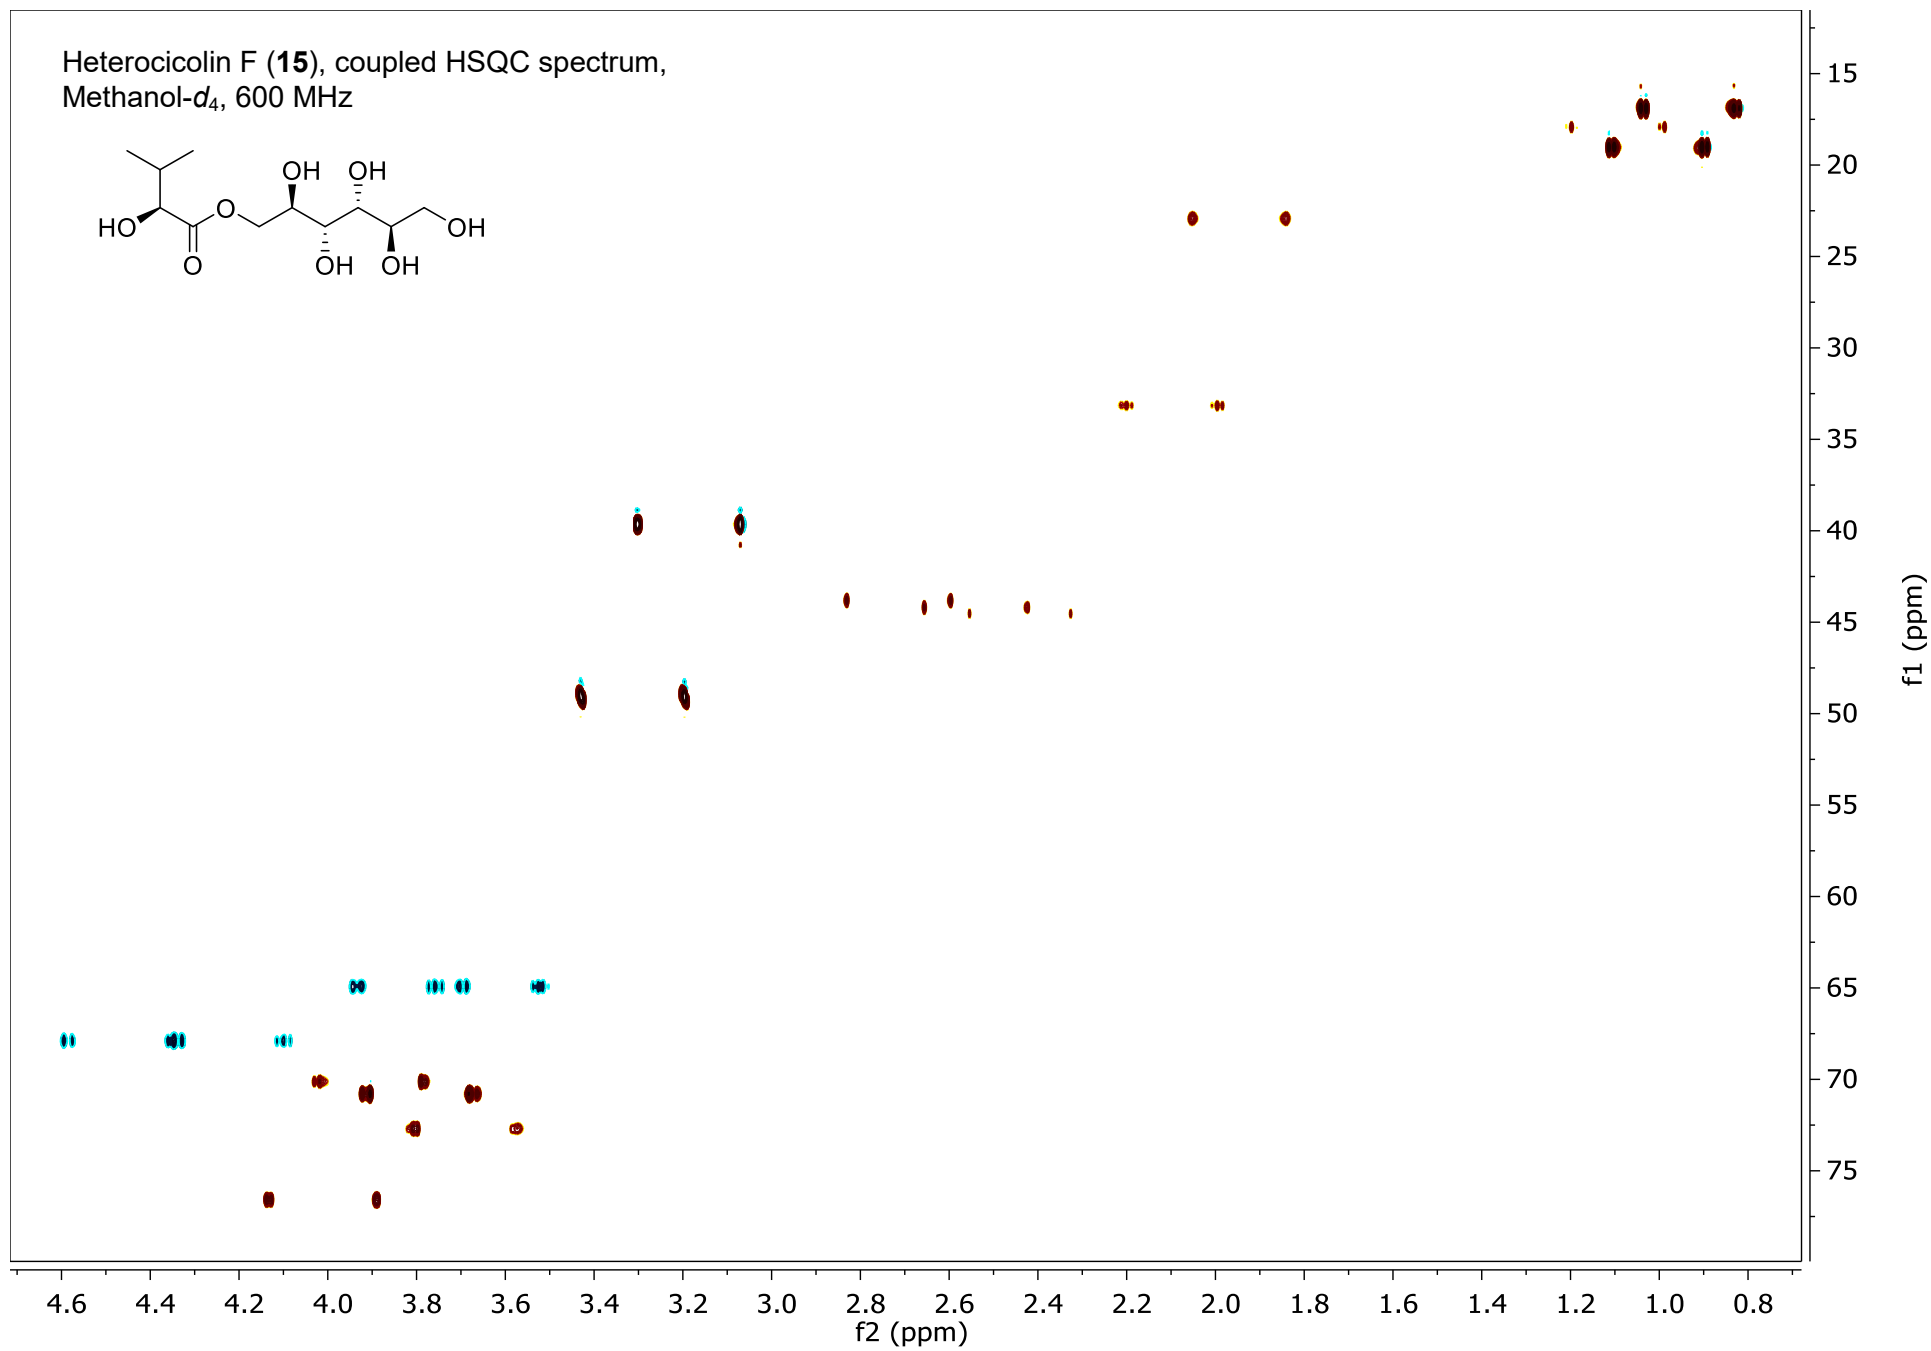





## 5. Supplementary References

1. Bodinaku, I. *et al.* Rapid phenotypic and metabolomic domestication of wild penicillium molds on cheese. *MBio* **10**, (2019).
2. Lim, F. Y. *et al.* Fungal isocyanide synthases and xanthocillin biosynthesis in *Aspergillus fumigatus*. *MBio* **9**, (2018).
3. Blachowicz, A. *et al.* Contributions of spore secondary metabolites to UV-C protection and virulence vary in different *Aspergillus fumigatus* strains. *MBio* **11**, 1–12 (2020).
4. Tannous, J. *et al.* New Insight Into Pathogenicity and Secondary Metabolism of the Plant Pathogen *Penicillium expansum* Through Deletion of the Epigenetic Reader SntB. *Front. Microbiol.* **11**, 1–13 (2020).
5. Leach, J., Lang, B. R. & Yoder, O. C. Methods for selection of mutants and in vitro culture of *Cochliobolus heterostrophus*. *J. Gen. Microbiol.* **128**, 1719–1729 (1982).
6. Vincent, W. J. B., Freisinger, C. M., Lam, P. Y., Huttenlocher, A. & Sauer, J. D. Macrophages mediate flagellin induced inflammasome activation and host defense in zebrafish. *Cell. Microbiol.* **18**, 591–604 (2016).
7. Wiles, T. J., Bower, J. M., Redd, M. J. & Mulvey, M. A. Use of zebrafish to probe the divergent virulence potentials and toxin requirements of extraintestinal pathogenic *Escherichia coli*. *PLoS Pathog.* **5**, (2009).
8. Kolter, R., Bloemberg, G. V, O'Toole, G. & Lugtenberg, B. J. Green Fluorescent Protein as a Marker for *Pseudomonas* spp. *Appl. Environ. Microbiol.* **63**, 4543 (1997).
